# Supplementary material
Source: MDPI journal article supplement (https://www.mdpi.com/2075-4442/10/12/368)
Supplement: s1 [file s1]

Archive with 2 entries (2 files):
- Supplemental Material S1.pdf
- Supplemental Material S2.zip
