# Supplementary material (part 1 of 2)
Source: MDPI journal article supplement (https://www.mdpi.com/2075-4442/10/12/368)

$$P_{max}^w / P_{max}^s$$

$$w = 200\text{N}, u_s = 0.3\text{m/s}, \theta = -60^\circ$$

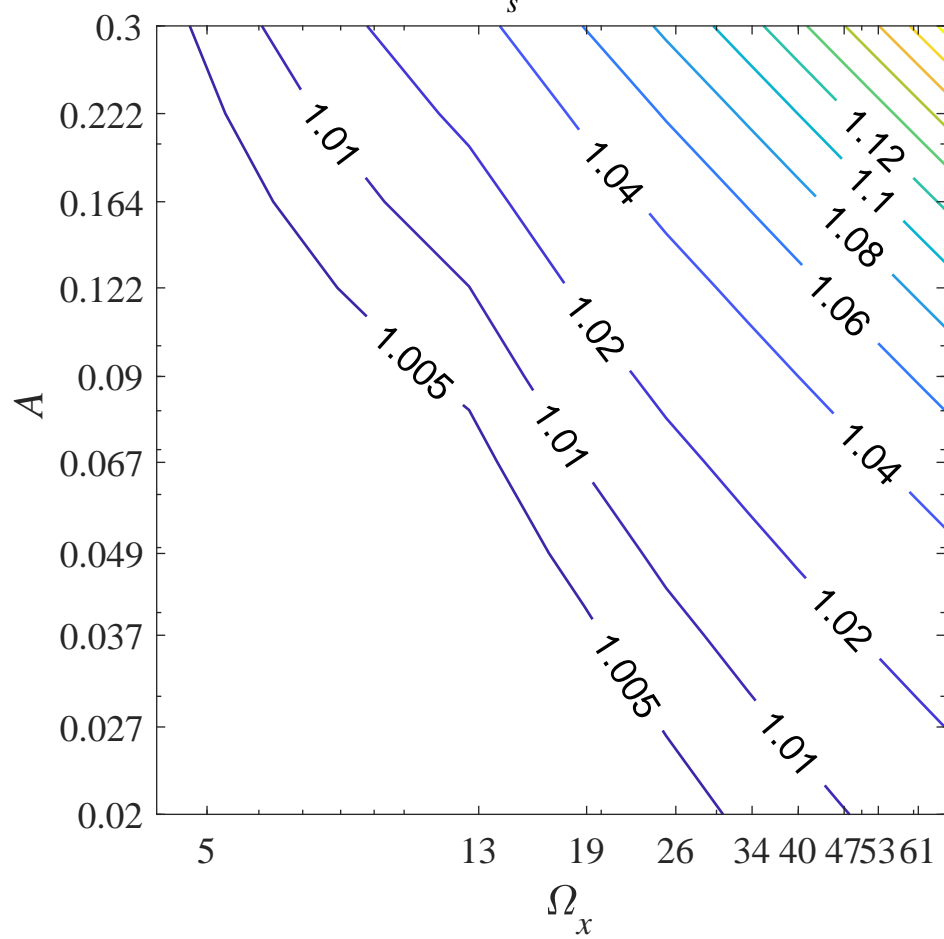

Supplement: s1 [file s1]

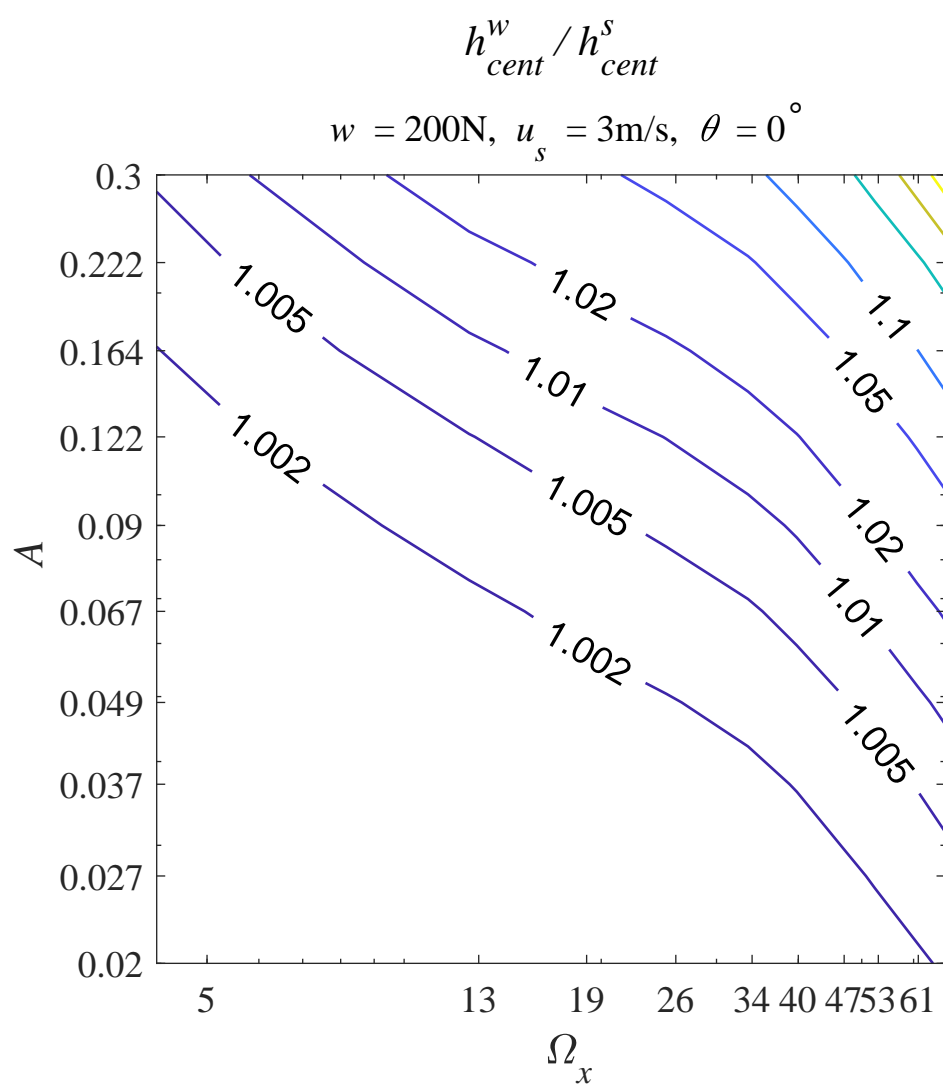

Supplement: s1 [file s1]

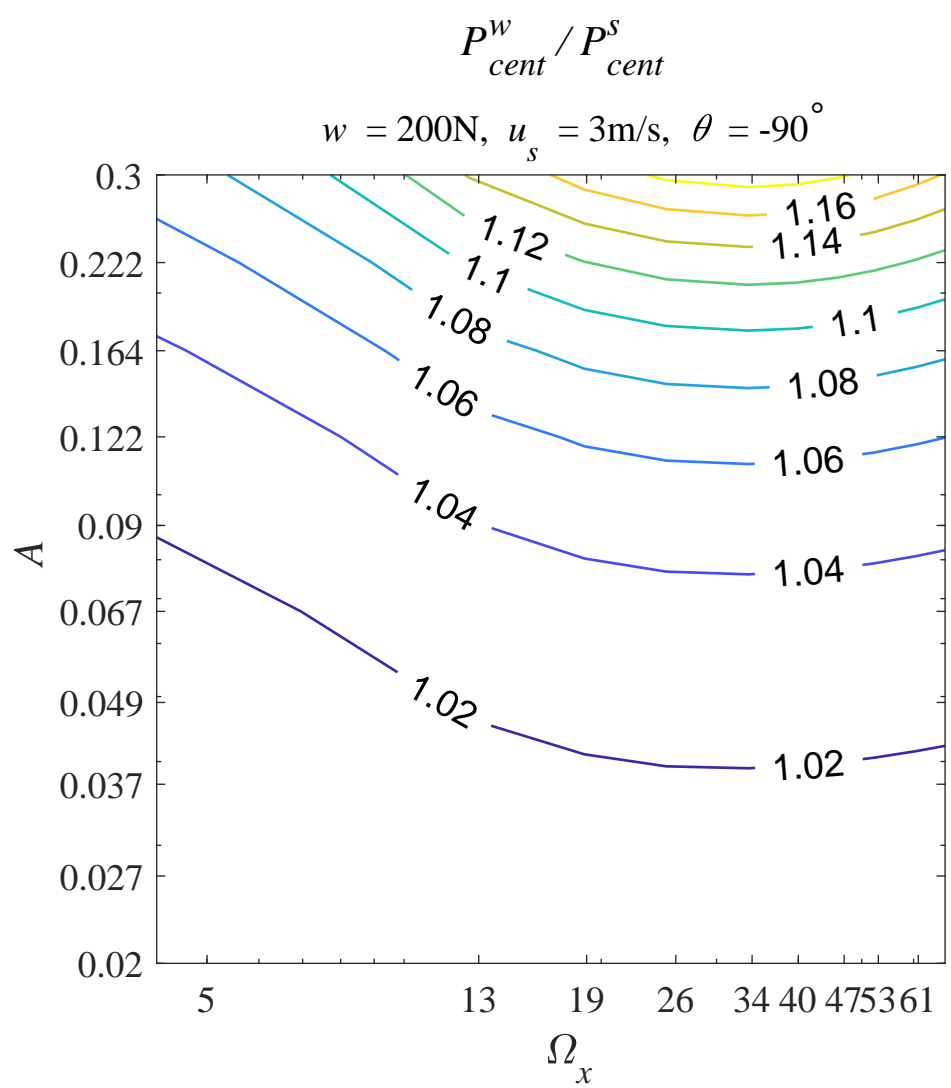

Supplement: s1 [file s1]

$$P_{max}^w / P_{max}^s$$

$$w = 200\text{N}, u_s = 3\text{m/s}, \theta = 0^\circ$$

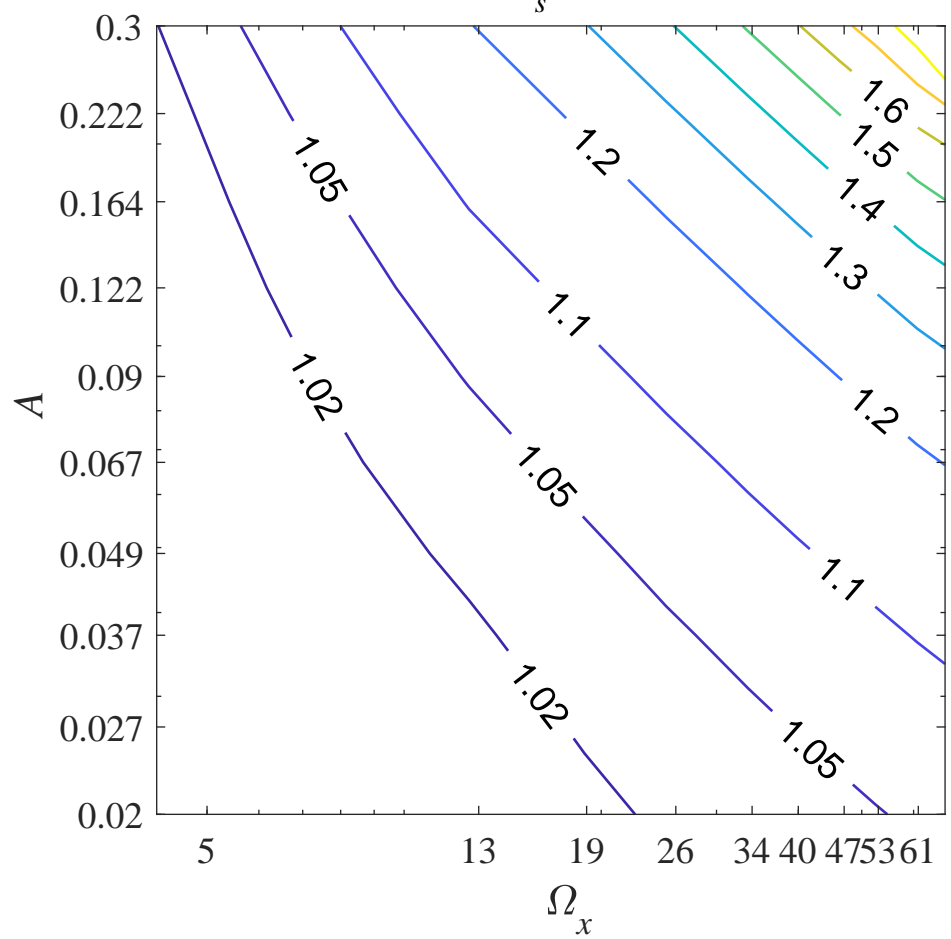

Supplement: s1 [file s1]

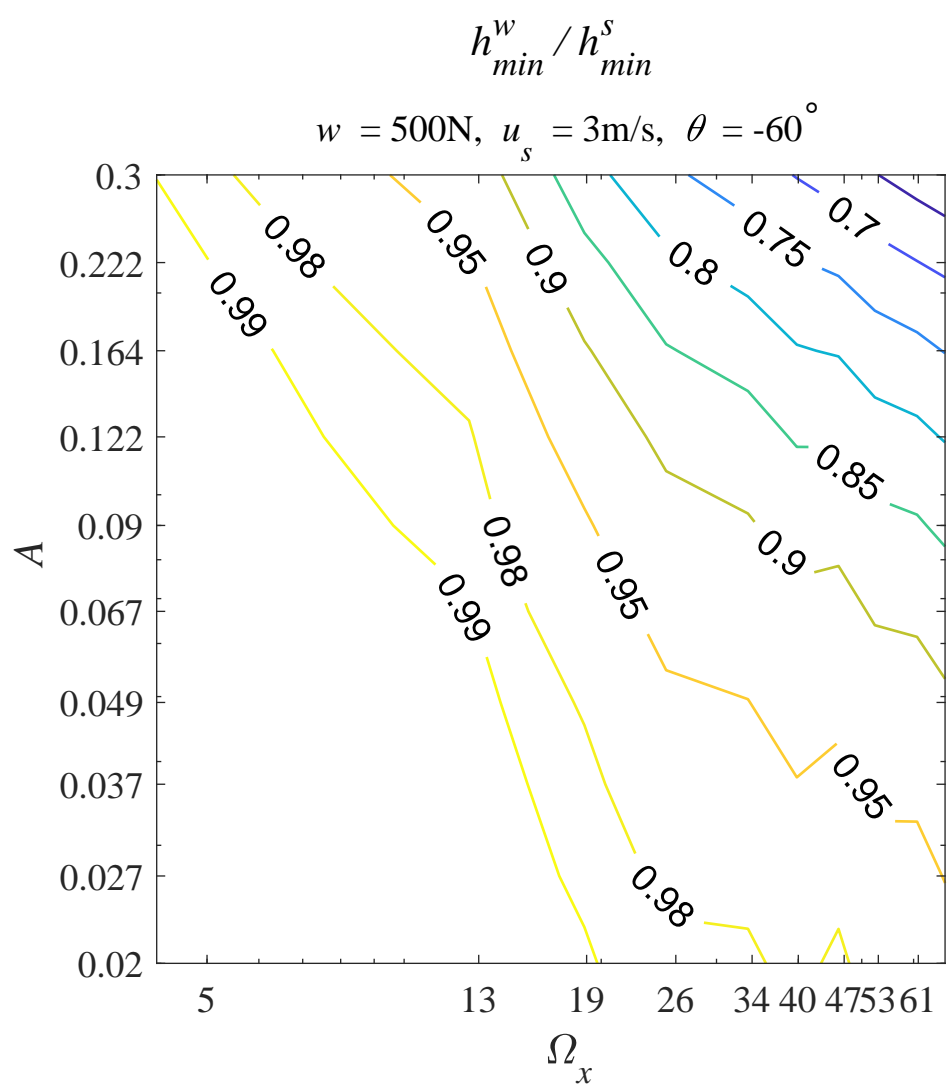

Supplement: s1 [file s1]

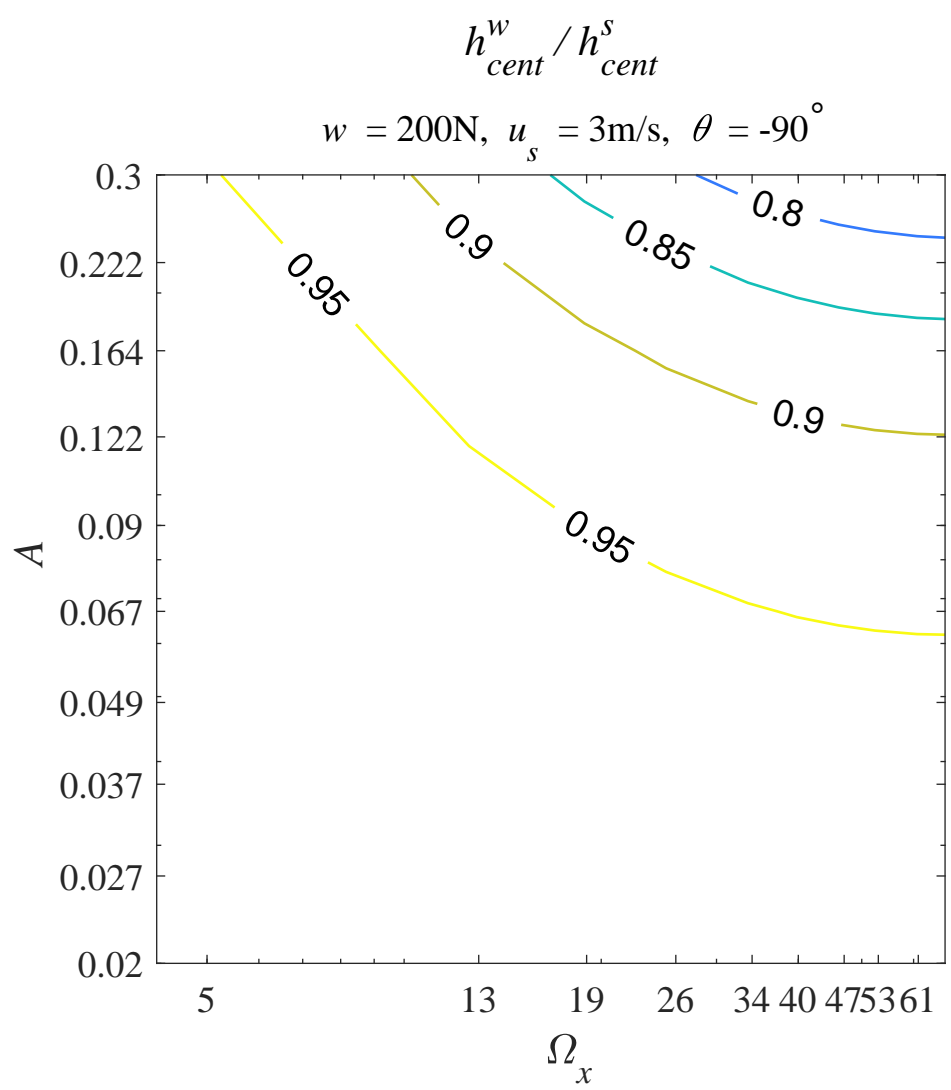

Supplement: s1 [file s1]

$$P_{max}^w / P_{max}^s$$

$$w = 500\text{N}, u_s = 0.3\text{m/s}, \theta = -30^\circ$$

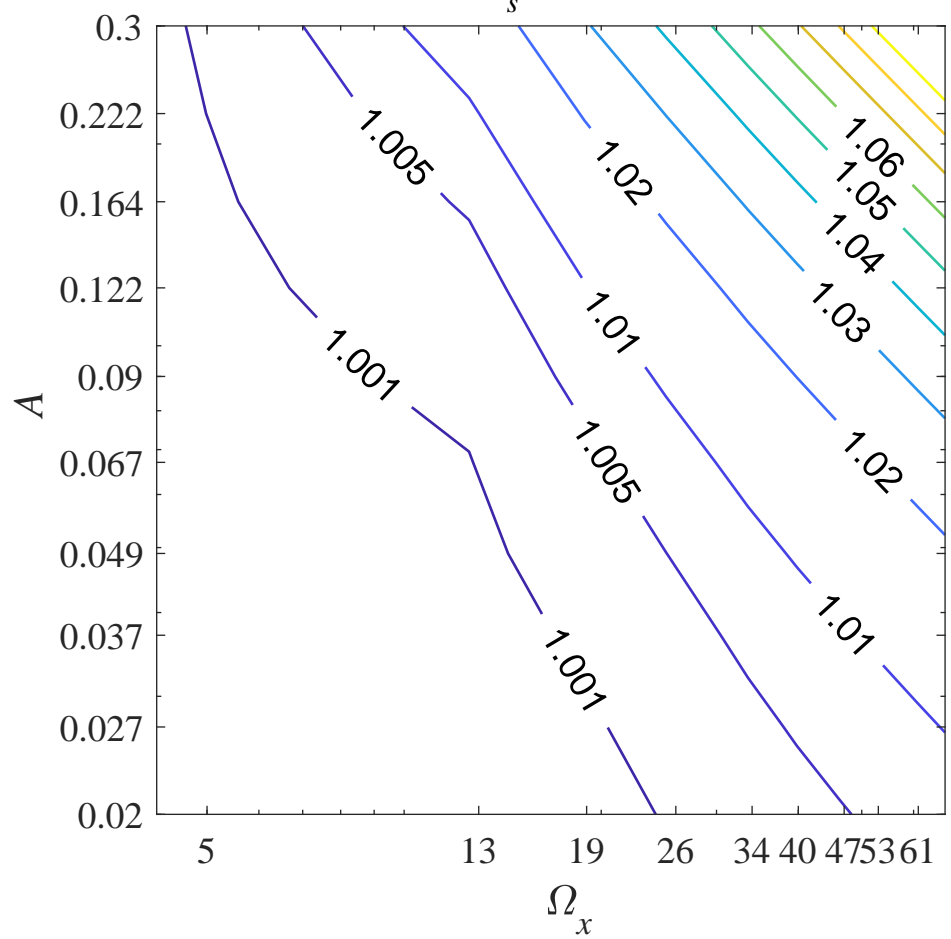

Supplement: s1 [file s1]

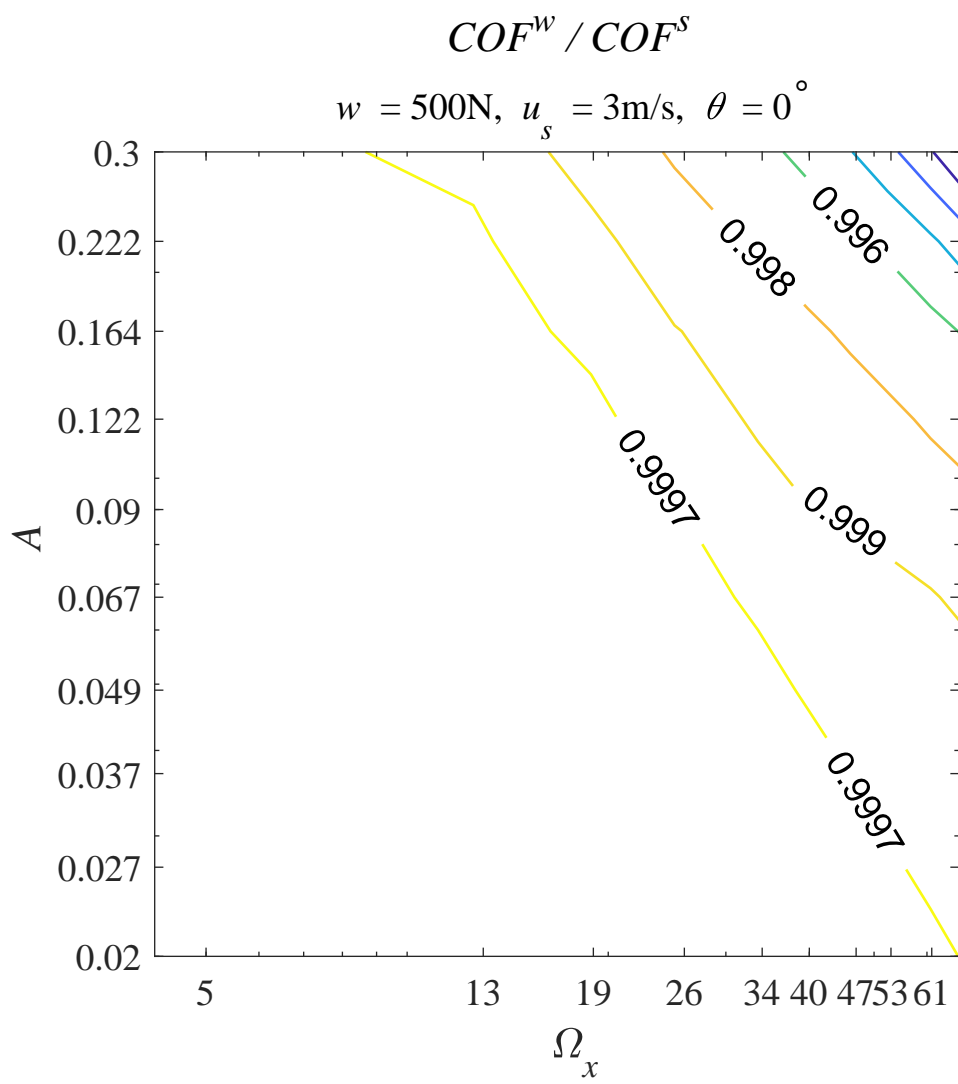

Supplement: s1 [file s1]

$$h_{mean}^w / h_{mean}^s$$

$$w = 500\text{N}, u_s = 3\text{m/s}, \theta = -30^\circ$$

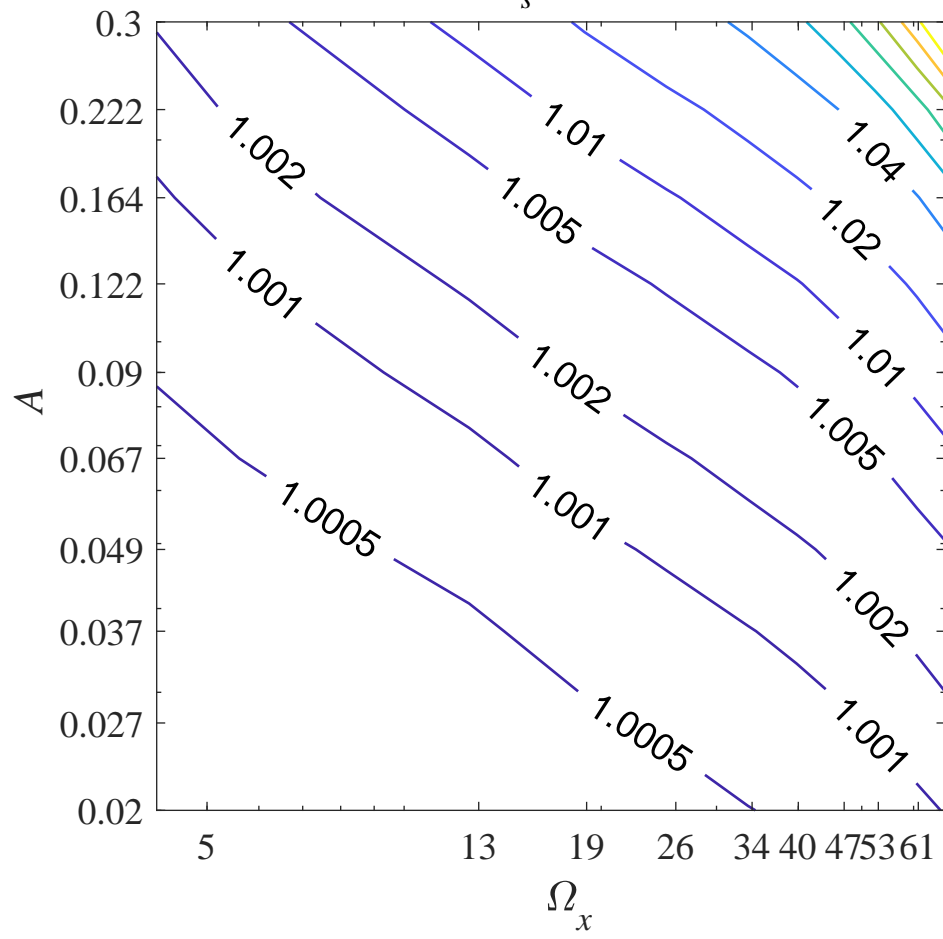

Supplement: s1 [file s1]

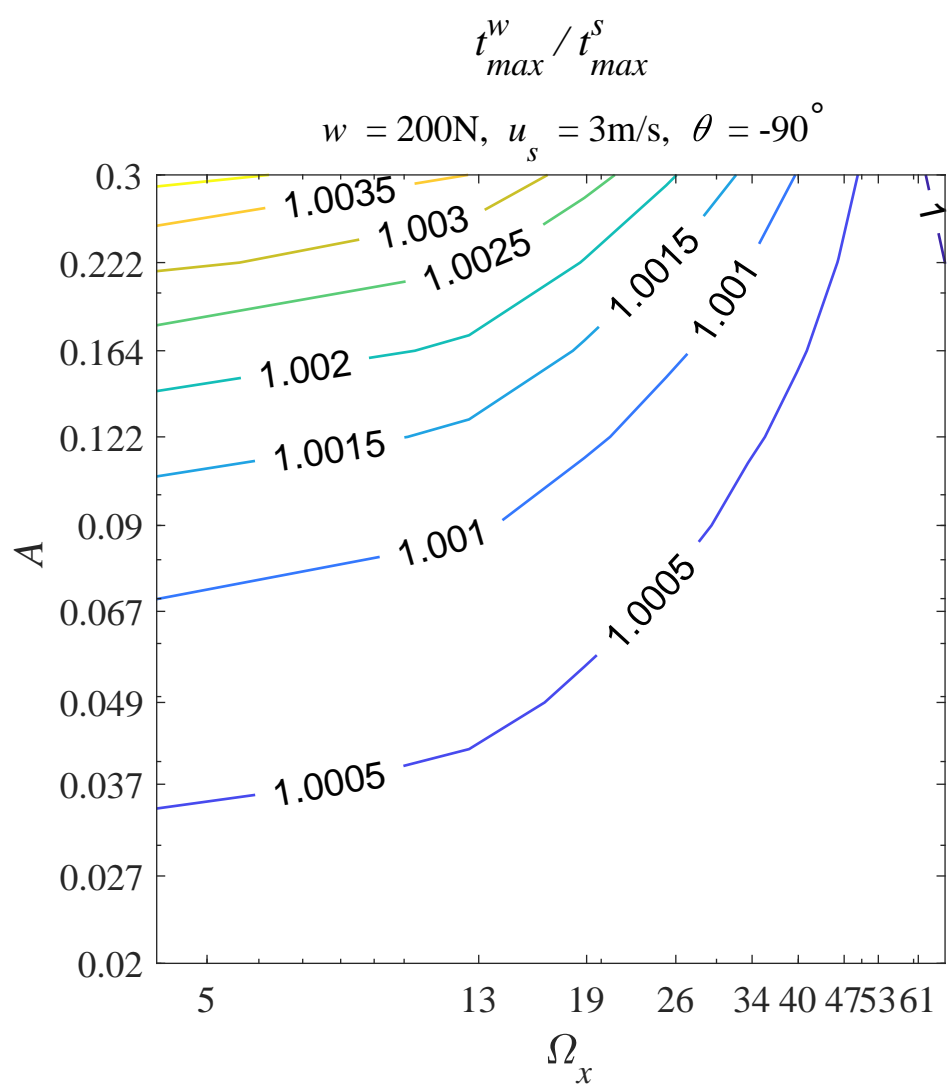

Supplement: s1 [file s1]

$$h_{min}^w / h_{min}^s$$

$$w = 500\text{N}, u_s = 3\text{m/s}, \theta = 0^\circ$$

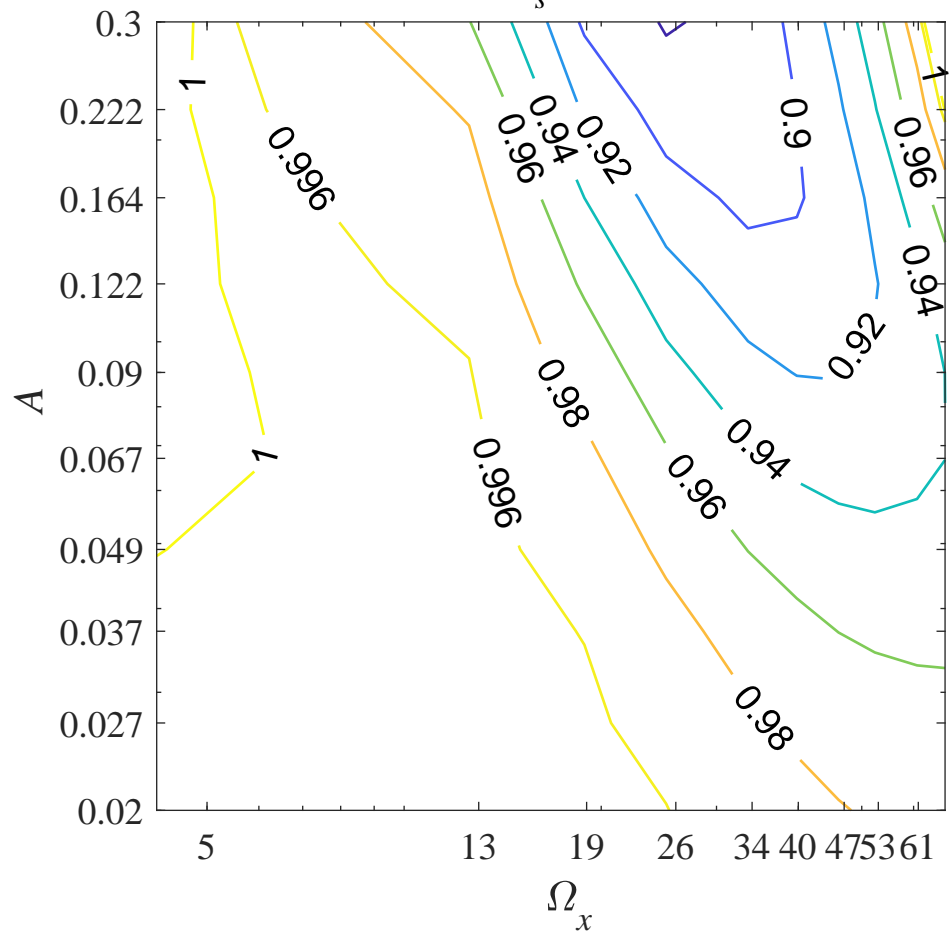

Supplement: s1 [file s1]

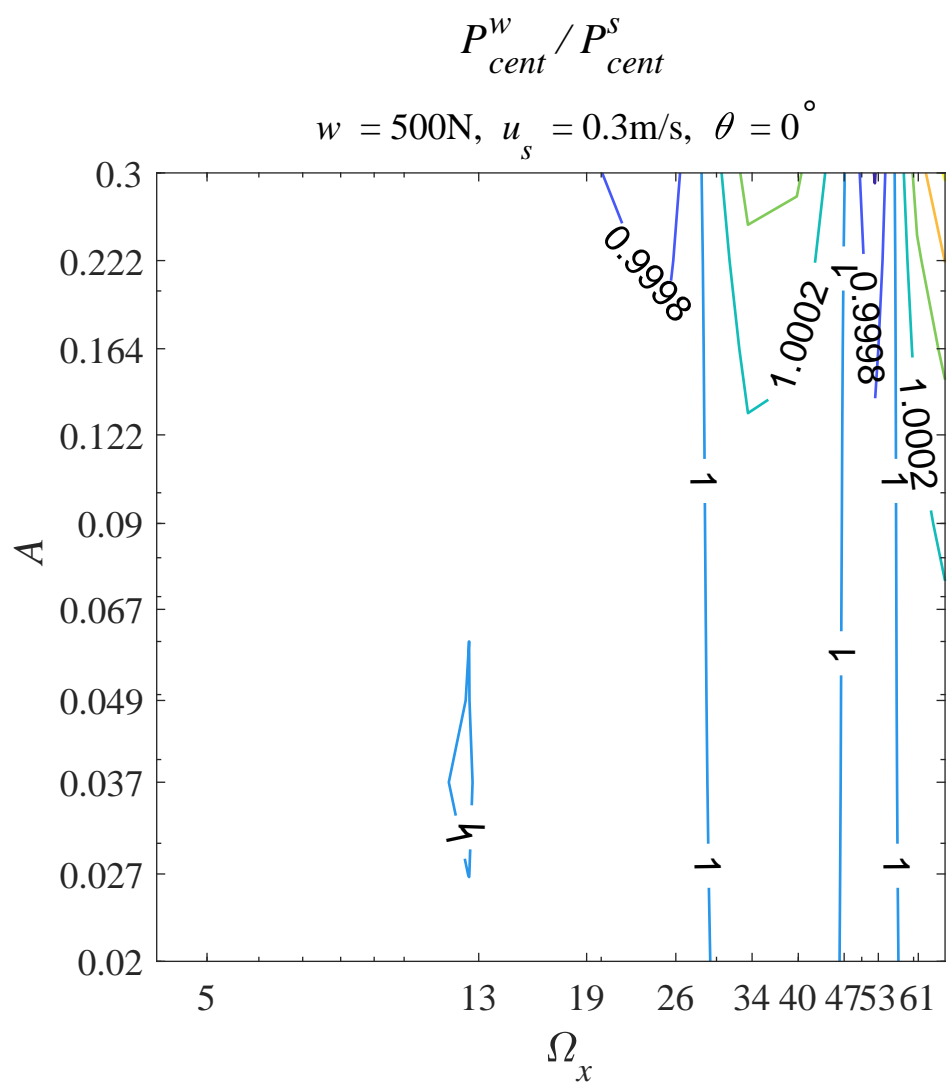

Supplement: s1 [file s1]

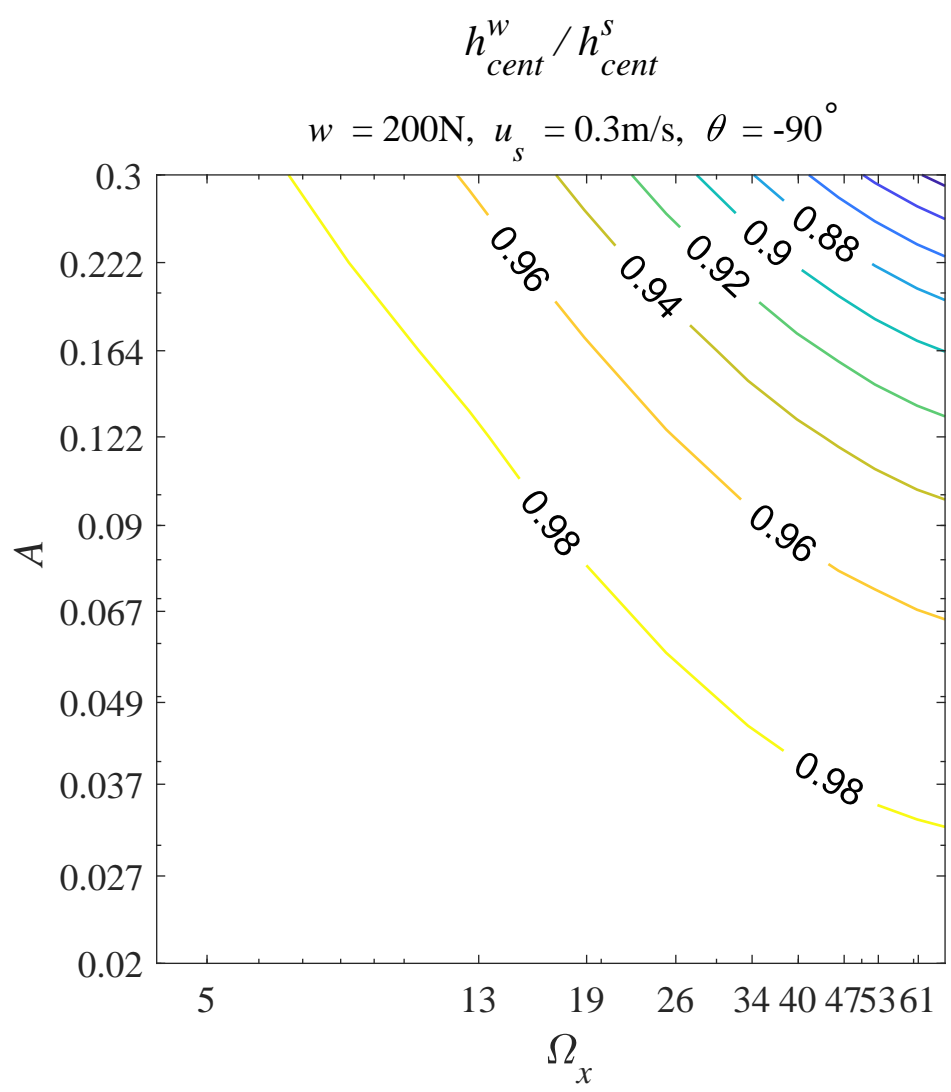

Supplement: s1 [file s1]

$$COF^w / COF^s$$

$$w = 200\text{N}, u_s = 3\text{m/s}, \theta = -90^\circ$$

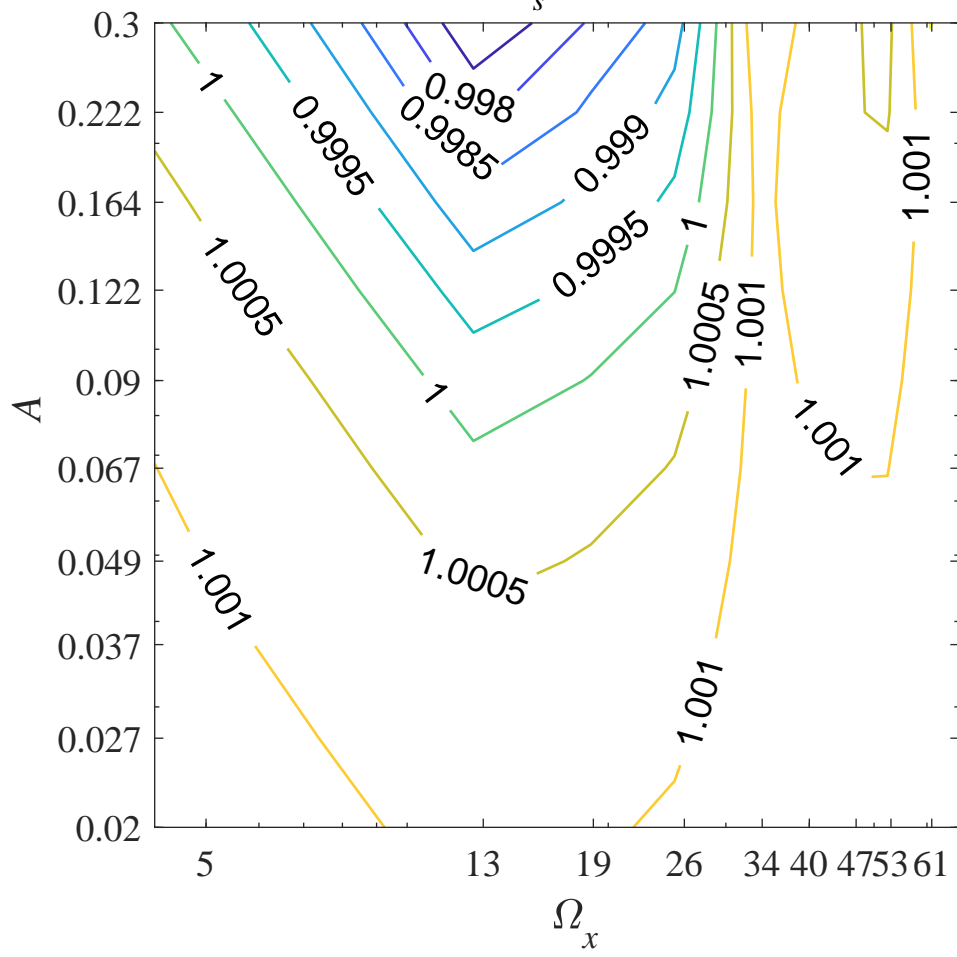

Supplement: s1 [file s1]

$$P_{max}^w / P_{max}^s$$

$$w = 200\text{N}, u_s = 3\text{m/s}, \theta = -60^\circ$$

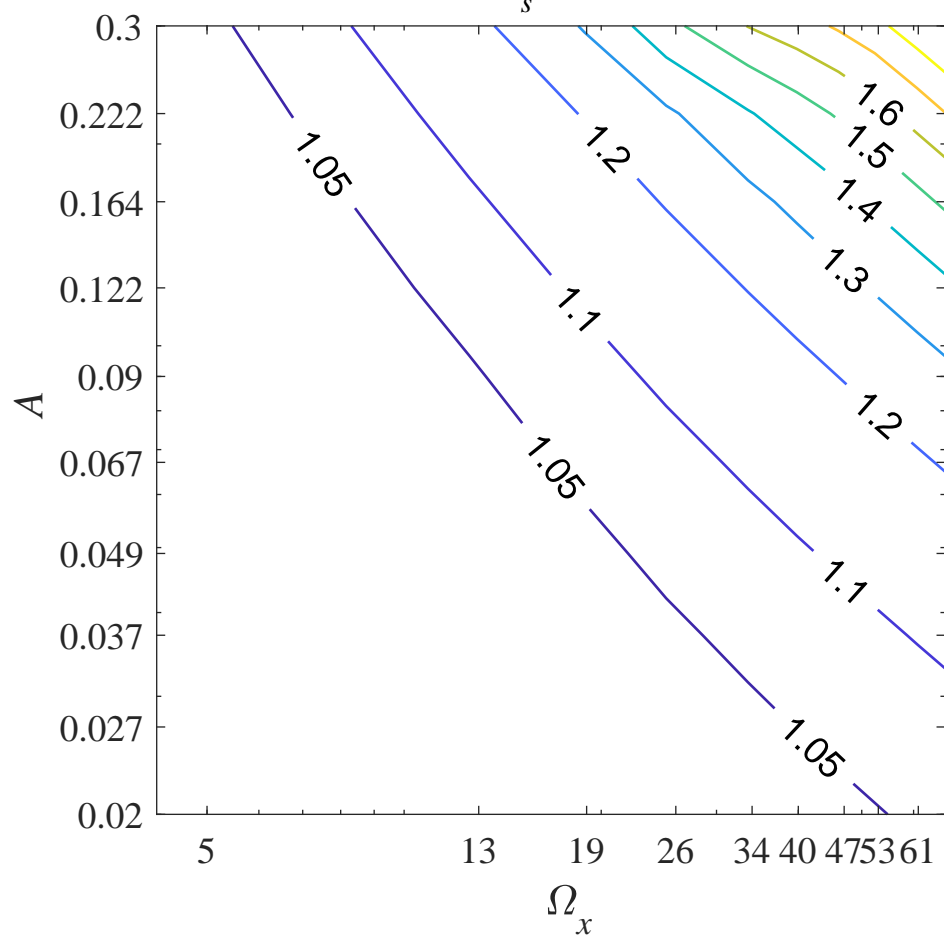

Supplement: s1 [file s1]

$$h_{cent}^w / h_{cent}^s$$

$$w = 500\text{N}, u_s = 3\text{m/s}, \theta = 0^\circ$$

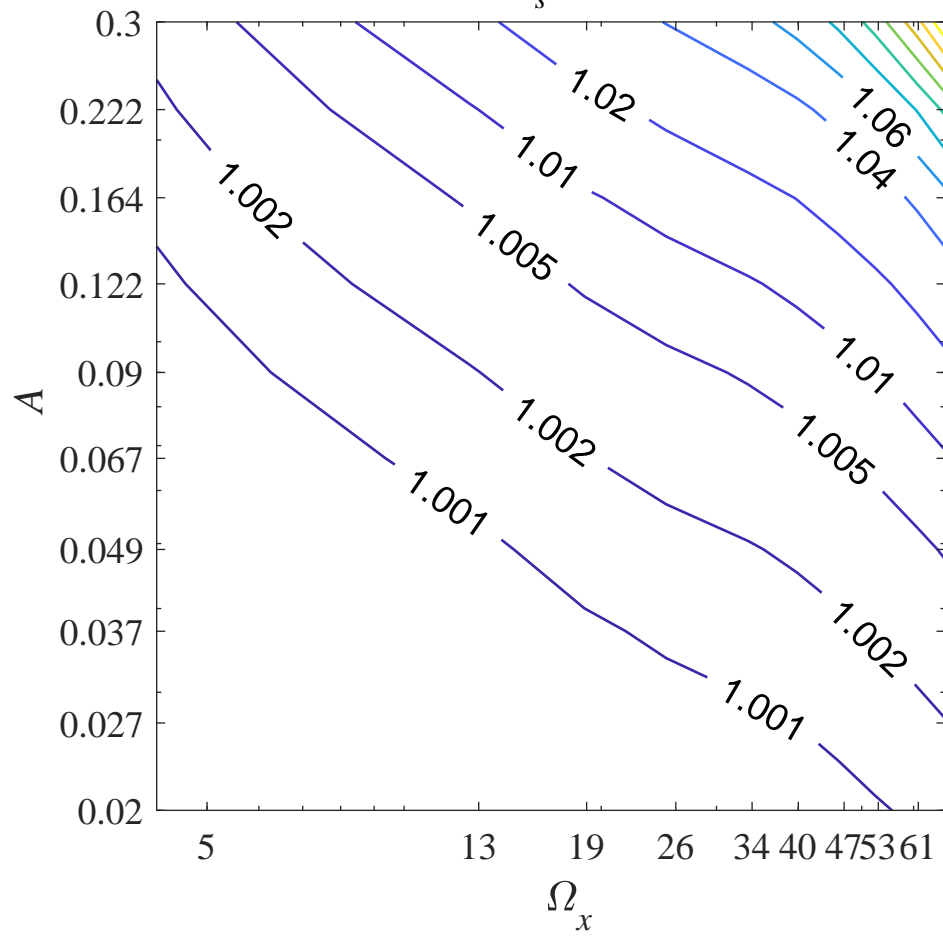

Supplement: s1 [file s1]

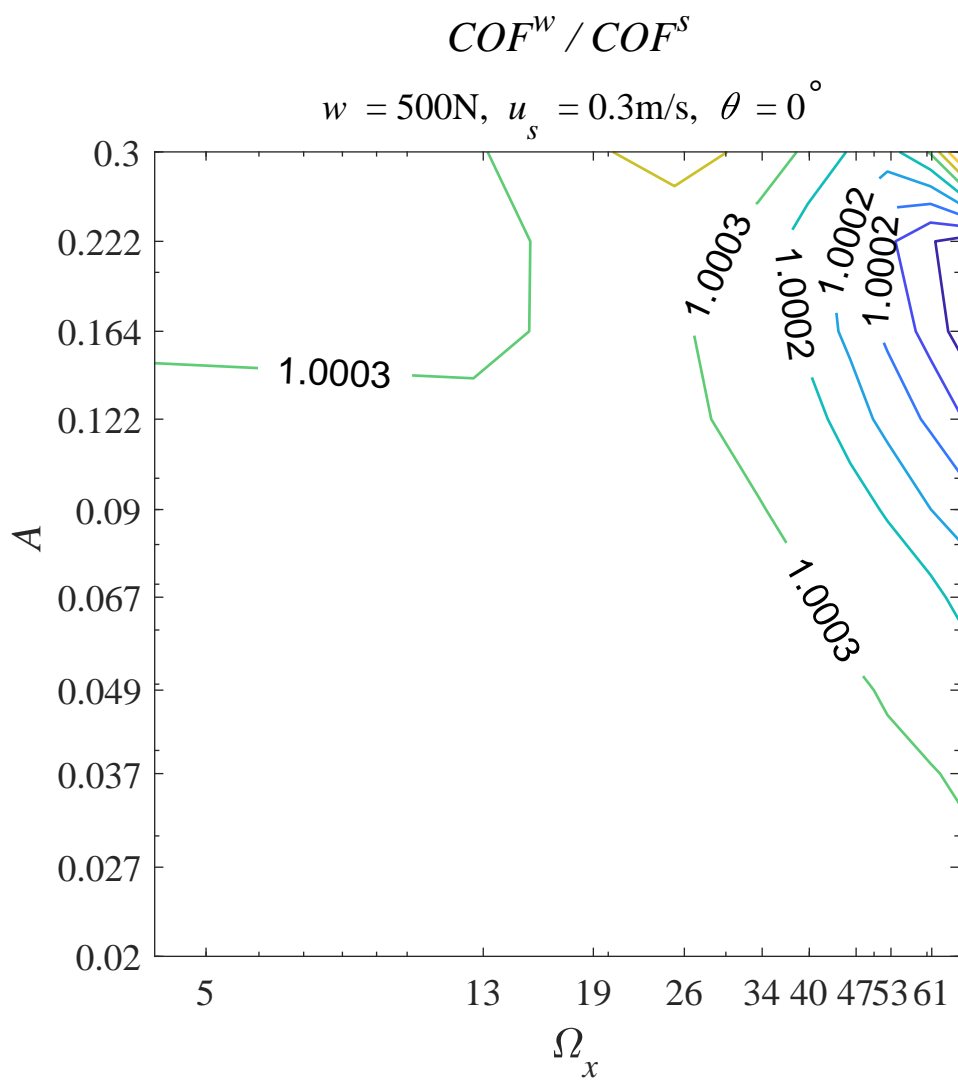

Supplement: s1 [file s1]

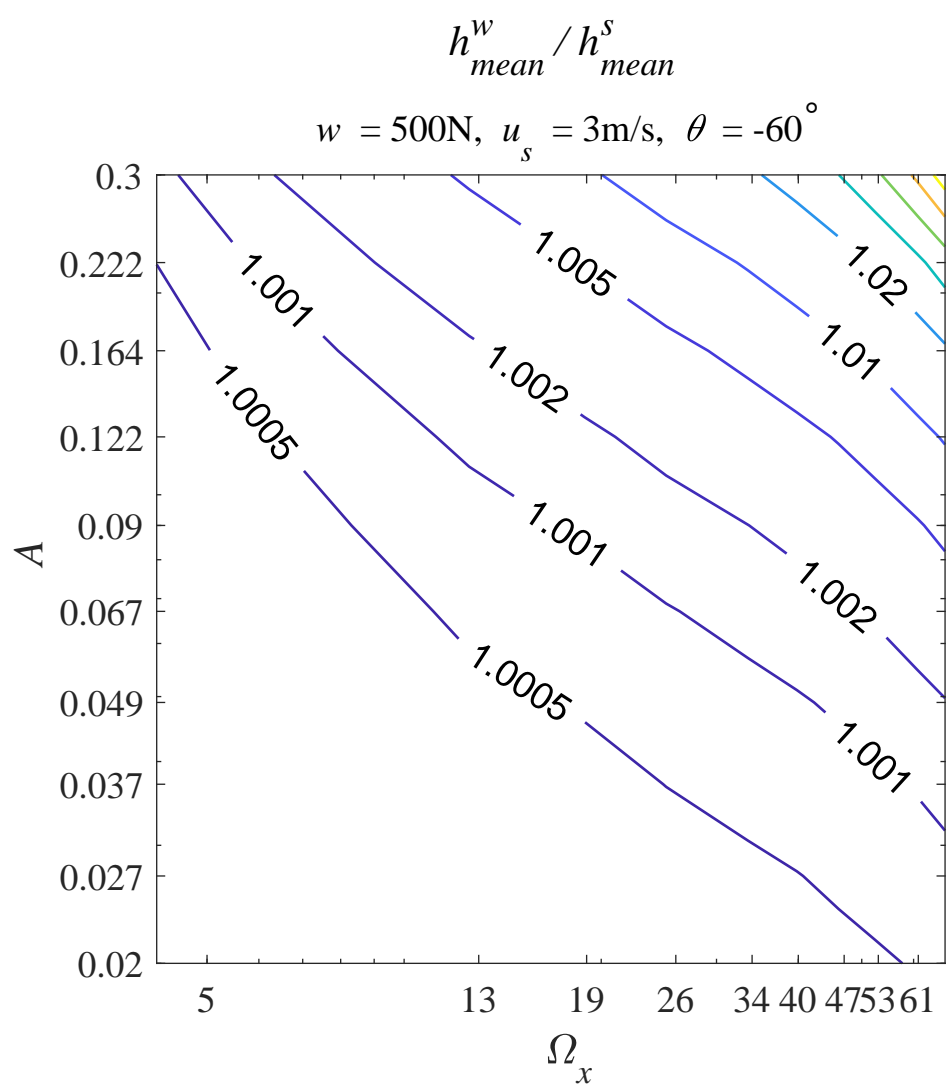

Supplement: s1 [file s1]

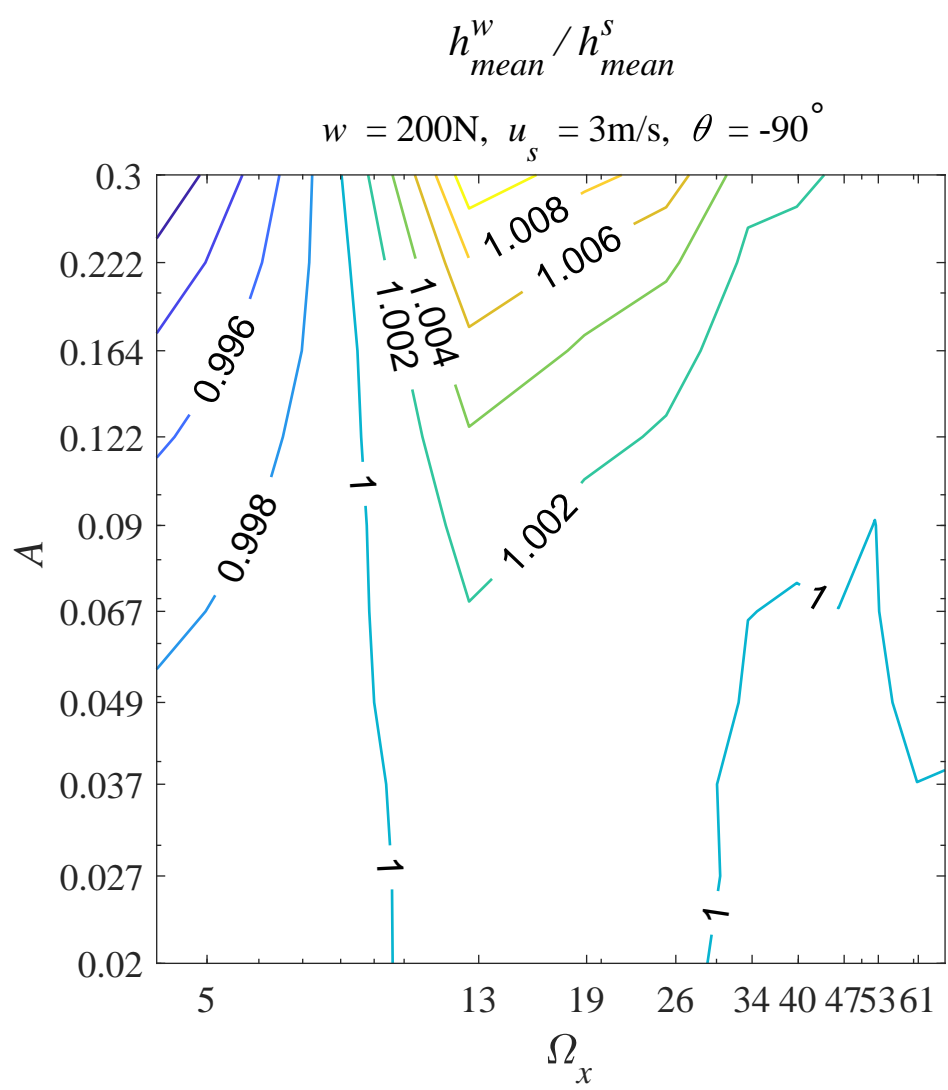

Supplement: s1 [file s1]

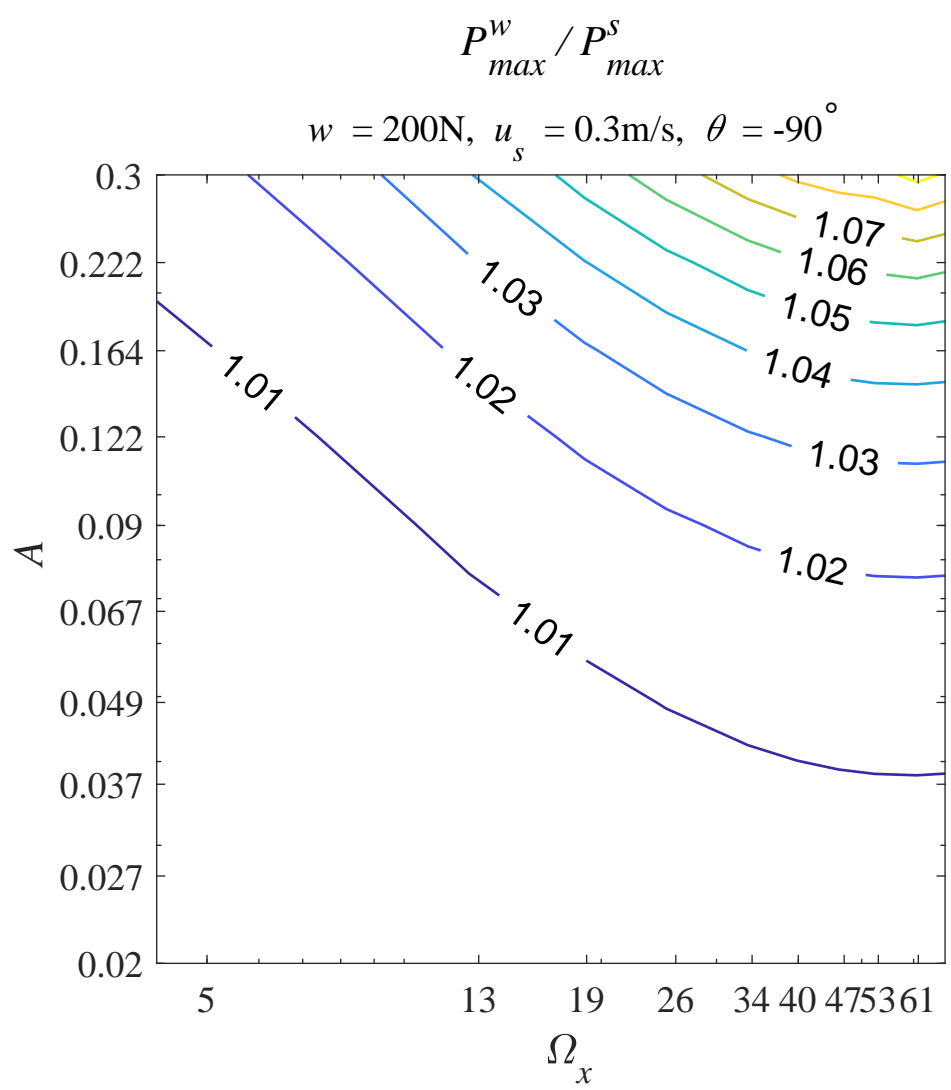

Supplement: s1 [file s1]

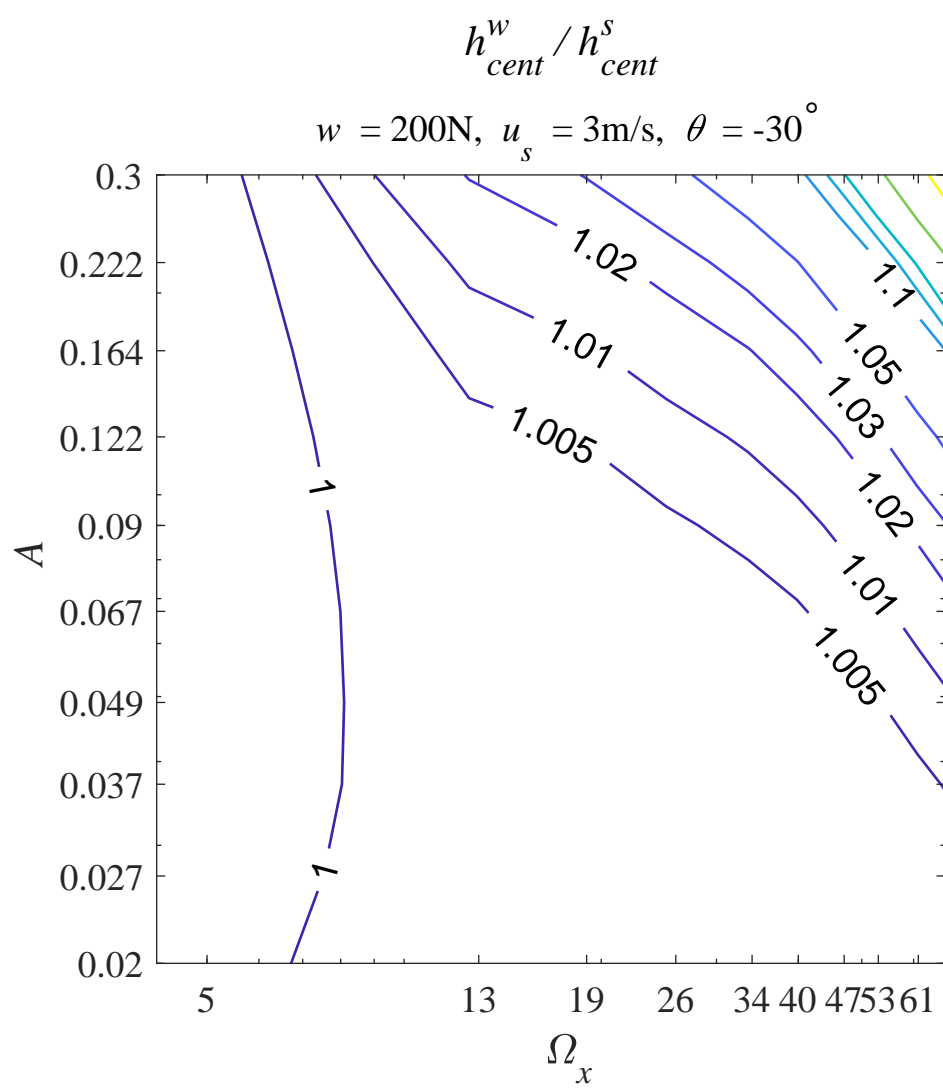

Supplement: s1 [file s1]

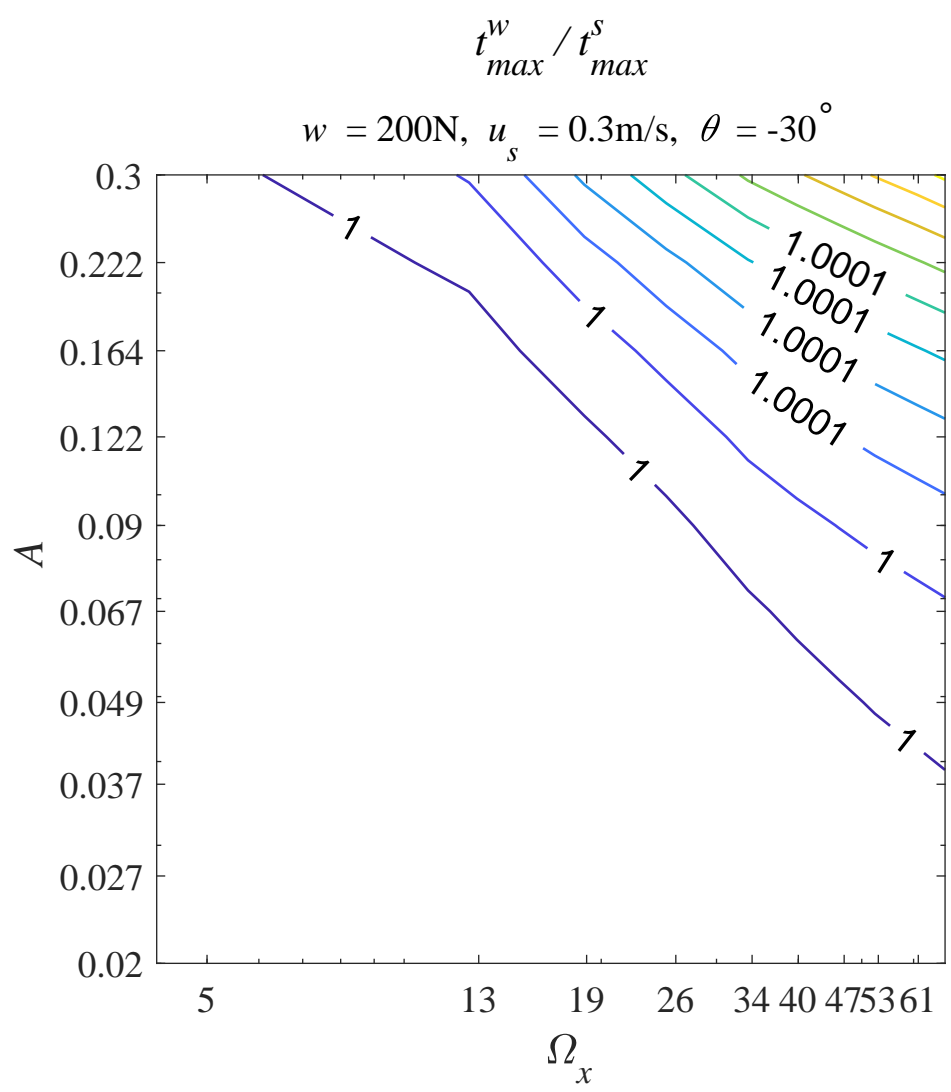

Supplement: s1 [file s1]

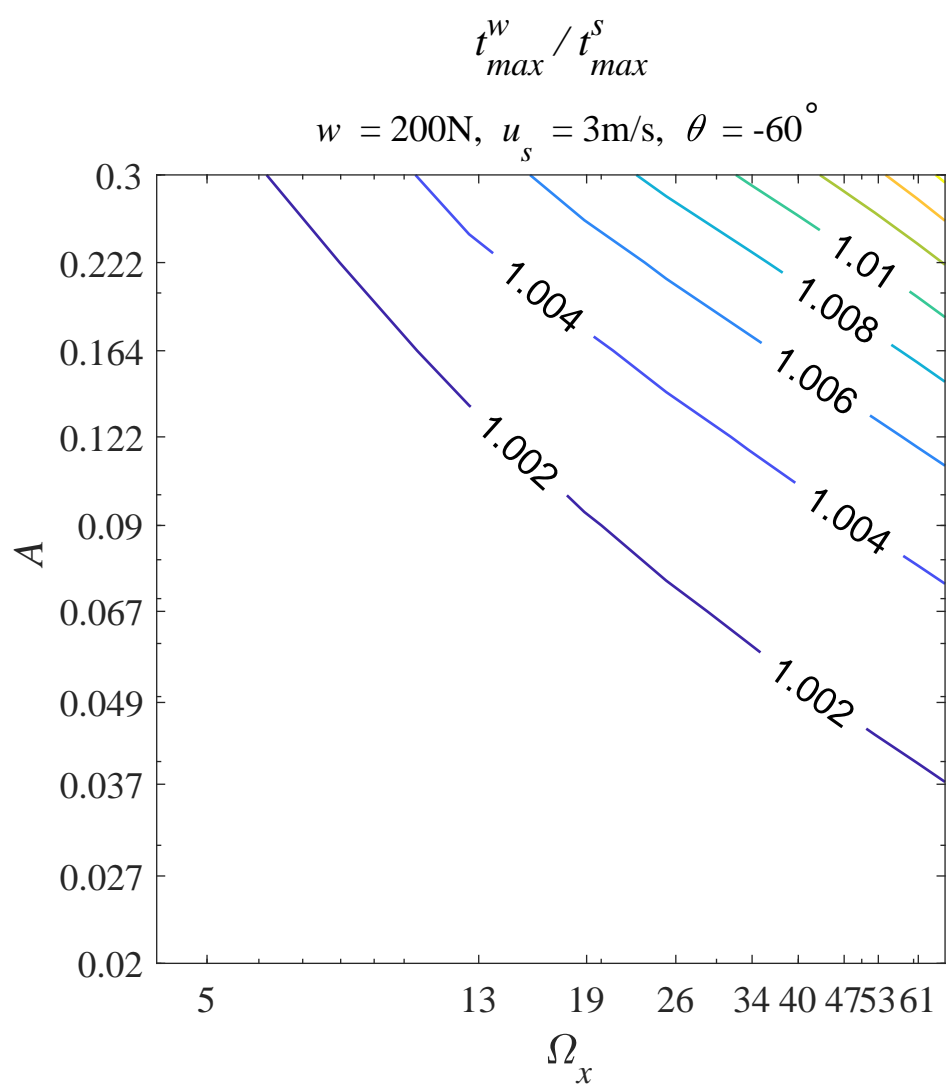

Supplement: s1 [file s1]

$$COF^w / COF^s$$

$$w = 500\text{N}, u_s = 0.3\text{m/s}, \theta = -30^\circ$$

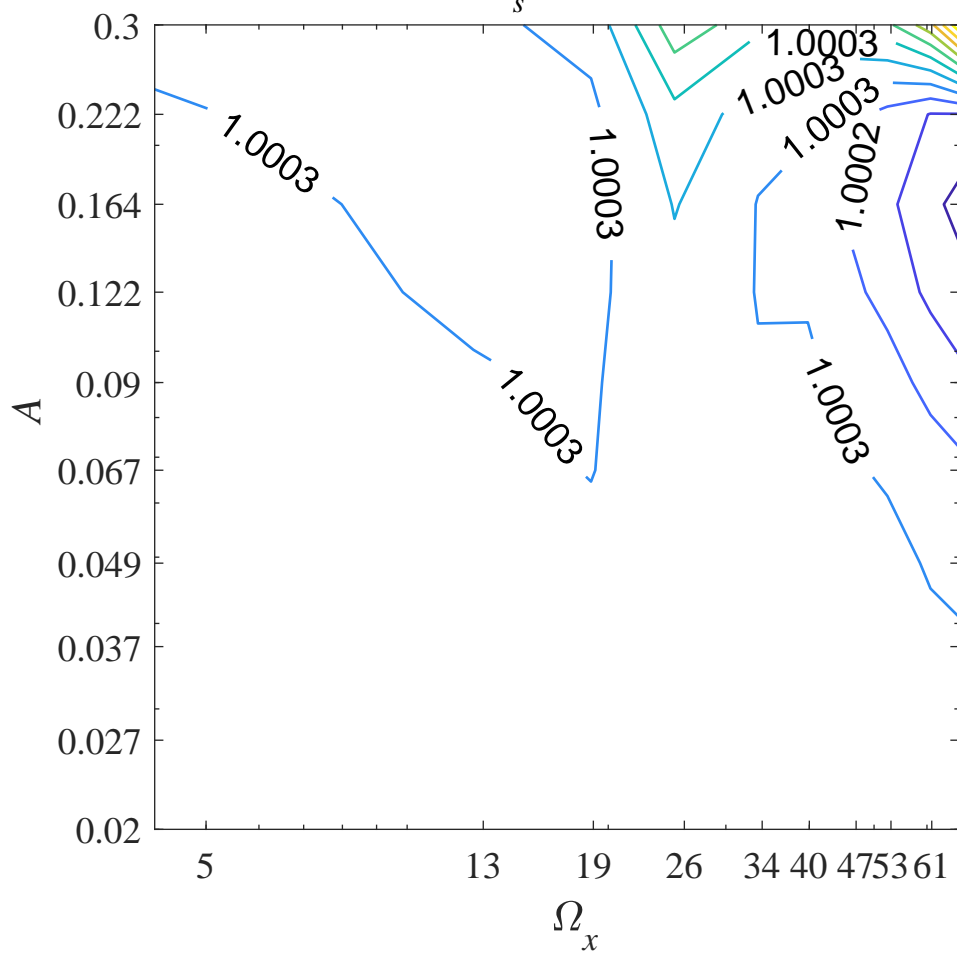

Supplement: s1 [file s1]

$$h_{cent}^w / h_{cent}^s$$

$$w = 500\text{N}, u_s = 0.3\text{m/s}, \theta = -60^\circ$$

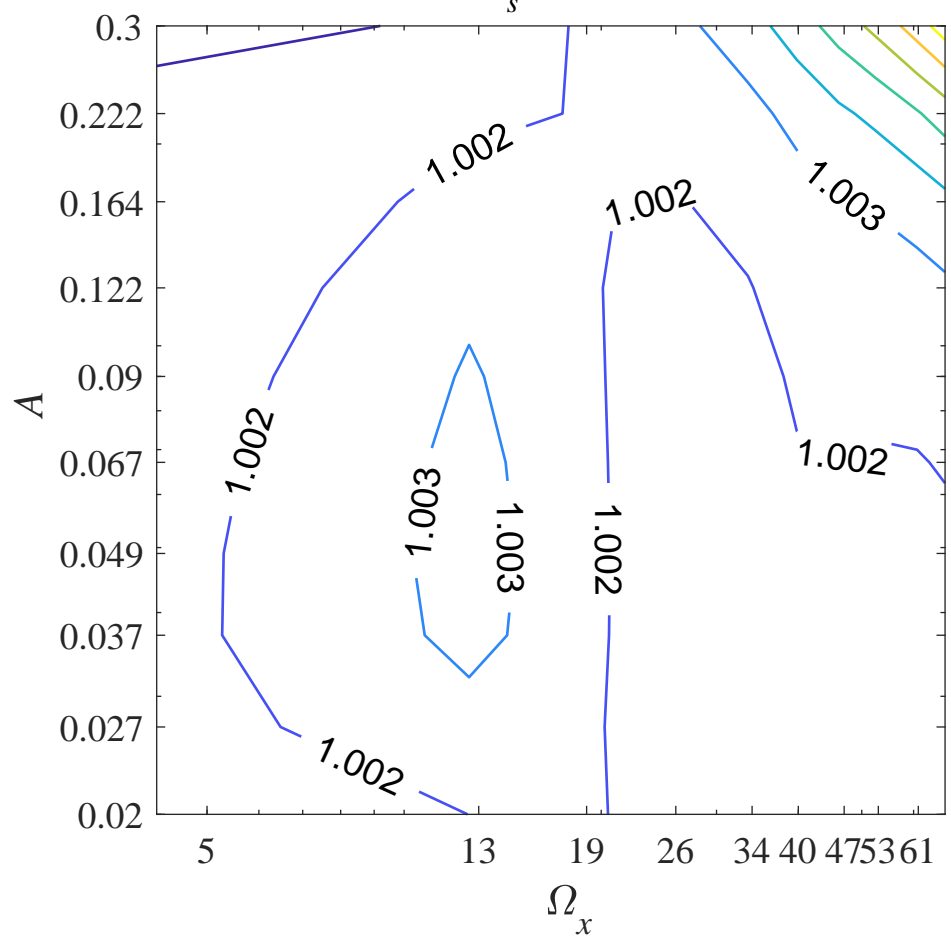

Supplement: s1 [file s1]

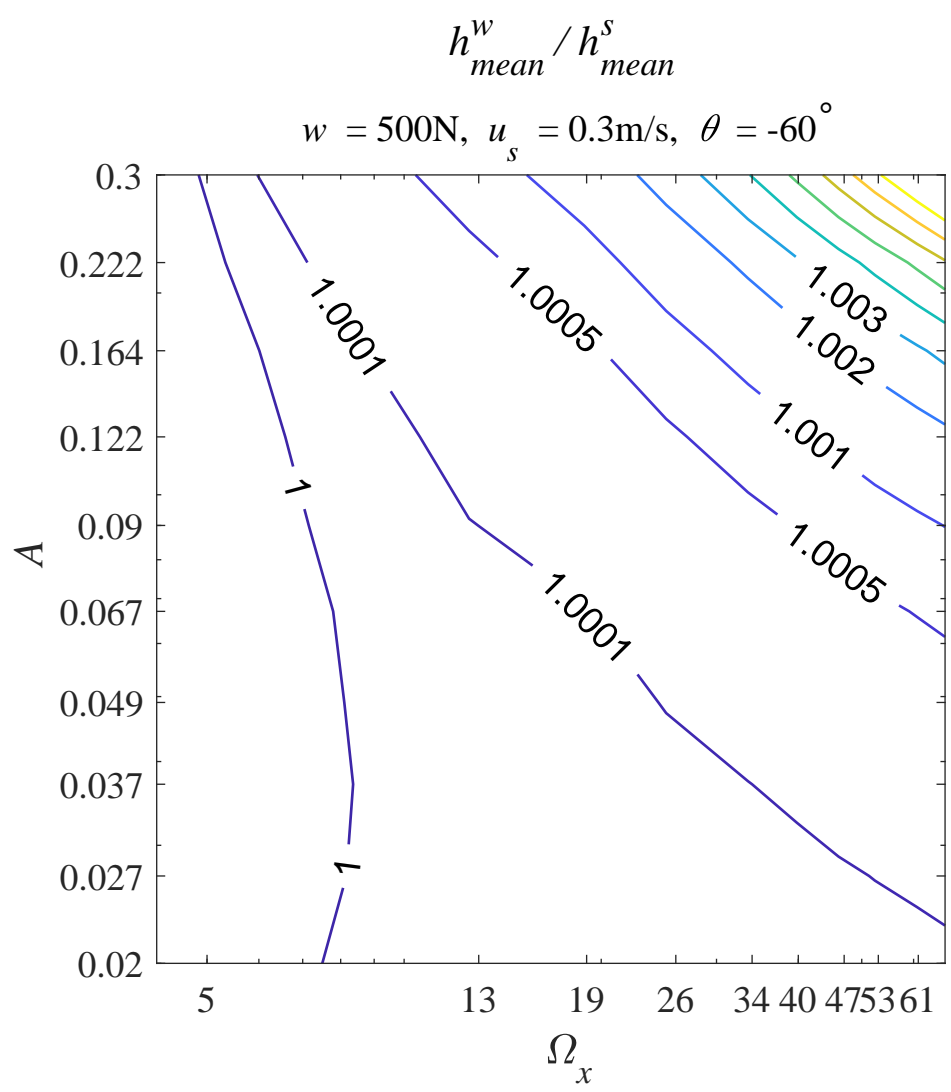

Supplement: s1 [file s1]

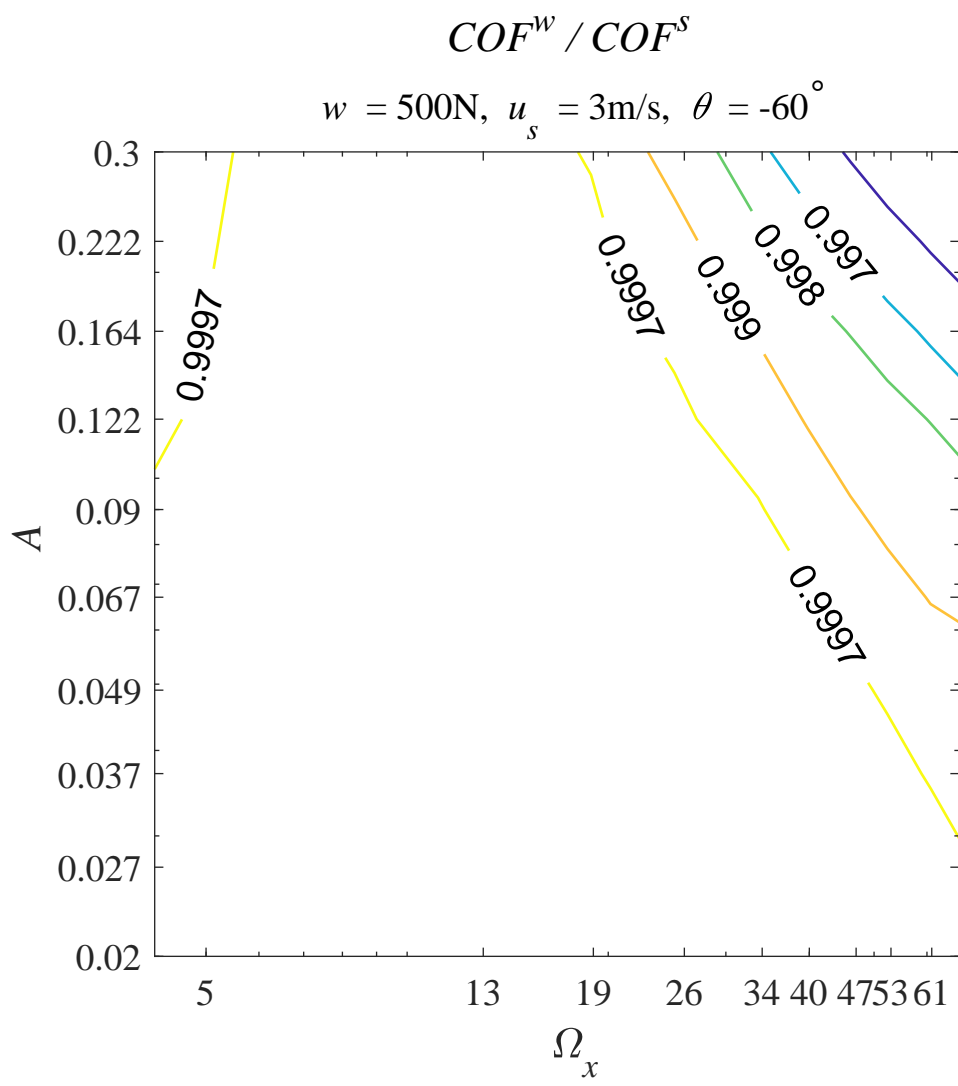

Supplement: s1 [file s1]

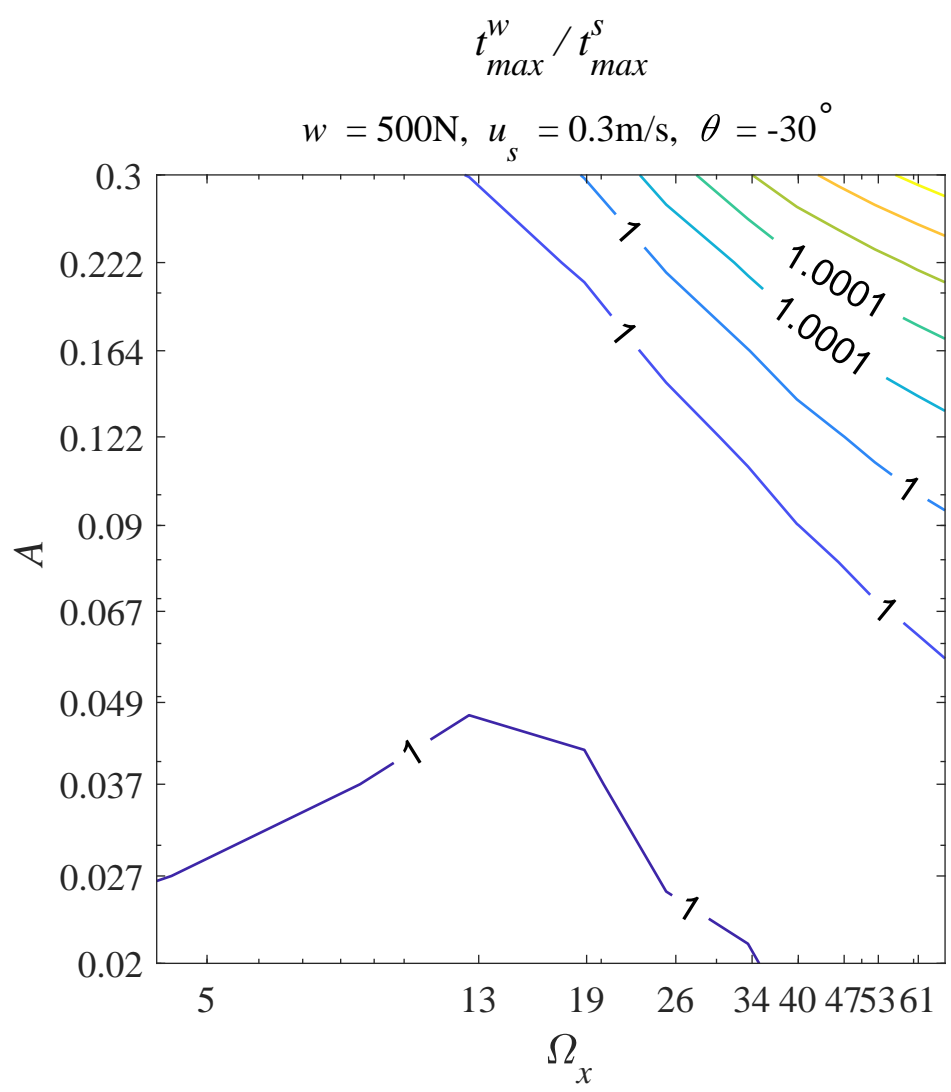

Supplement: s1 [file s1]

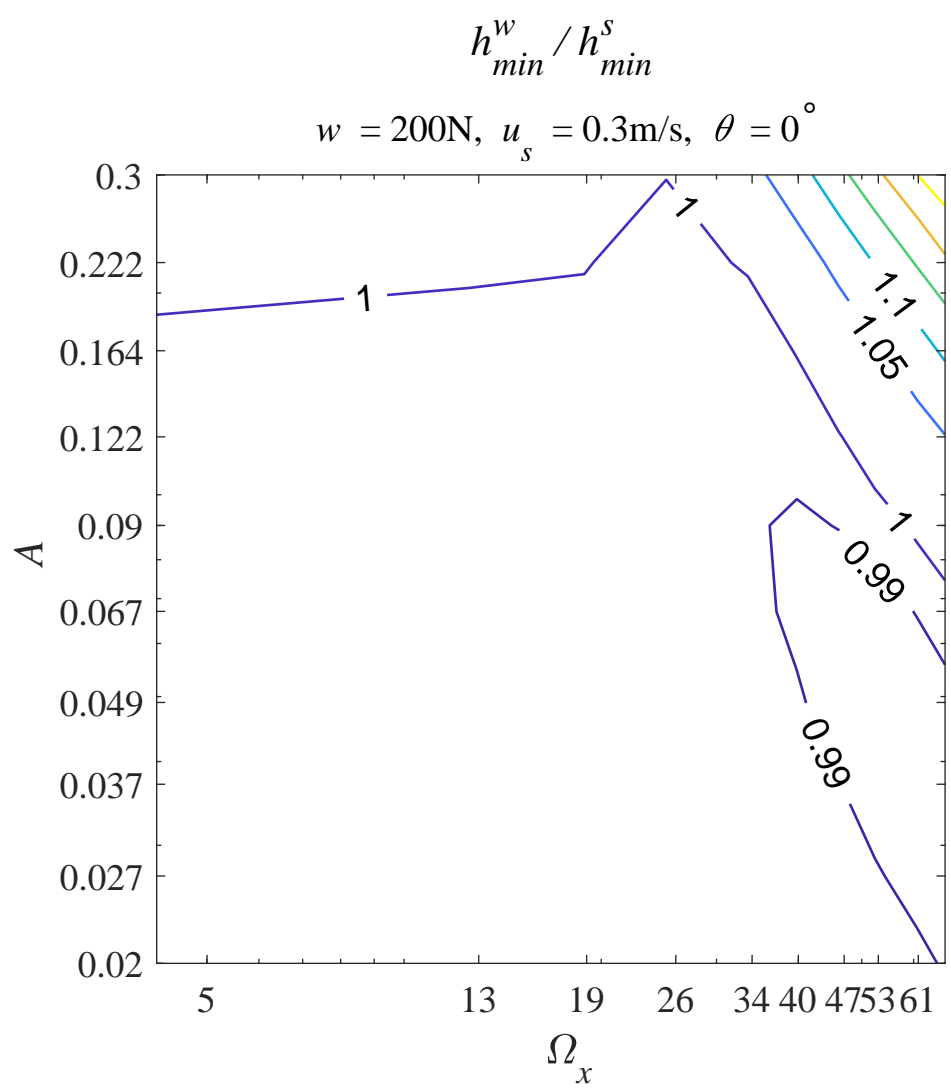

Supplement: s1 [file s1]

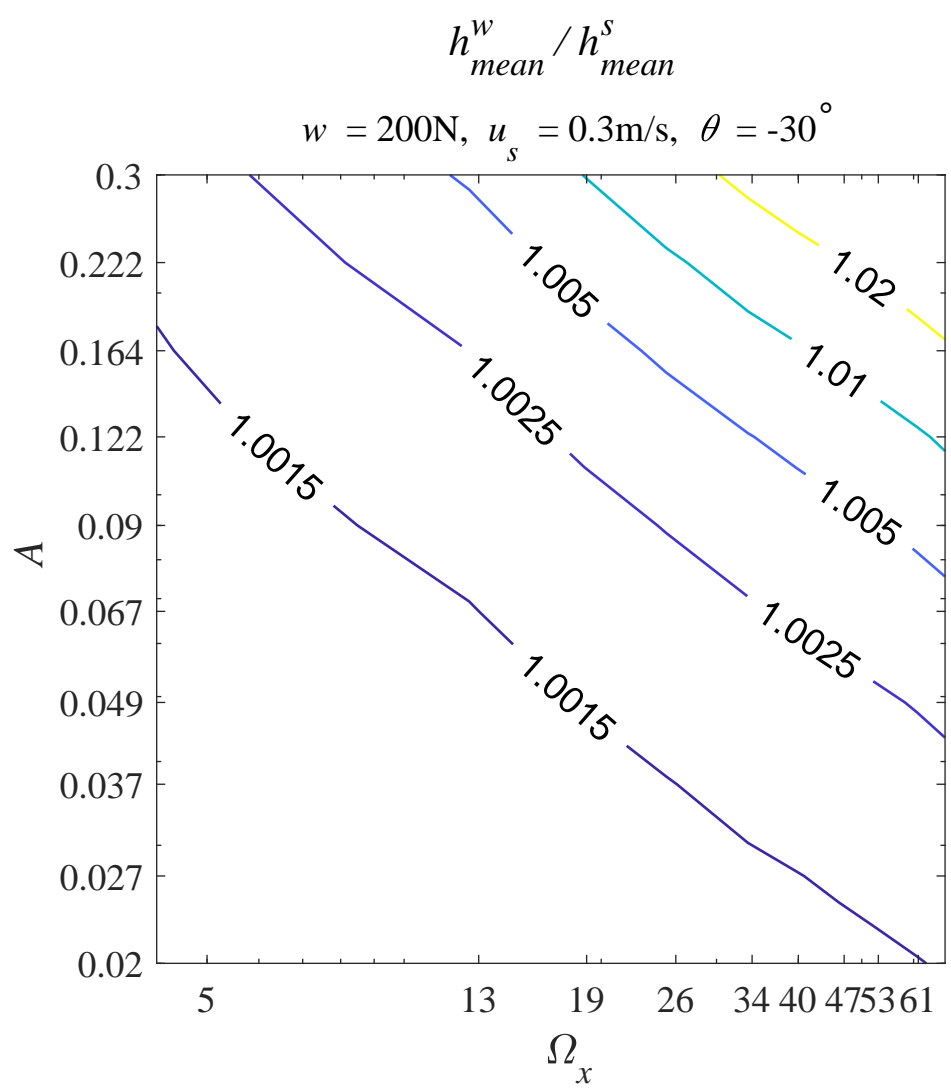

Supplement: s1 [file s1]

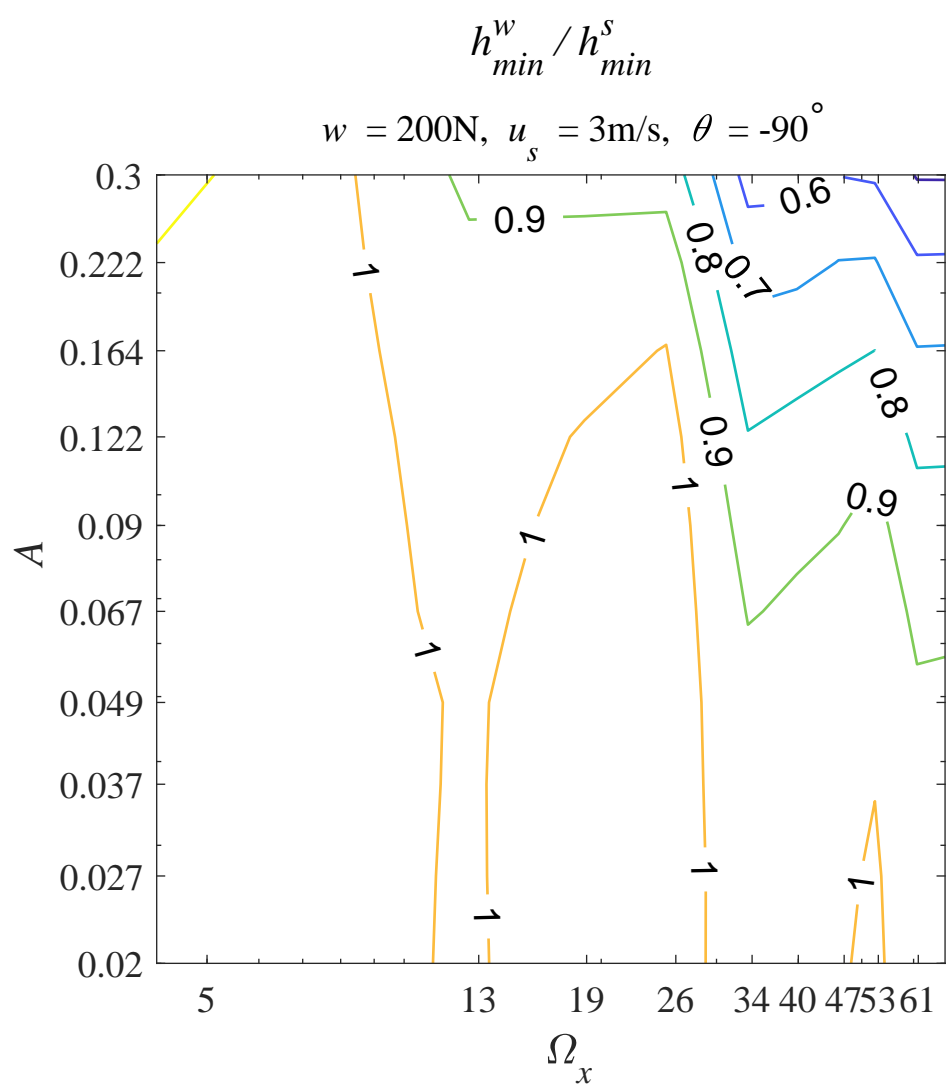

Supplement: s1 [file s1]

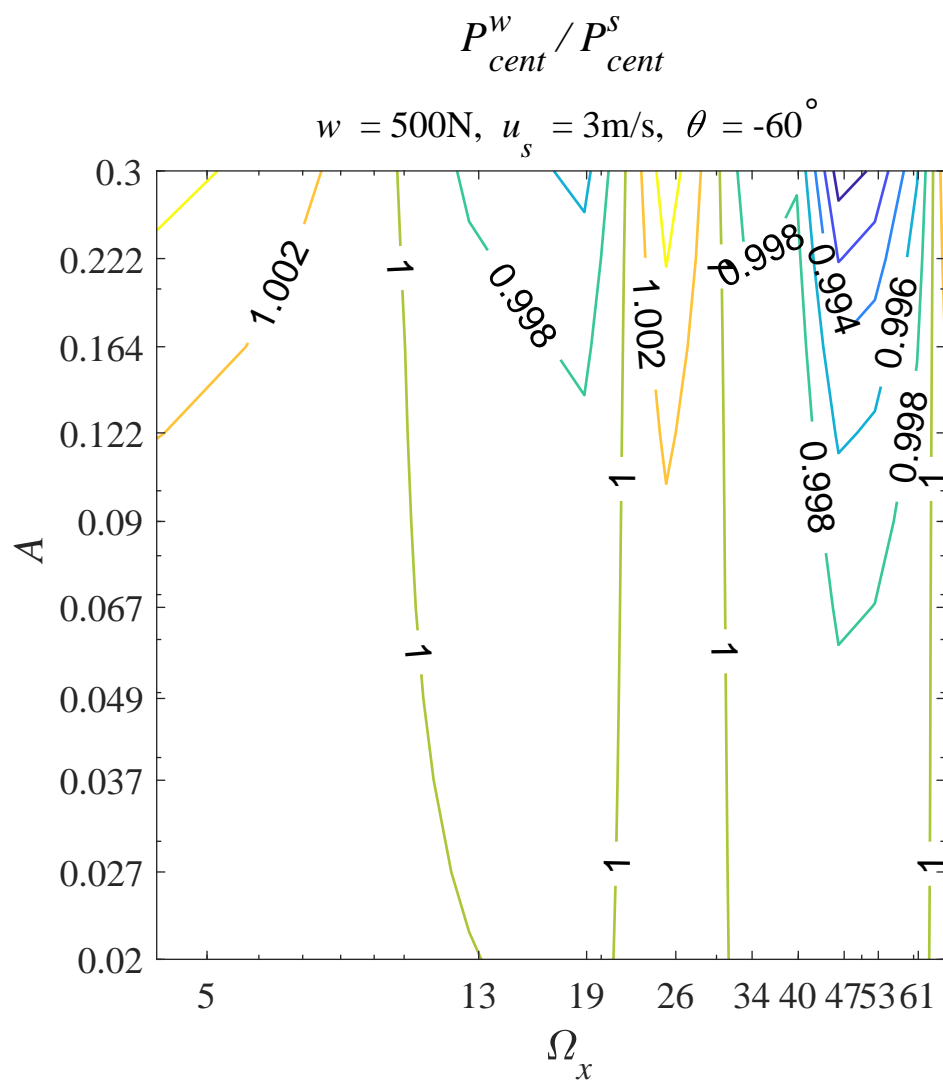

Supplement: s1 [file s1]

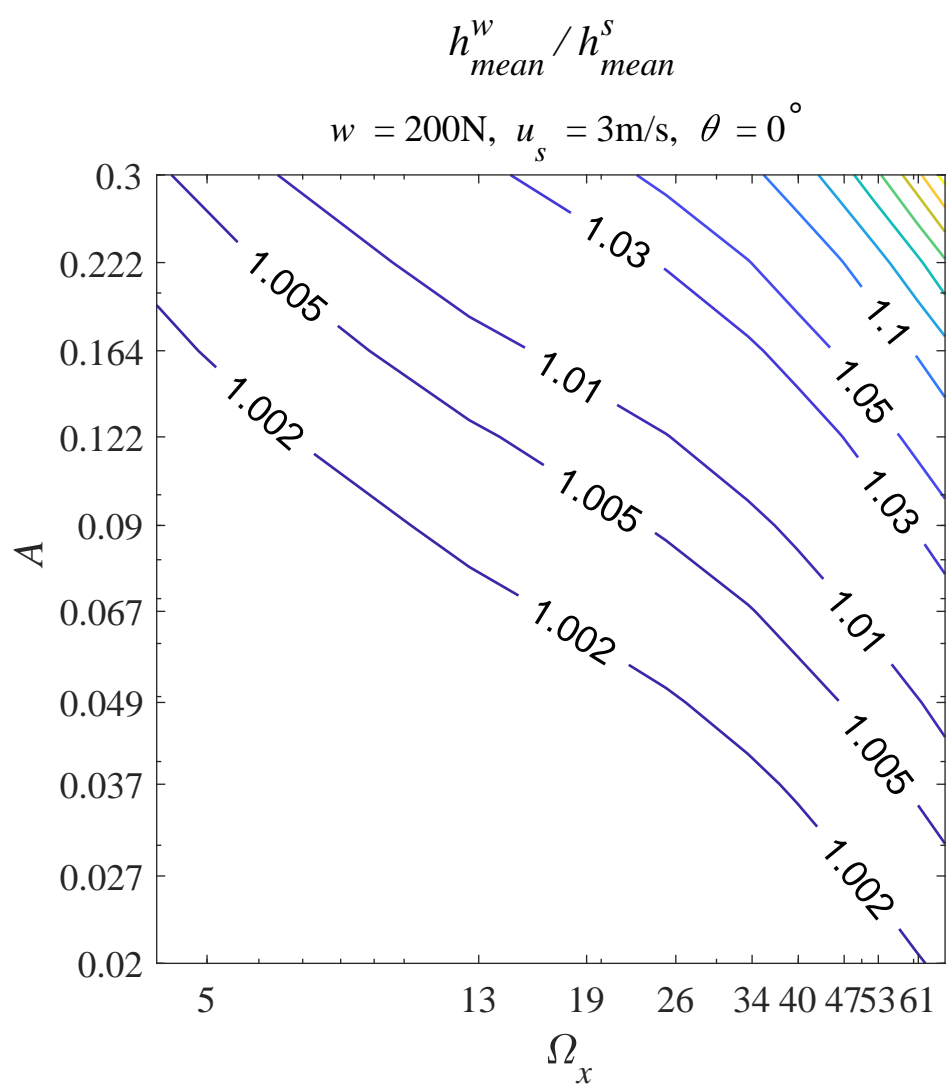

Supplement: s1 [file s1]

$$h_{min}^w / h_{min}^s$$

$$w = 500\text{N}, u_s = 0.3\text{m/s}, \theta = 0^\circ$$

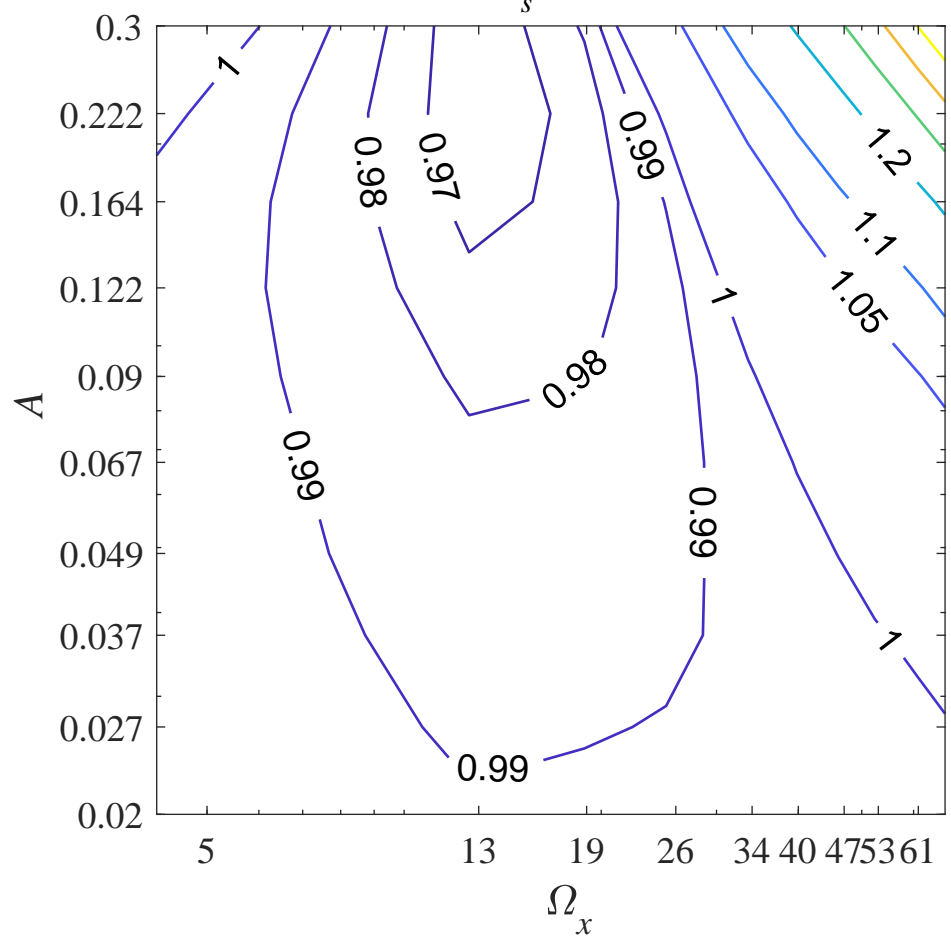

Supplement: s1 [file s1]

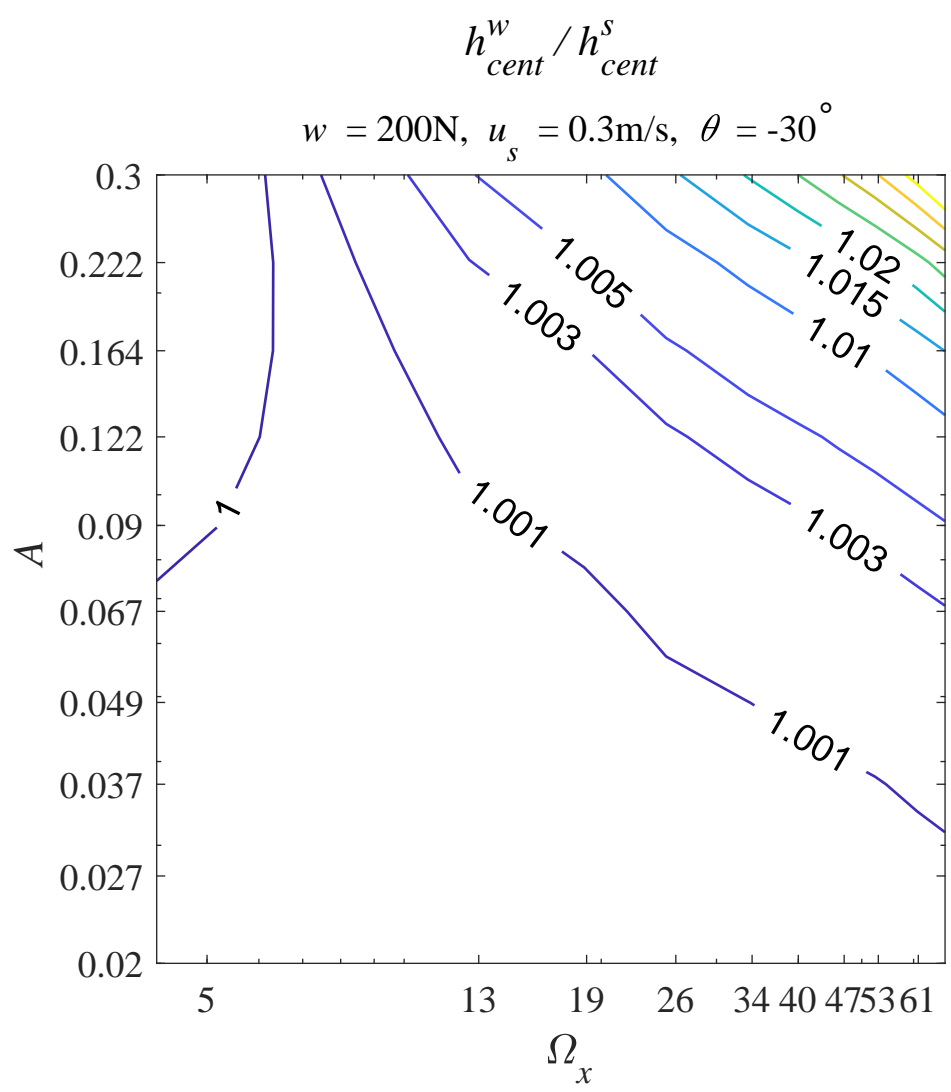

Supplement: s1 [file s1]

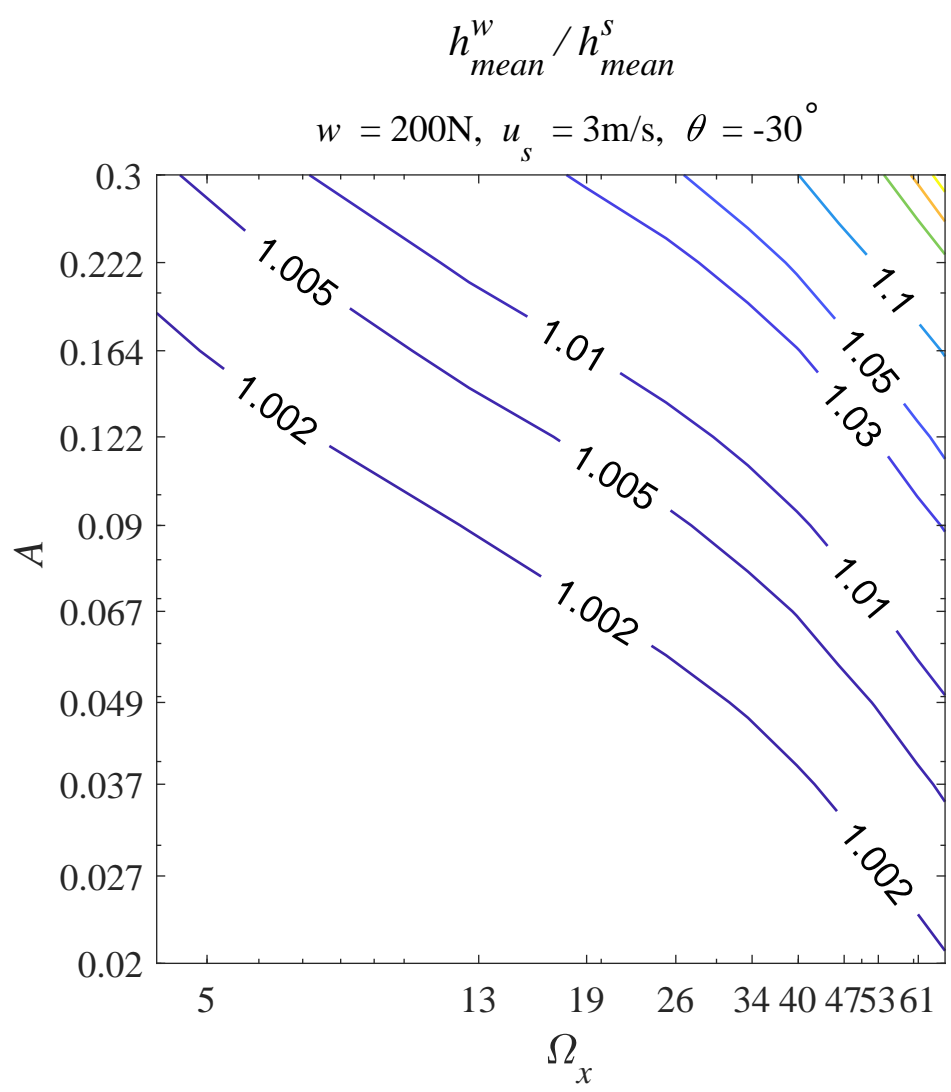

Supplement: s1 [file s1]

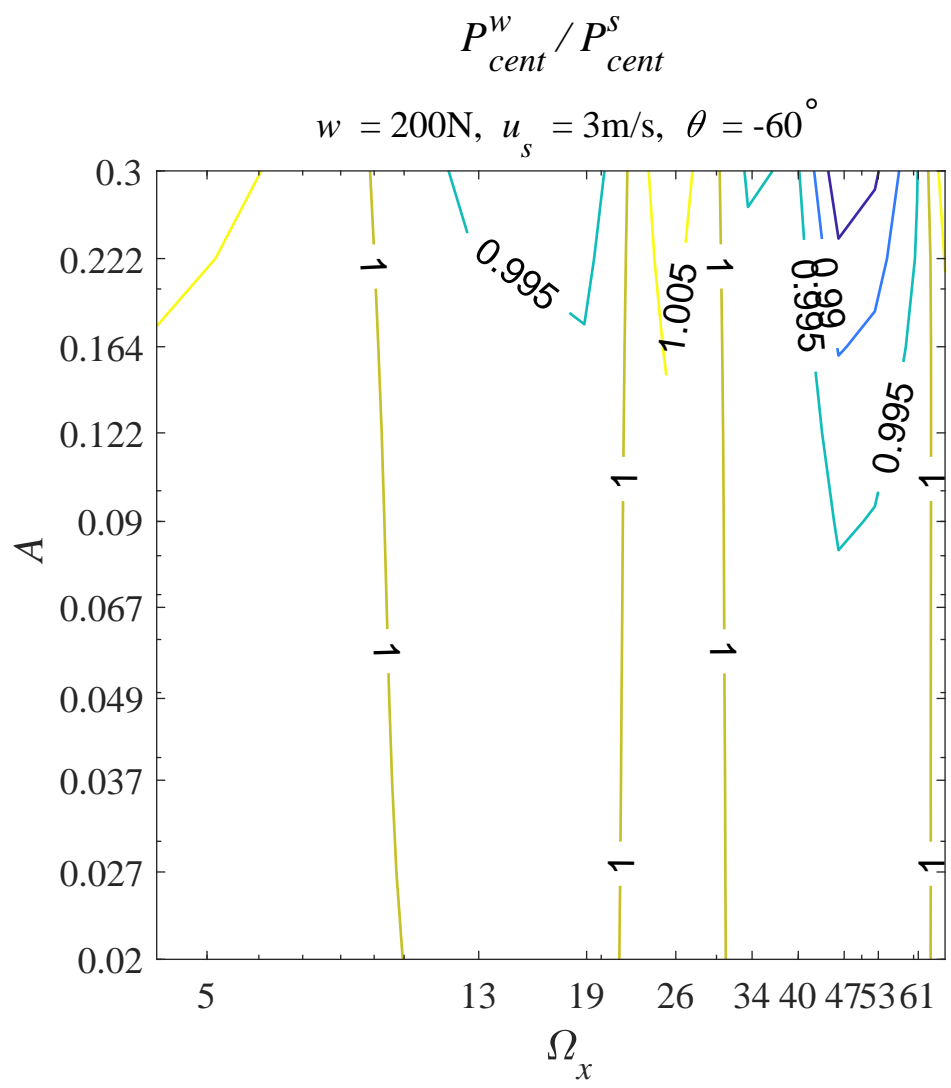

Supplement: s1 [file s1]

$$P_{max}^w / P_{max}^s$$

$$w = 500\text{N}, u_s = 3\text{m/s}, \theta = -60^\circ$$

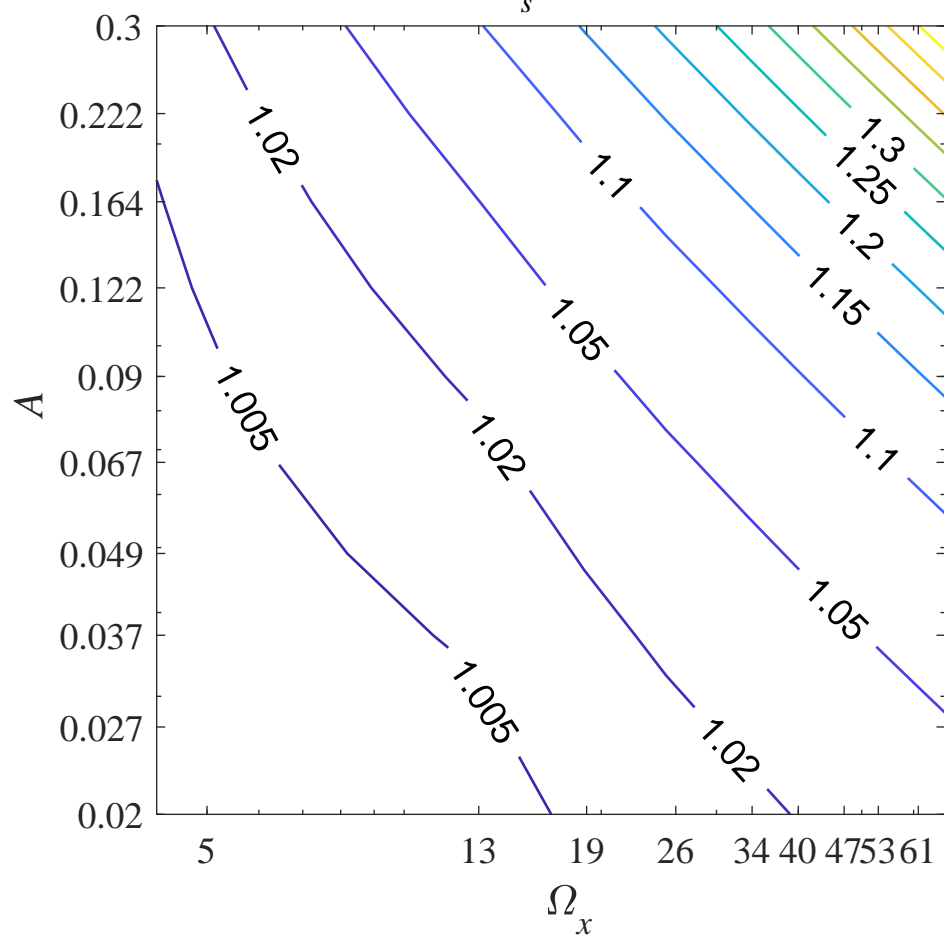

Supplement: s1 [file s1]

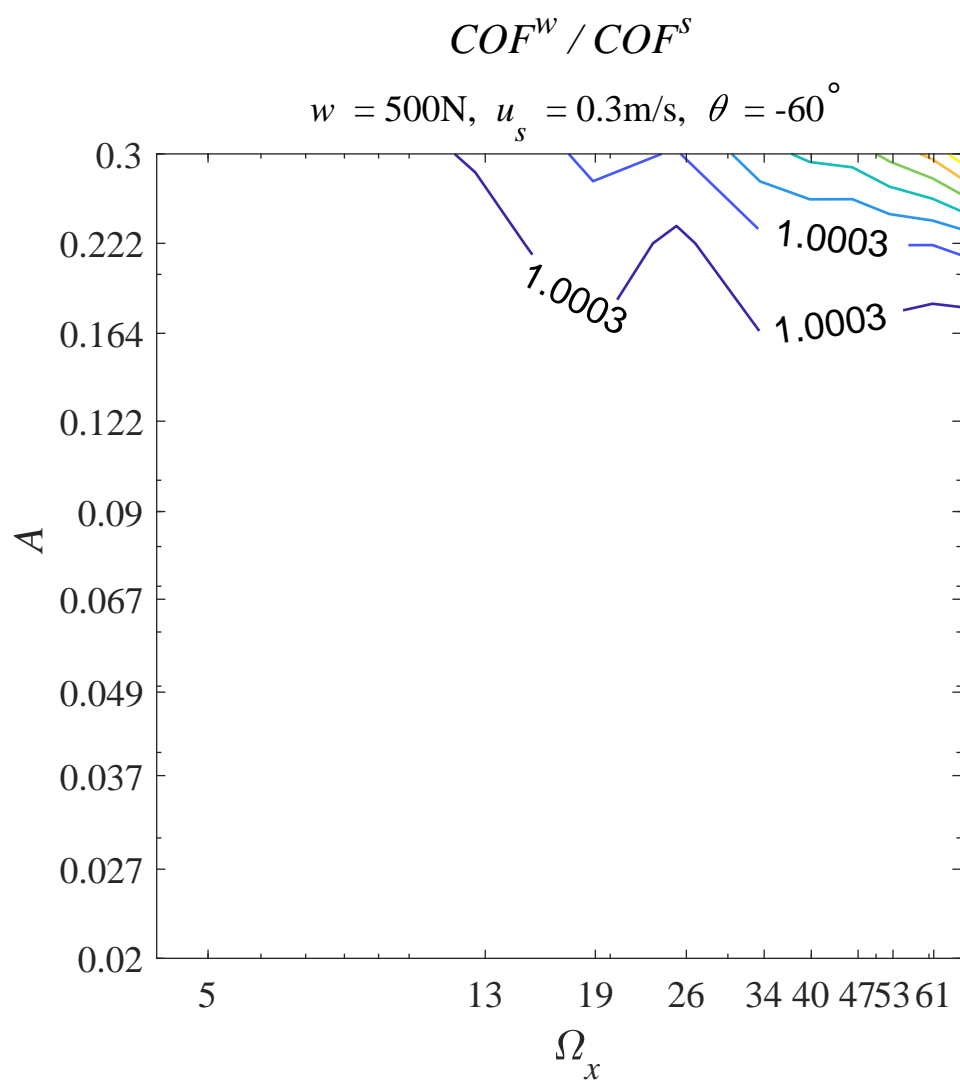

Supplement: s1 [file s1]

$$h_{min}^w / h_{min}^s$$

$$w = 200\text{N}, u_s = 0.3\text{m/s}, \theta = -60^\circ$$

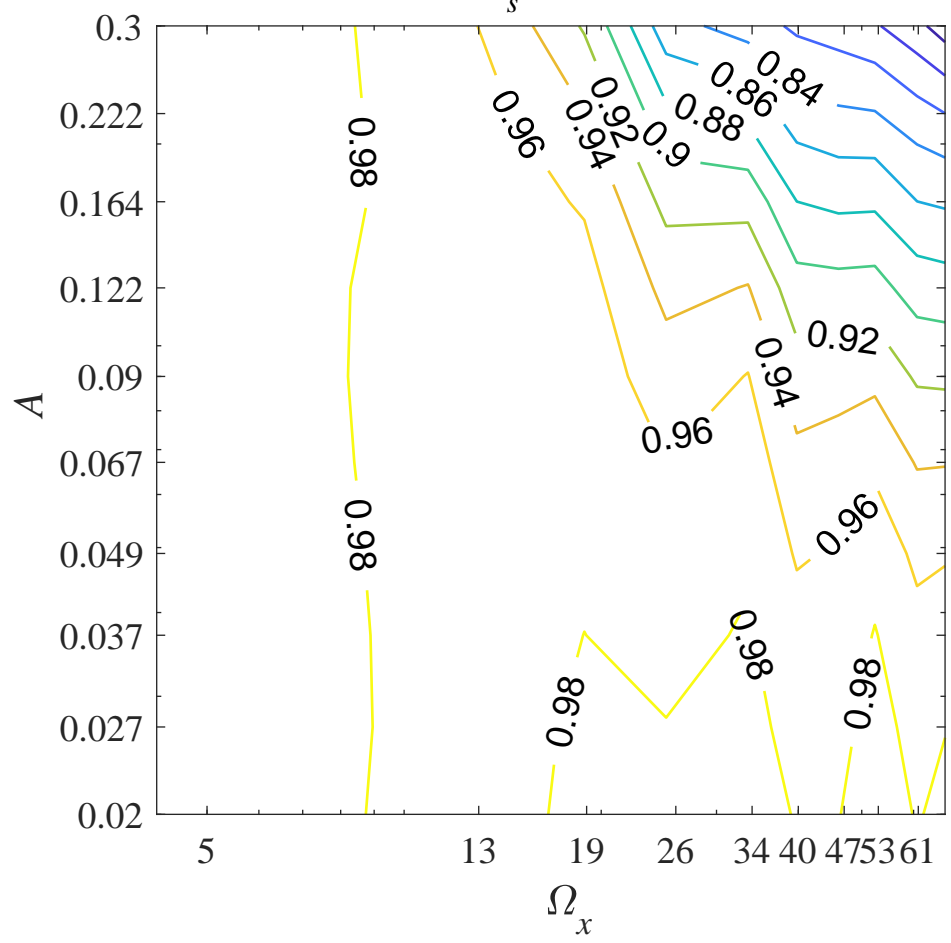

Supplement: s1 [file s1]

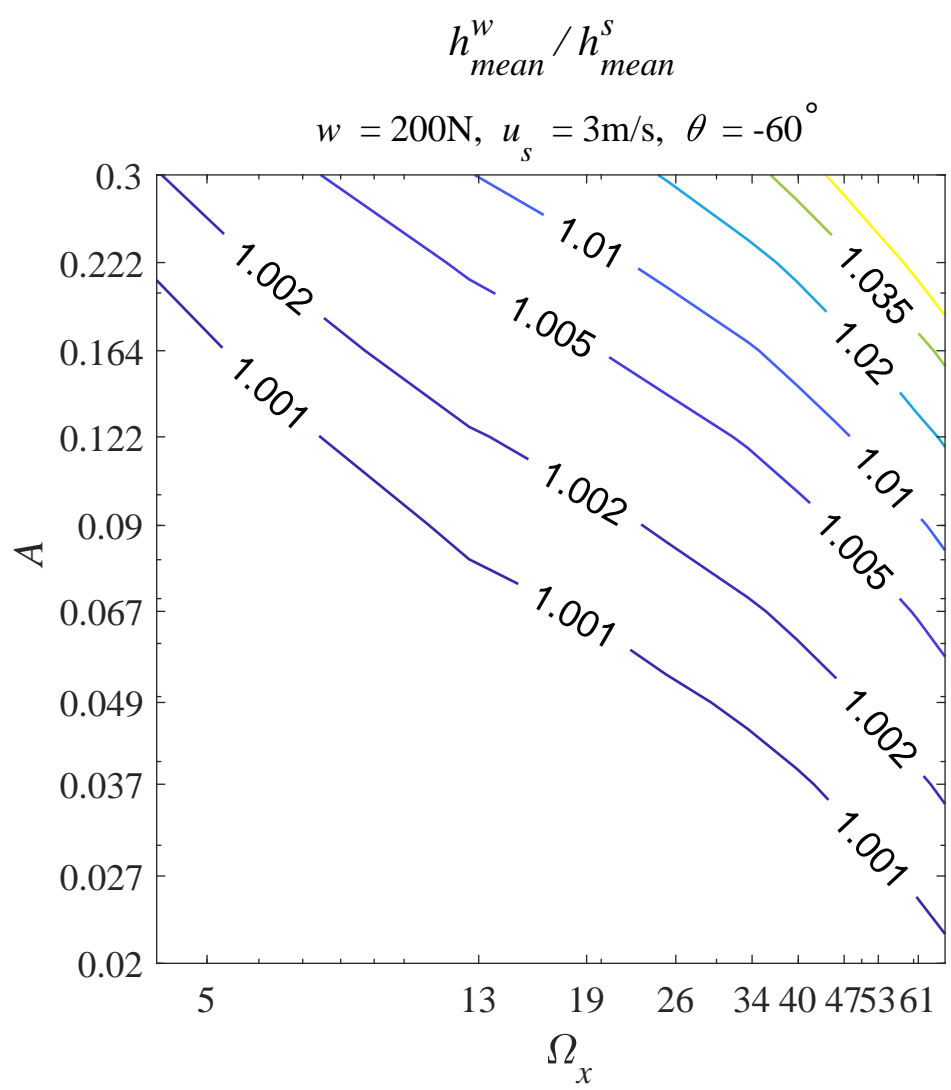

Supplement: s1 [file s1]

$$P_{max}^w / P_{max}^s$$

$$w = 500\text{N}, u_s = 0.3\text{m/s}, \theta = 0^\circ$$

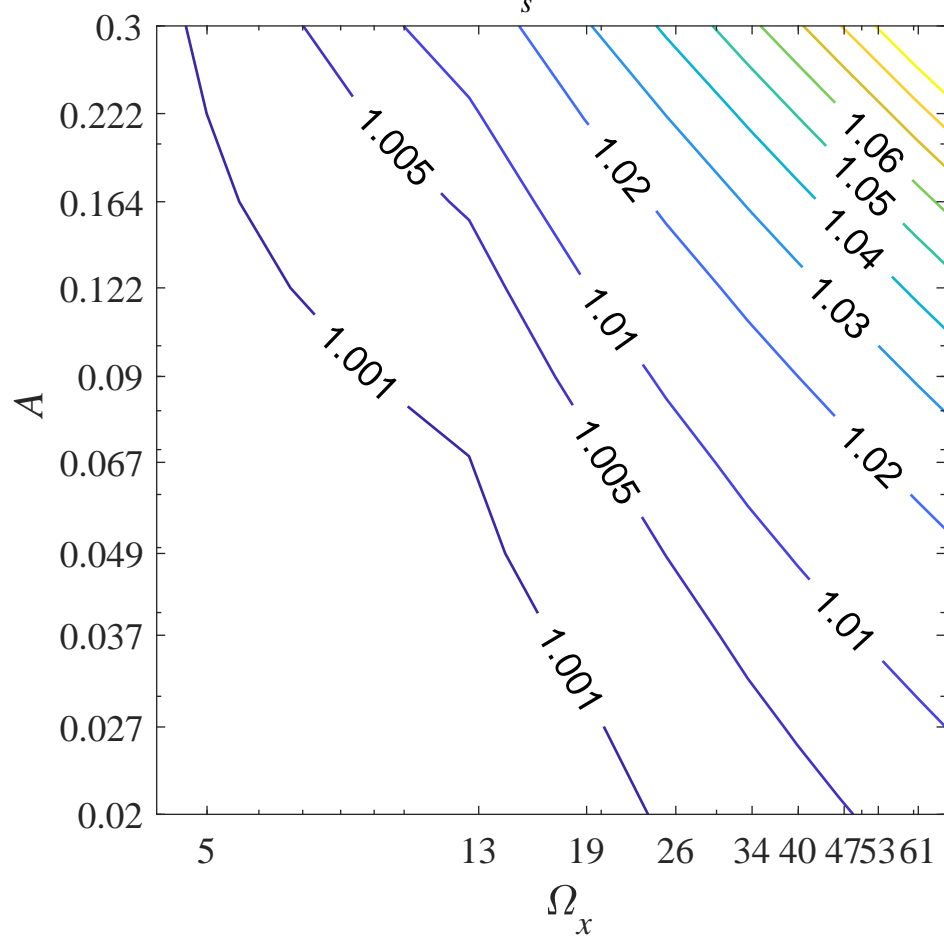

Supplement: s1 [file s1]

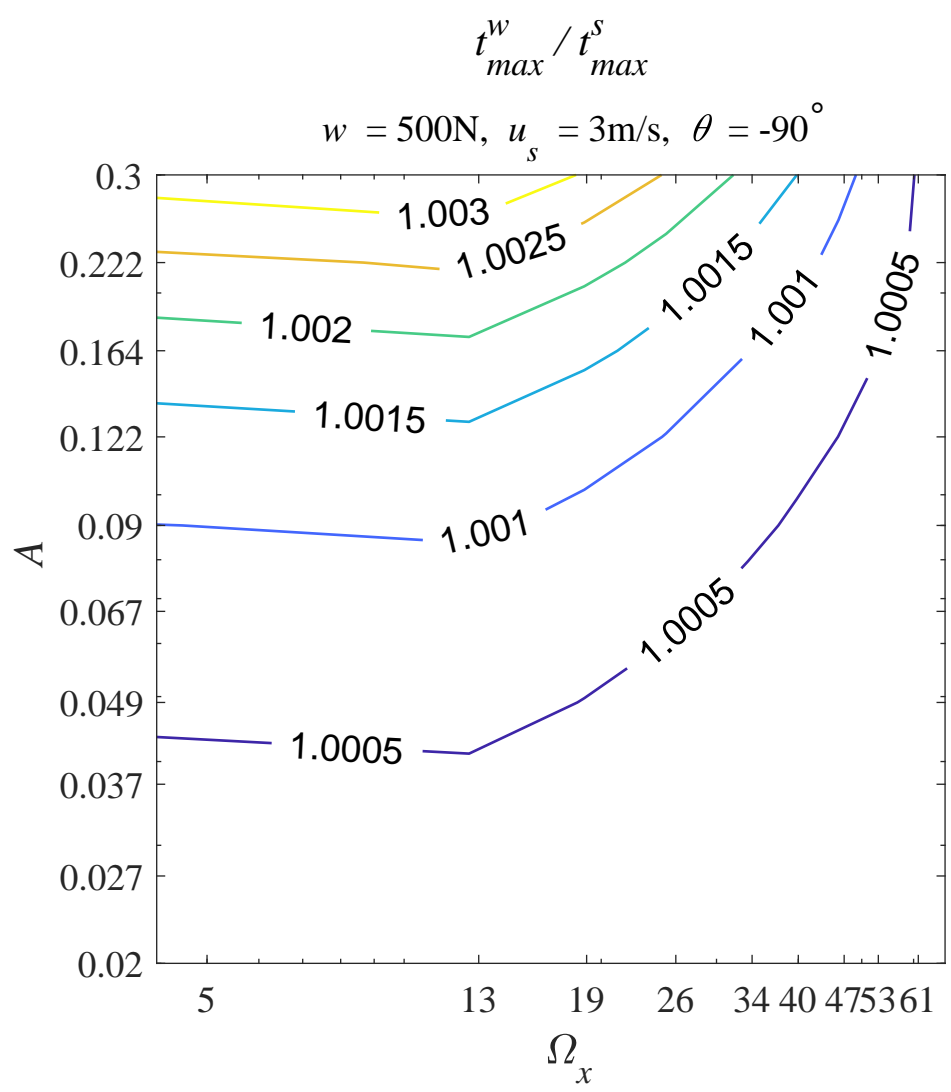

Supplement: s1 [file s1]

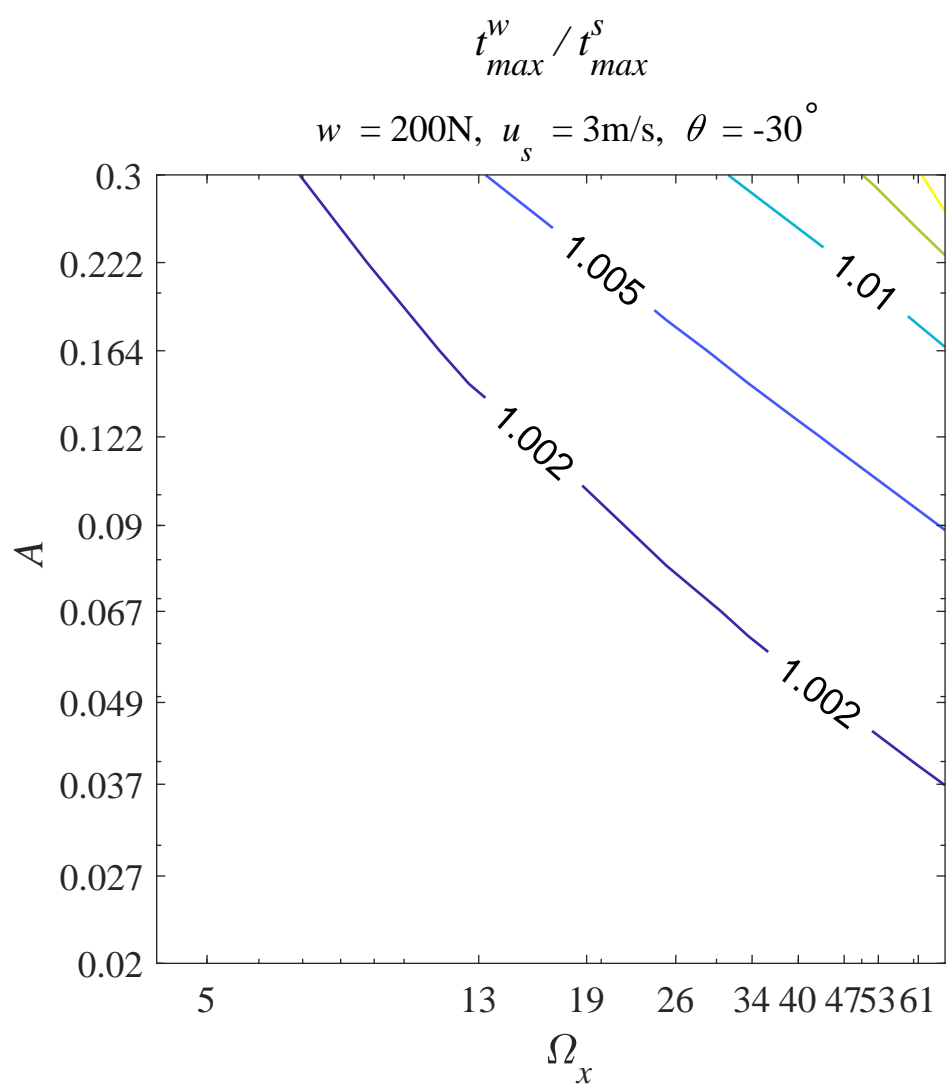

Supplement: s1 [file s1]

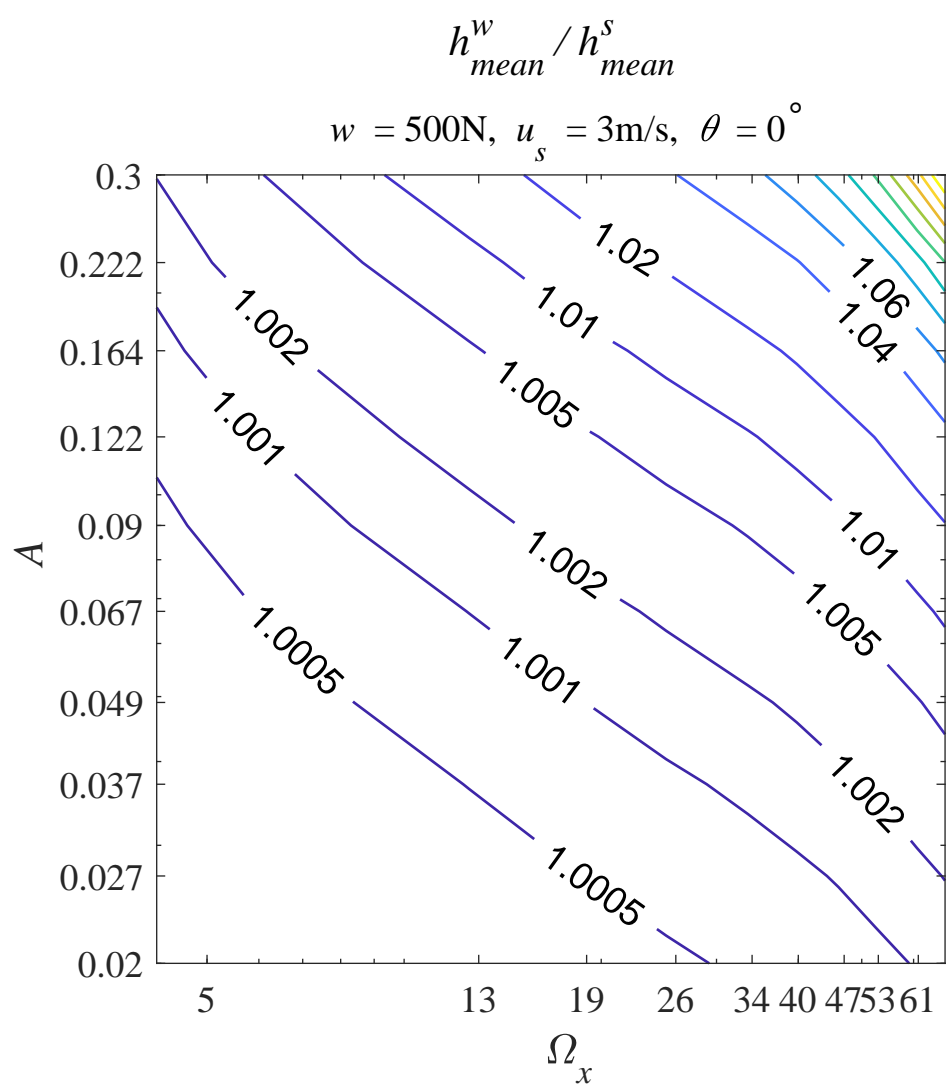

Supplement: s1 [file s1]

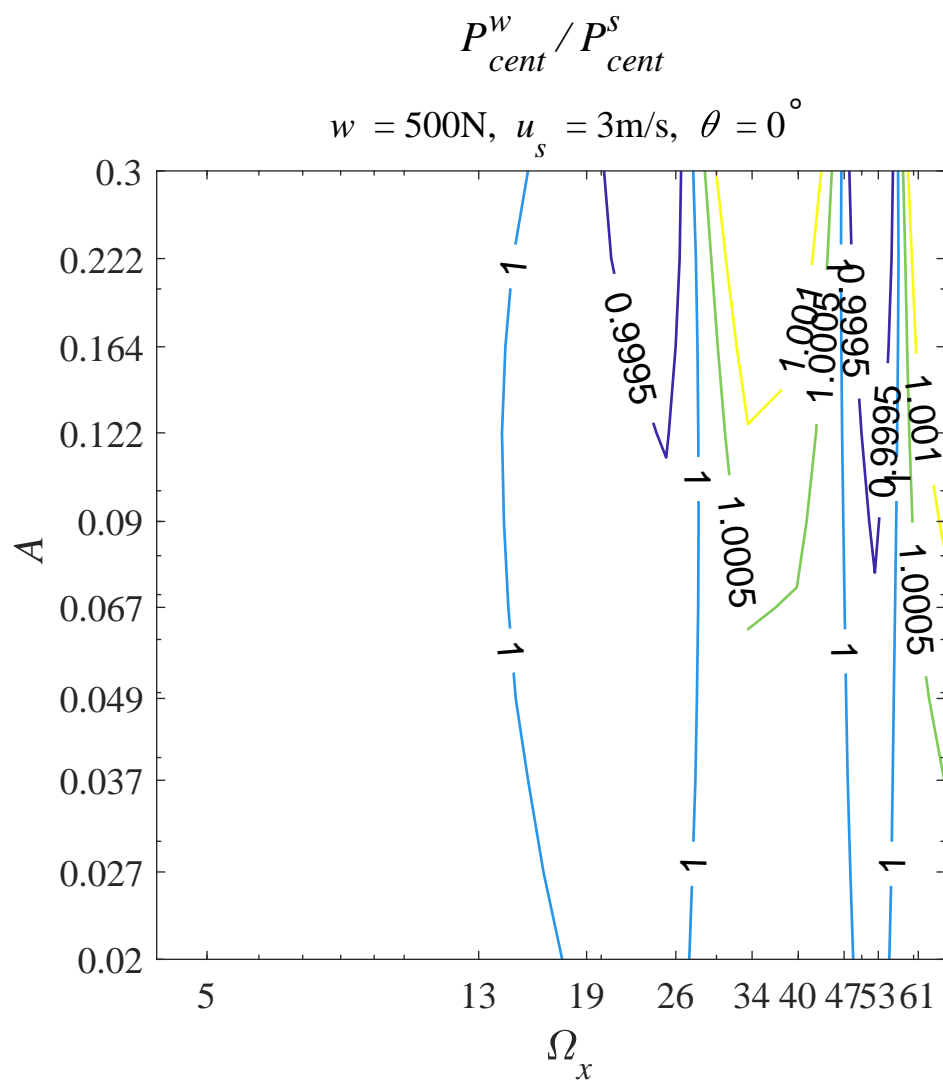

Supplement: s1 [file s1]

$$P_{max}^w / P_{max}^s$$

$$w = 500\text{N}, u_s = 3\text{m/s}, \theta = -30^\circ$$

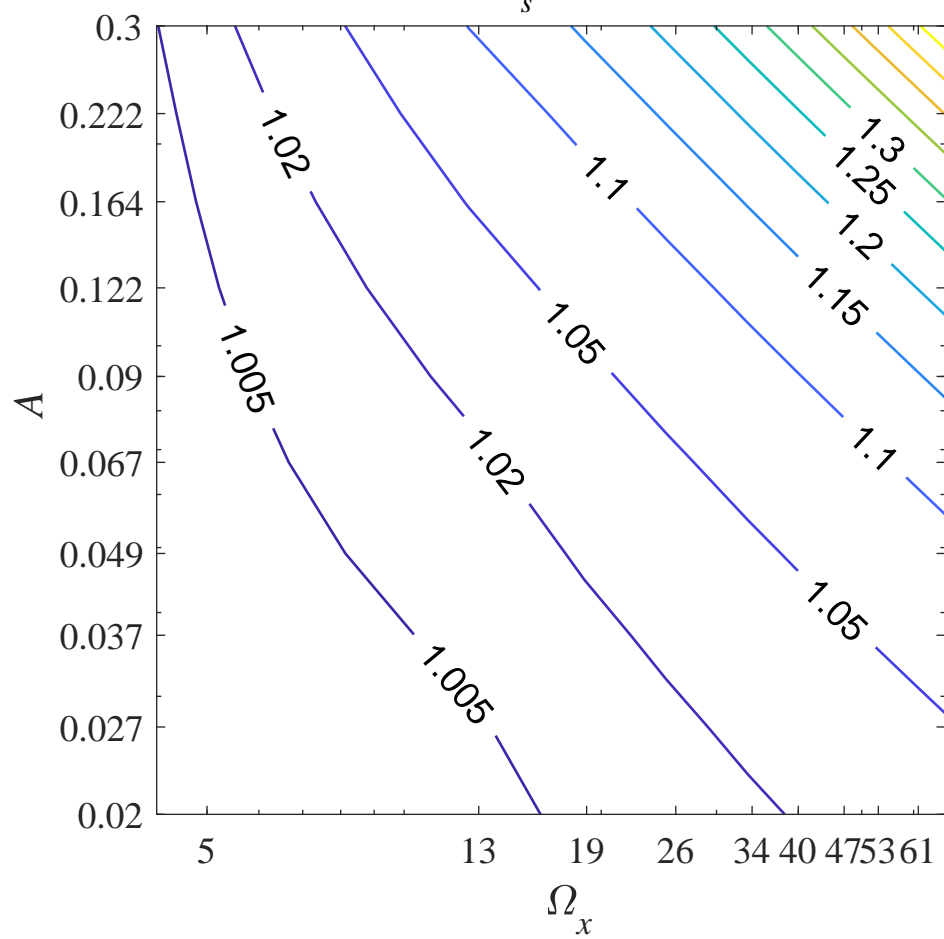

Supplement: s1 [file s1]

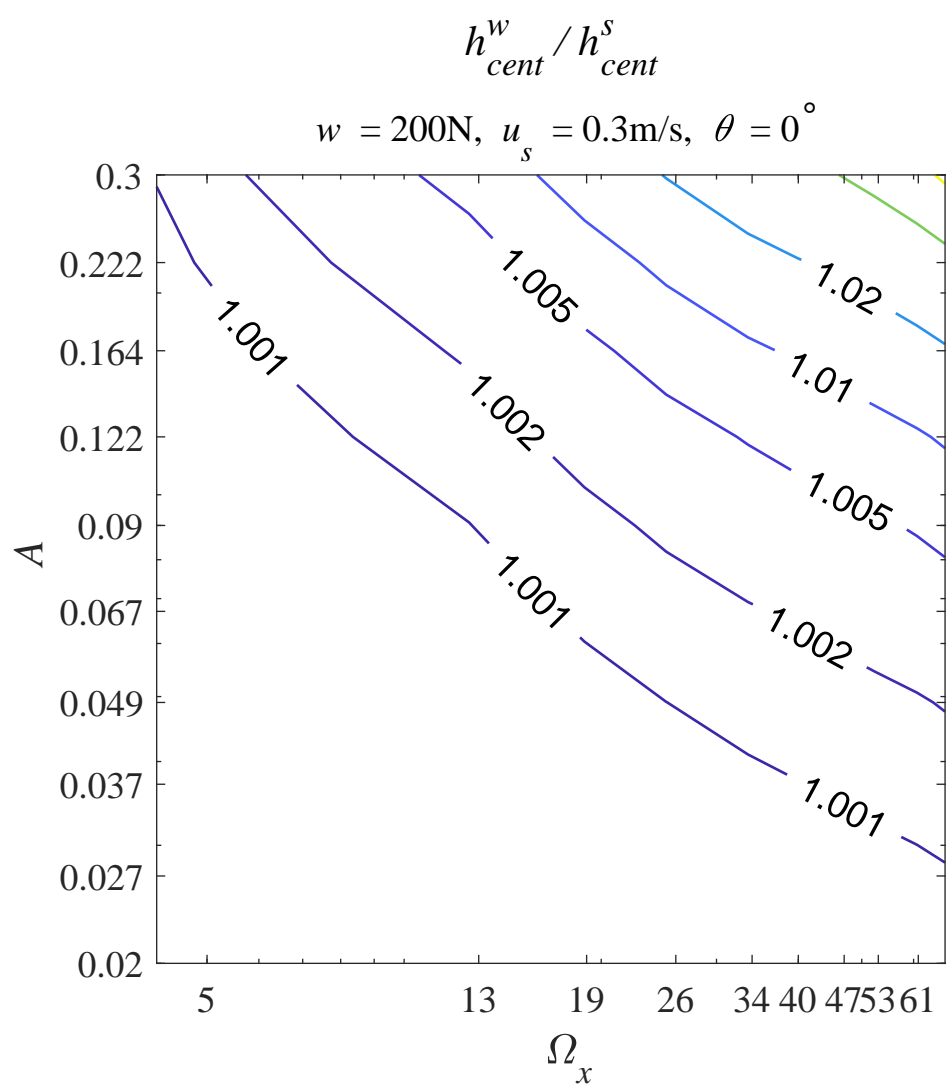

Supplement: s1 [file s1]

$$P_{cent}^w / P_{cent}^s$$

$$w = 200\text{N}, u_s = 0.3\text{m/s}, \theta = -30^\circ$$

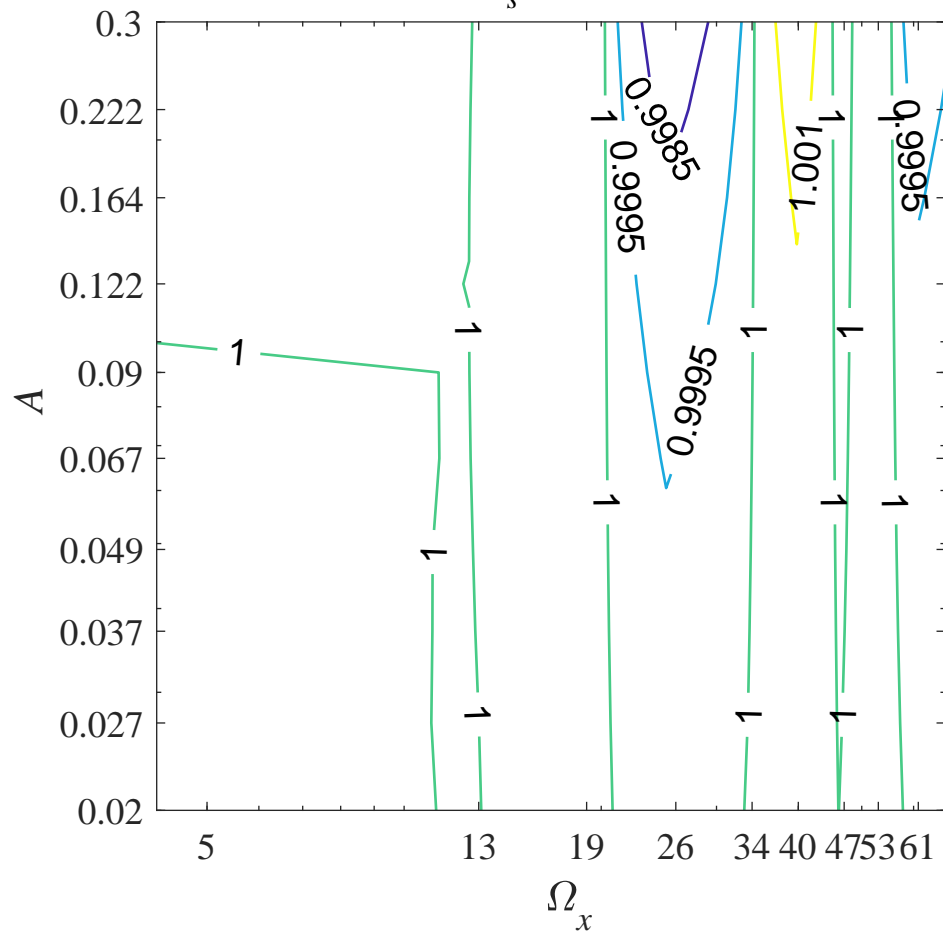

Supplement: s1 [file s1]

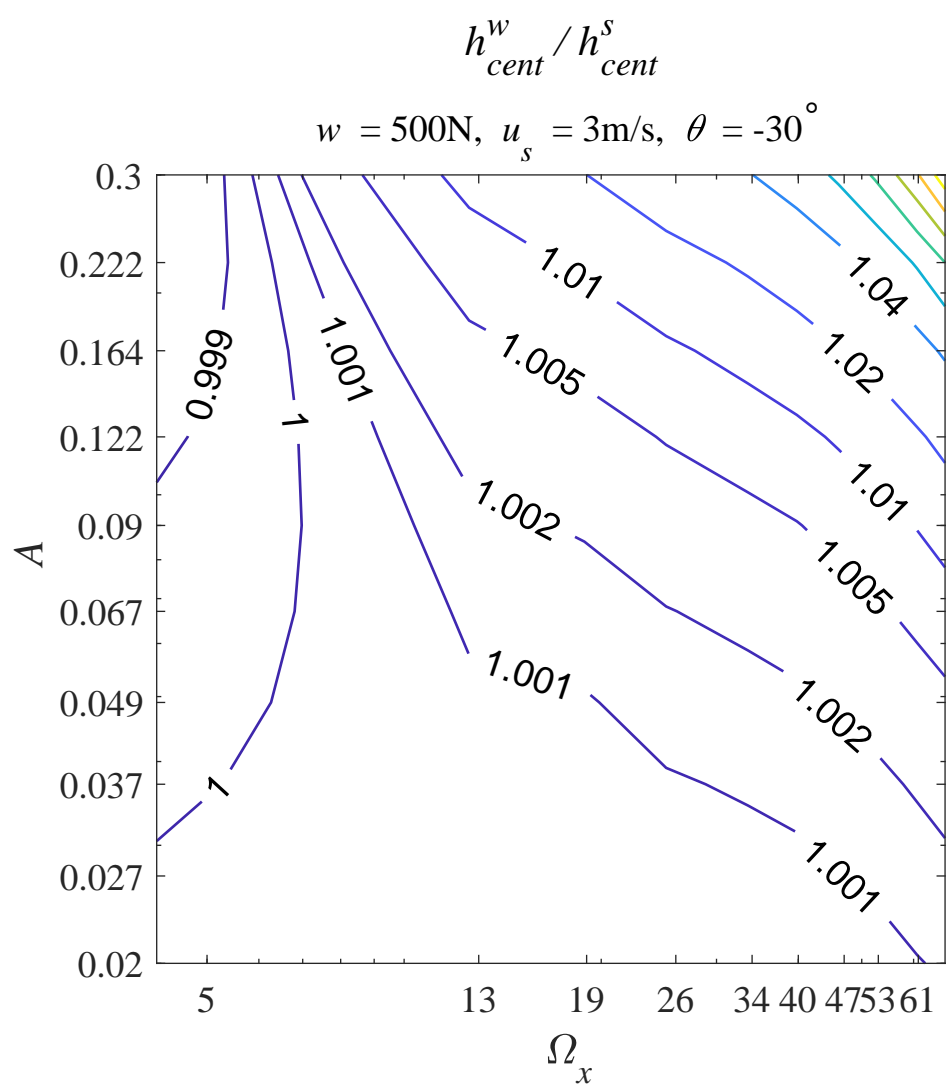

Supplement: s1 [file s1]

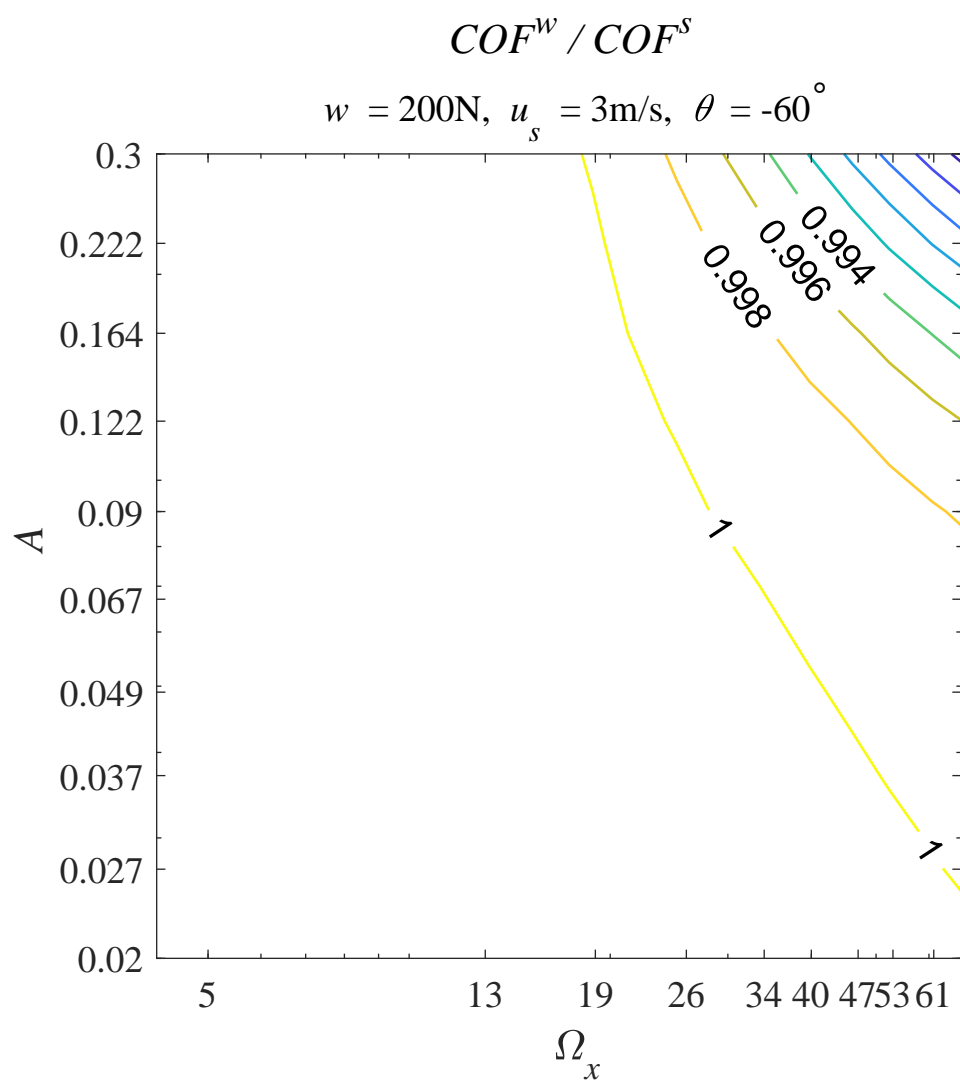

Supplement: s1 [file s1]

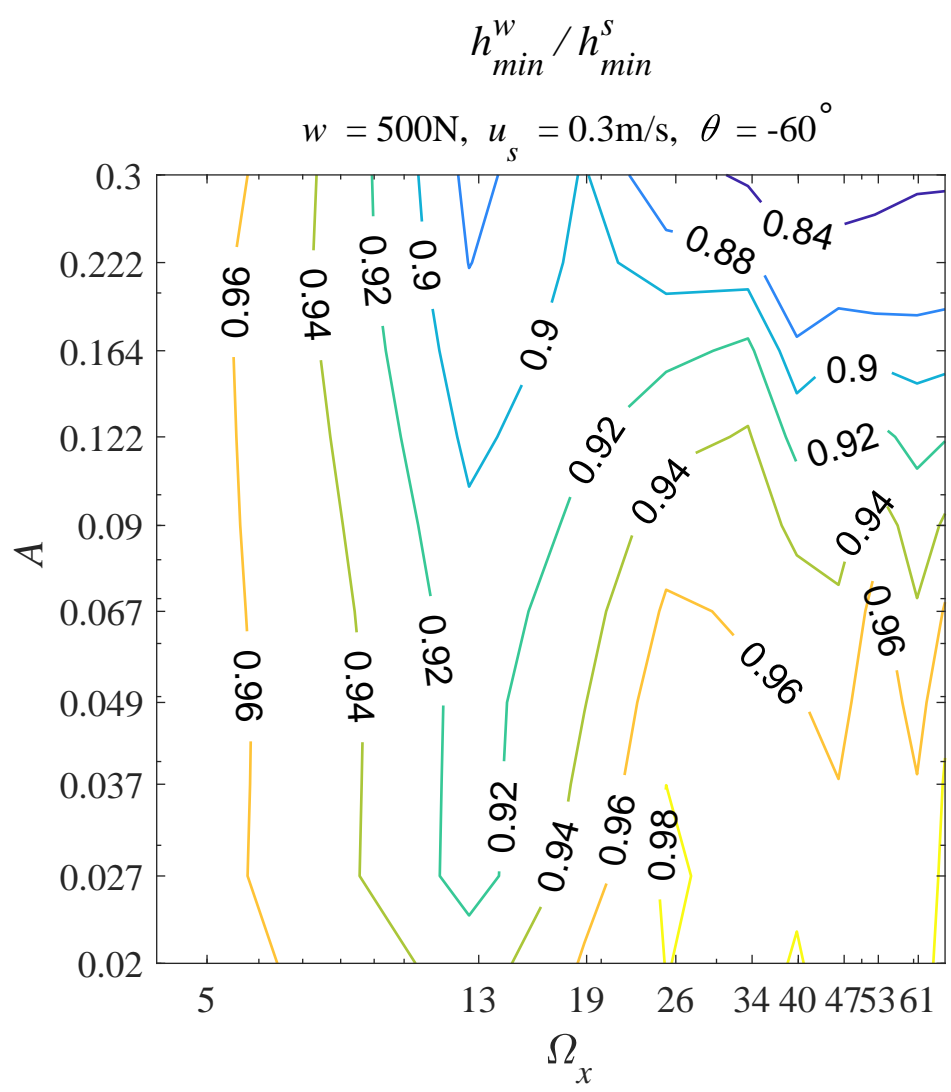

Supplement: s1 [file s1]

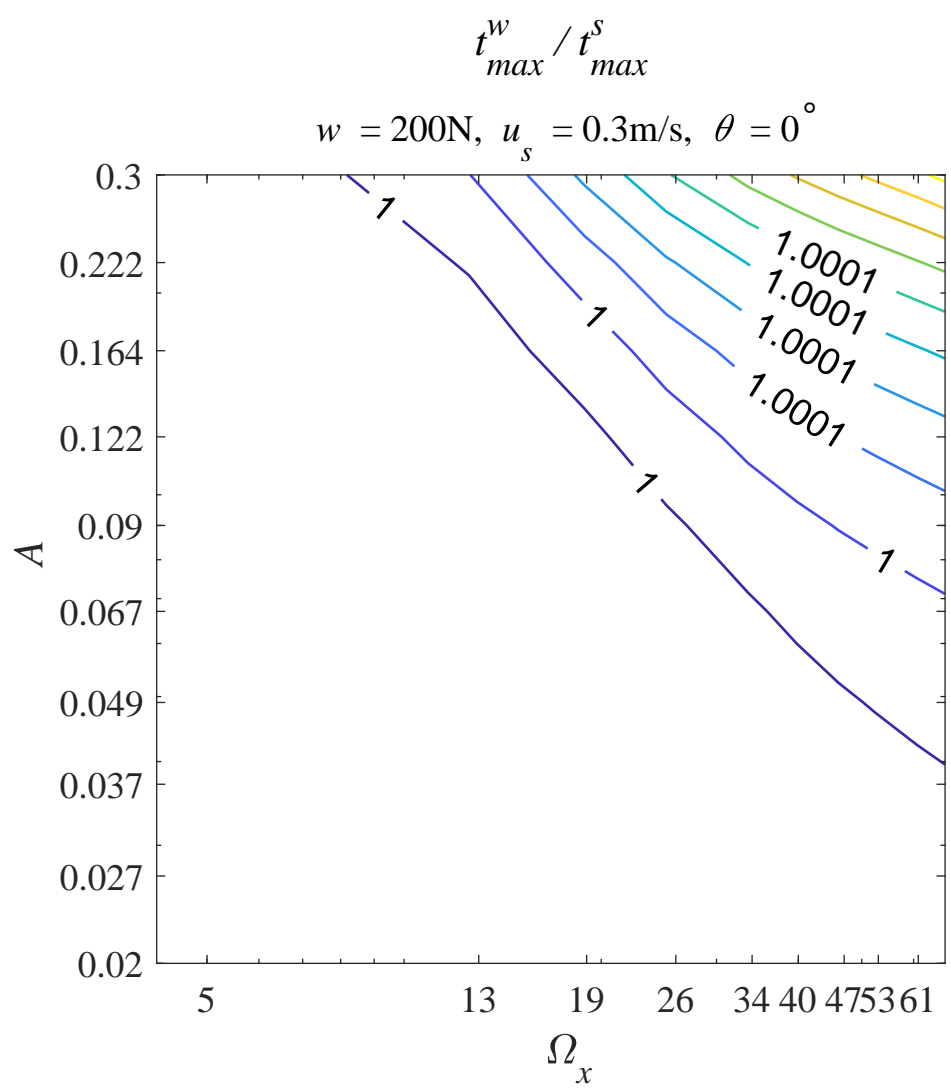

Supplement: s1 [file s1]

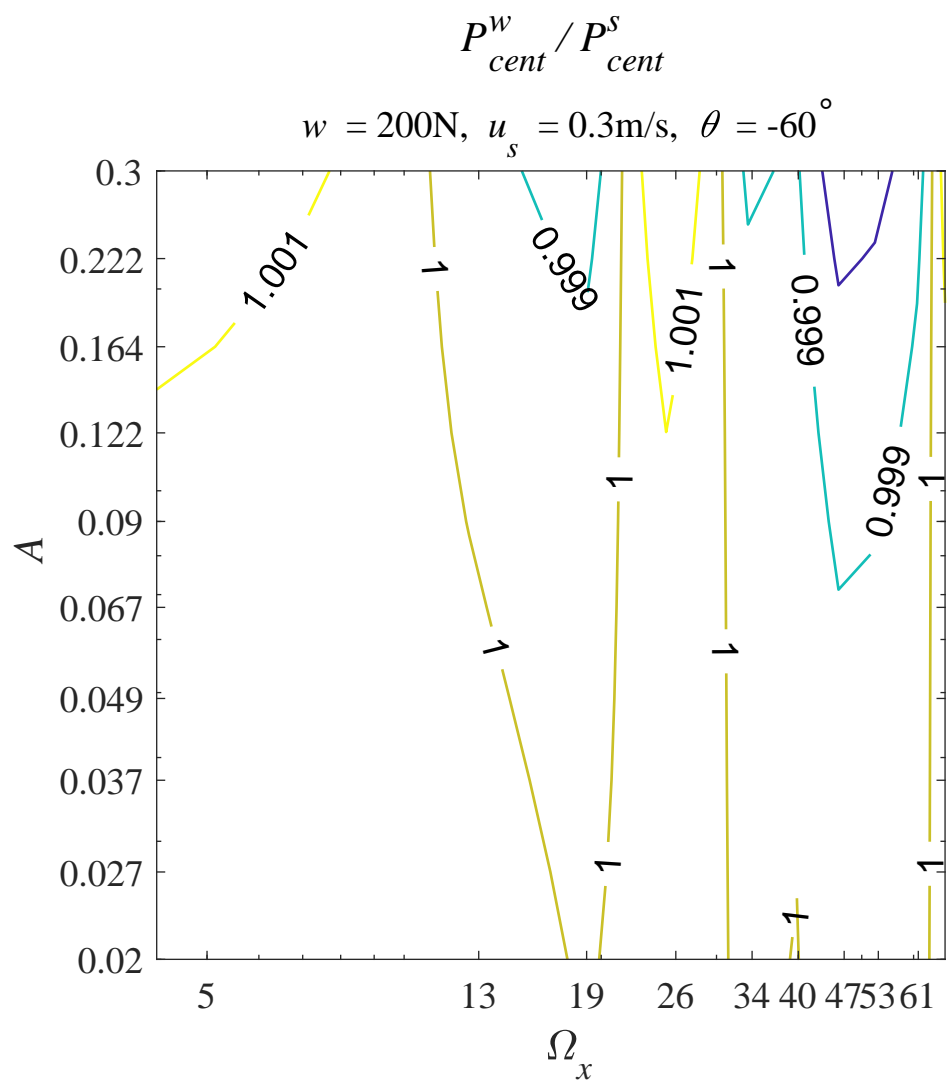

Supplement: s1 [file s1]

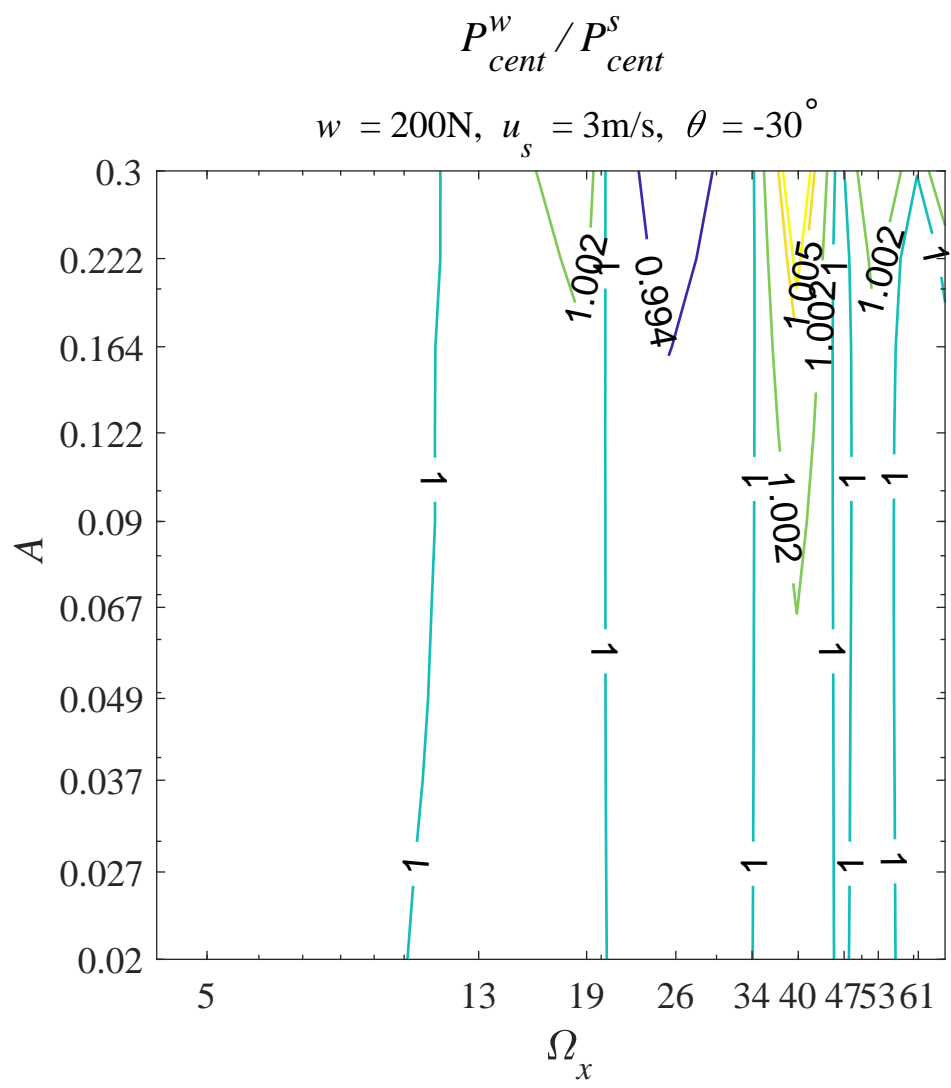

Supplement: s1 [file s1]

$$P_{max}^w / P_{max}^s$$

$$w = 200\text{N}, u_s = 0.3\text{m/s}, \theta = -30^\circ$$

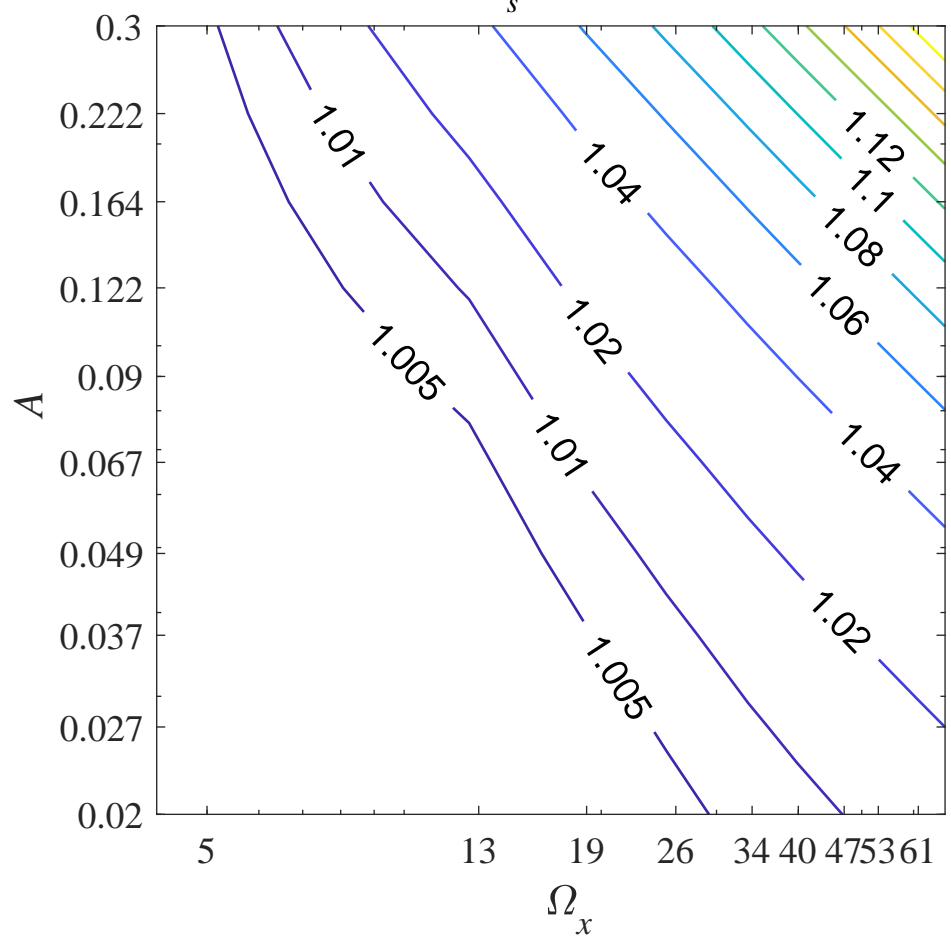

Supplement: s1 [file s1]

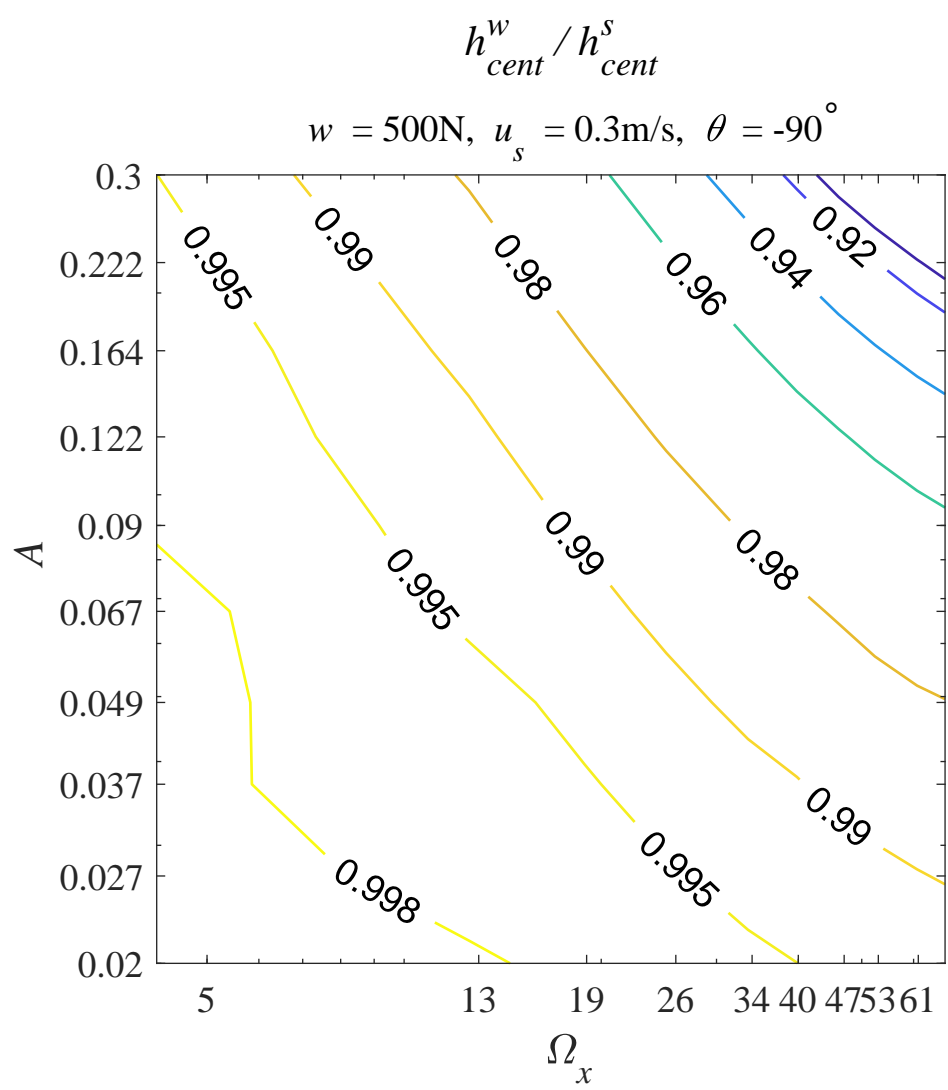

Supplement: s1 [file s1]

$$h_{min}^w / h_{min}^s$$

$$w = 500\text{N}, u_s = 0.3\text{m/s}, \theta = -30^\circ$$

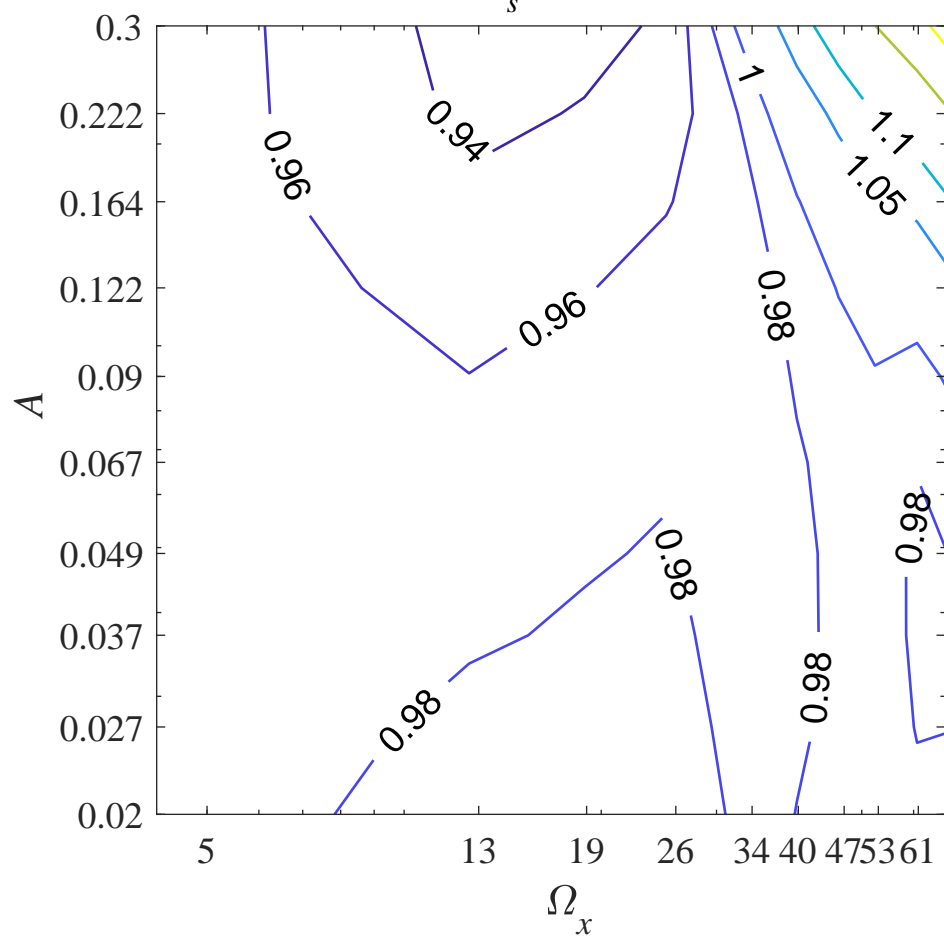

Supplement: s1 [file s1]

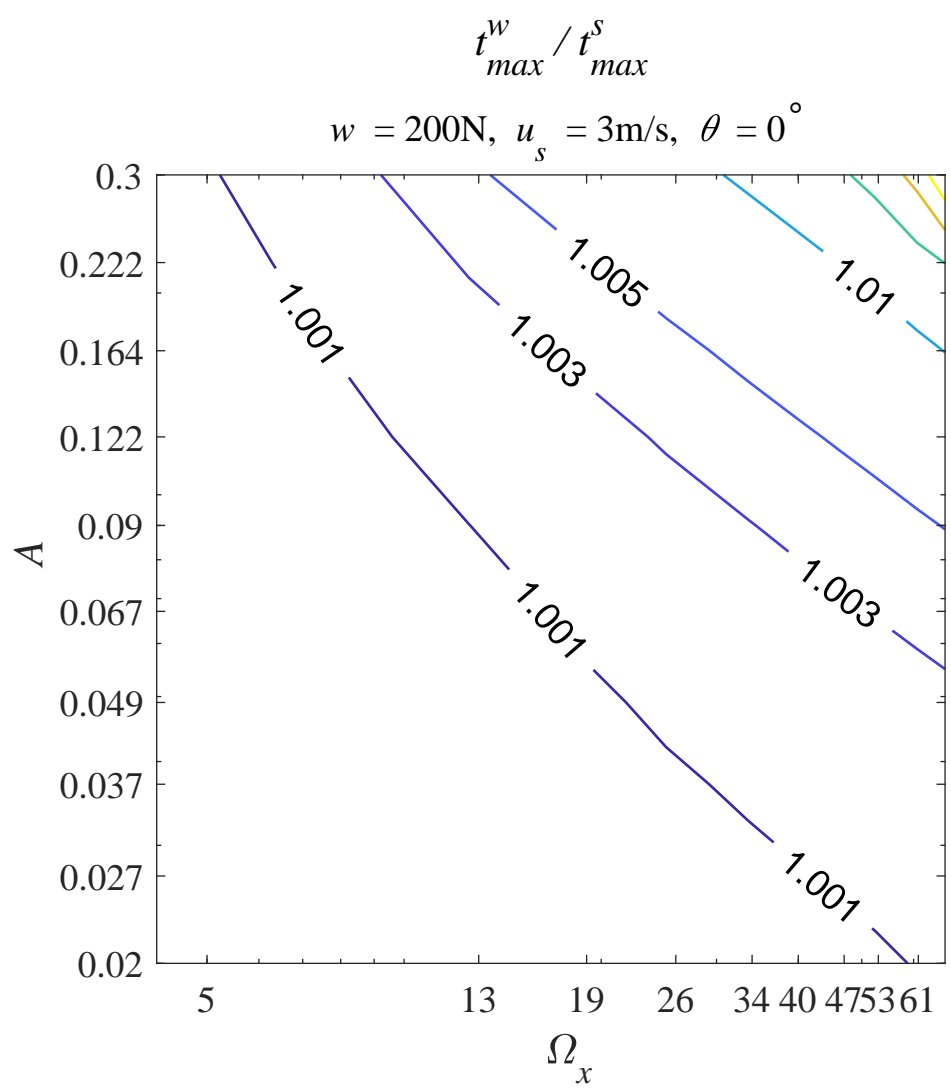

Supplement: s1 [file s1]

$$h_{min}^w / h_{min}^s$$

$$w = 500\text{N}, u_s = 3\text{m/s}, \theta = -30^\circ$$

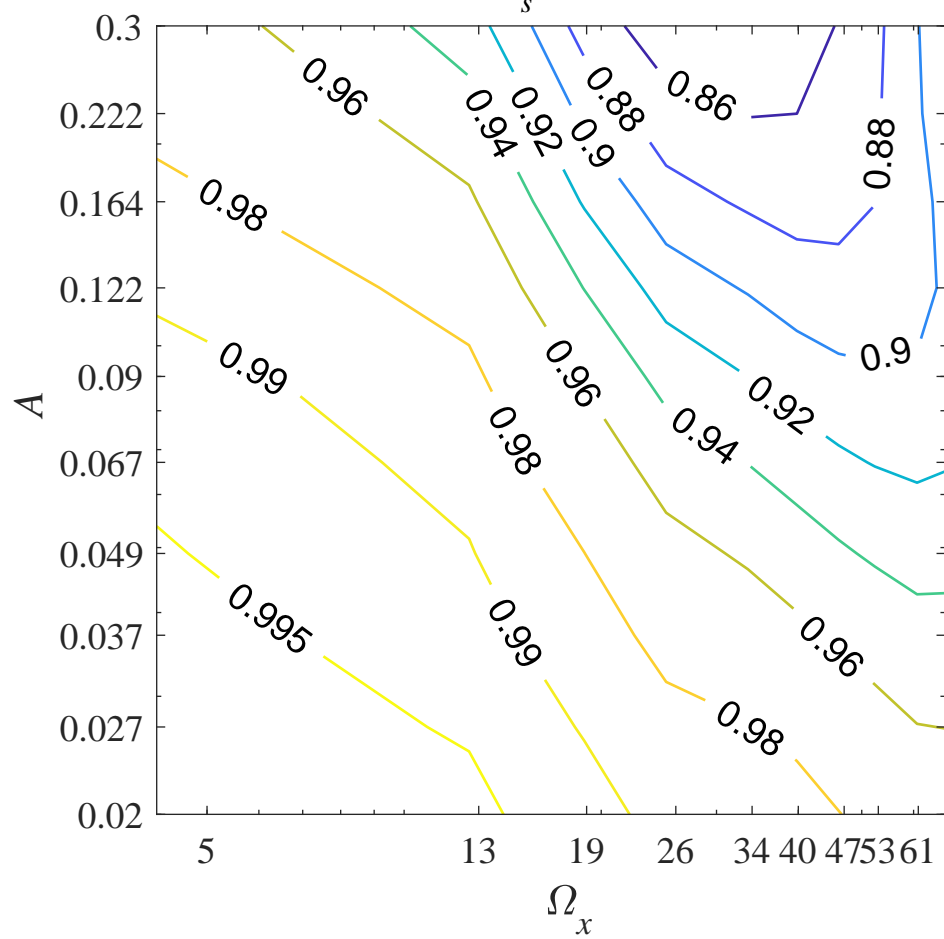

Supplement: s1 [file s1]

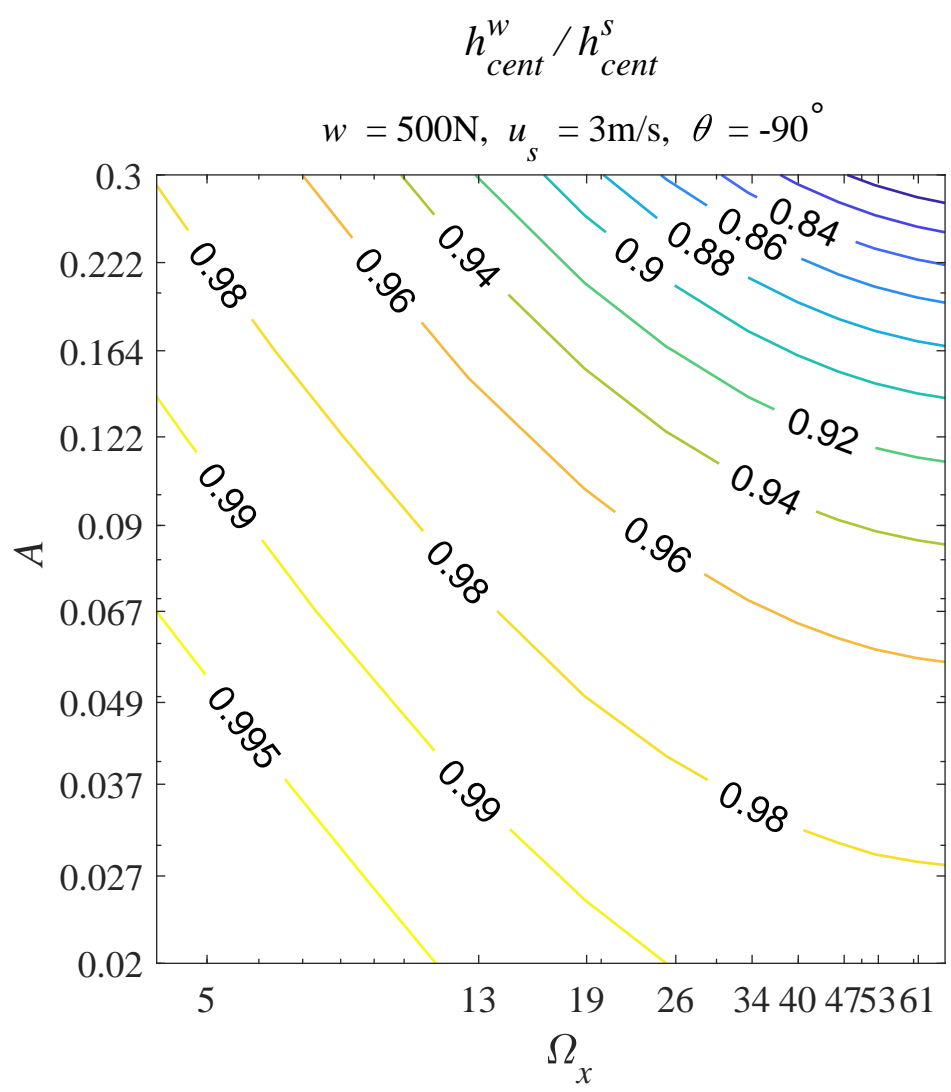

Supplement: s1 [file s1]

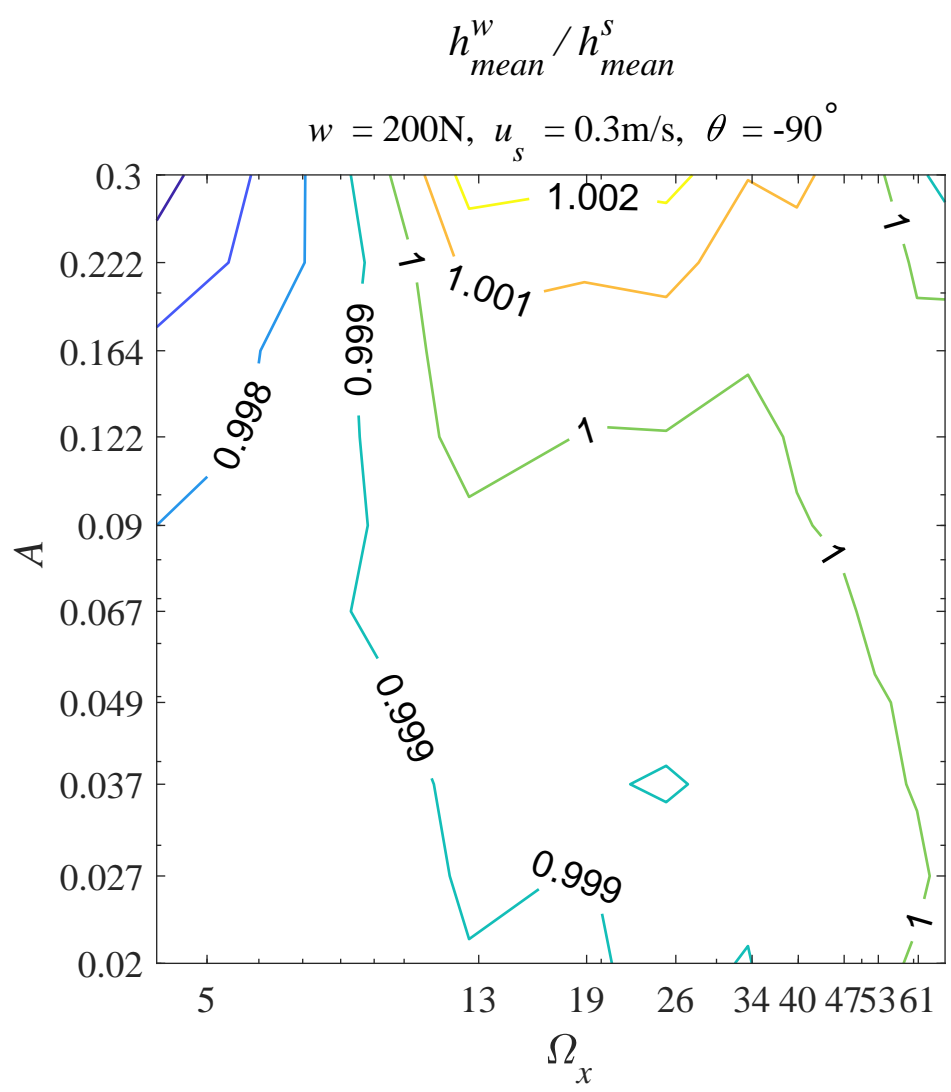

Supplement: s1 [file s1]

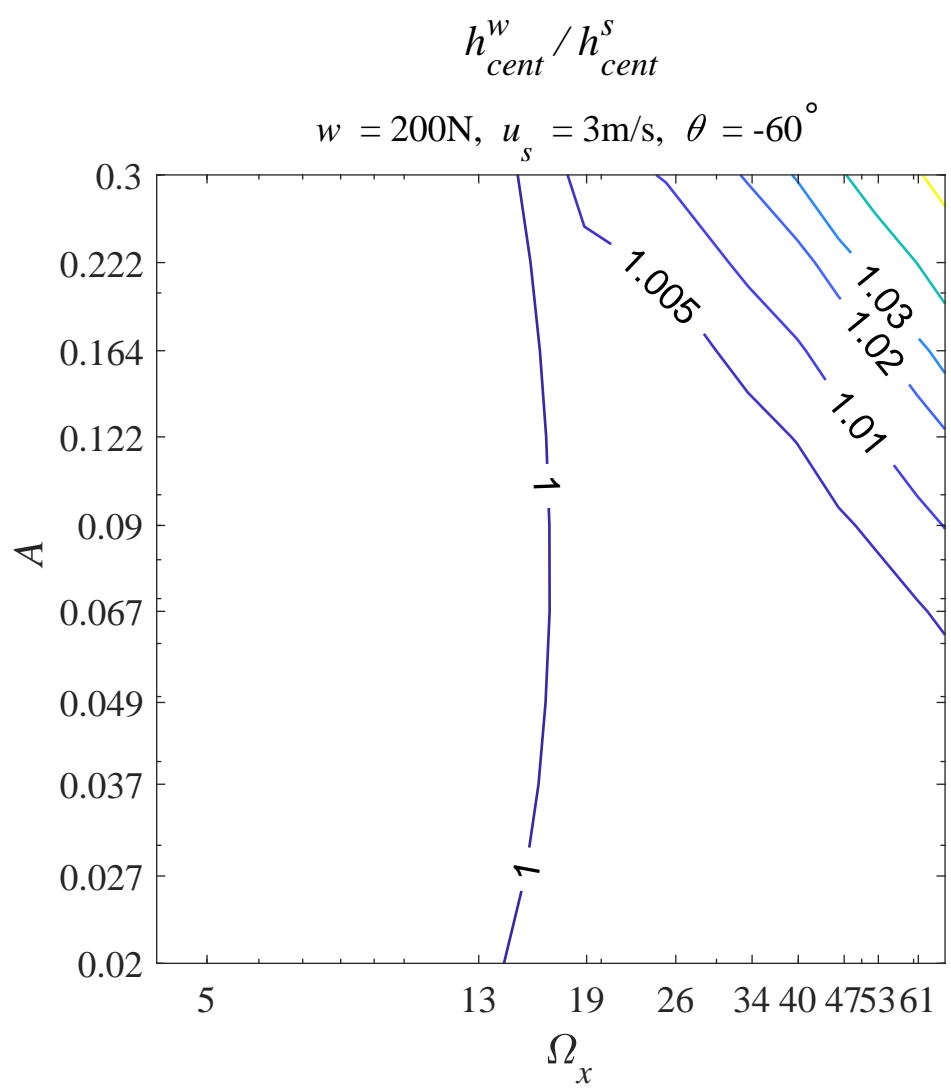

Supplement: s1 [file s1]

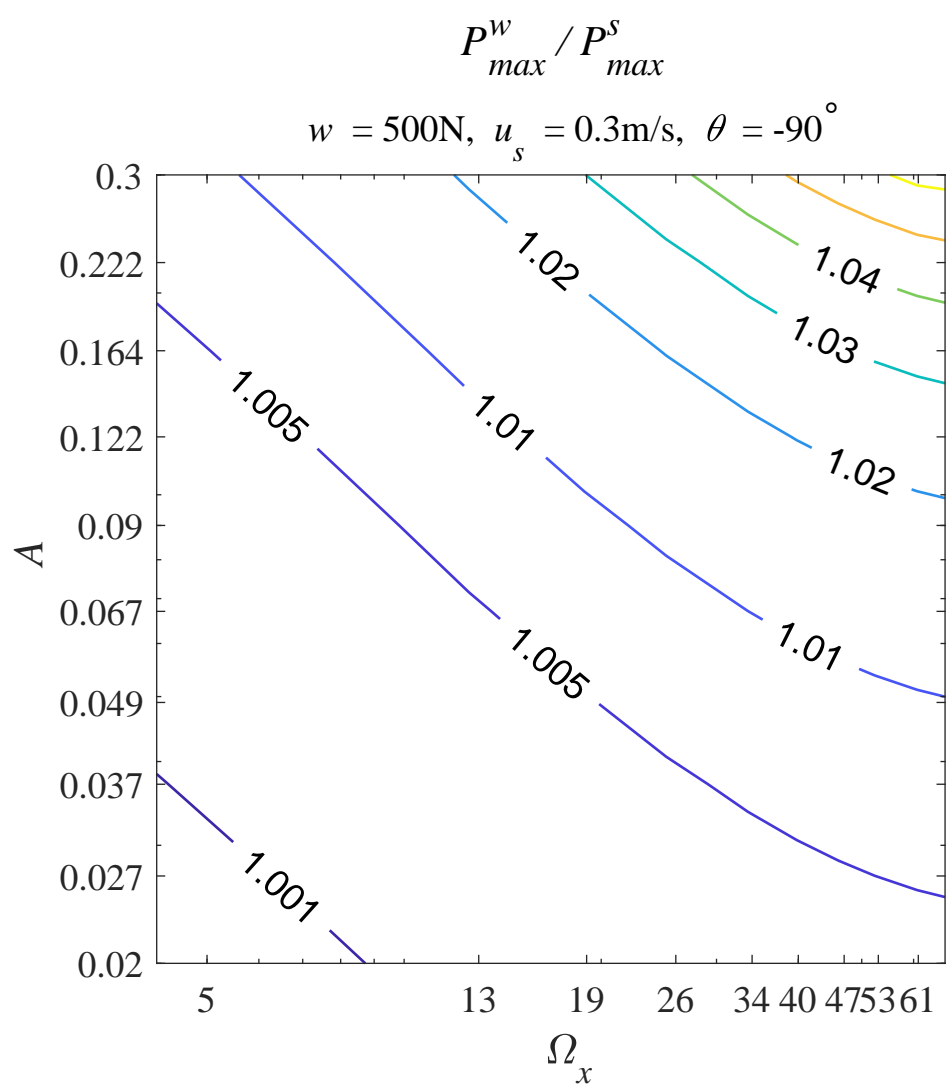

Supplement: s1 [file s1]

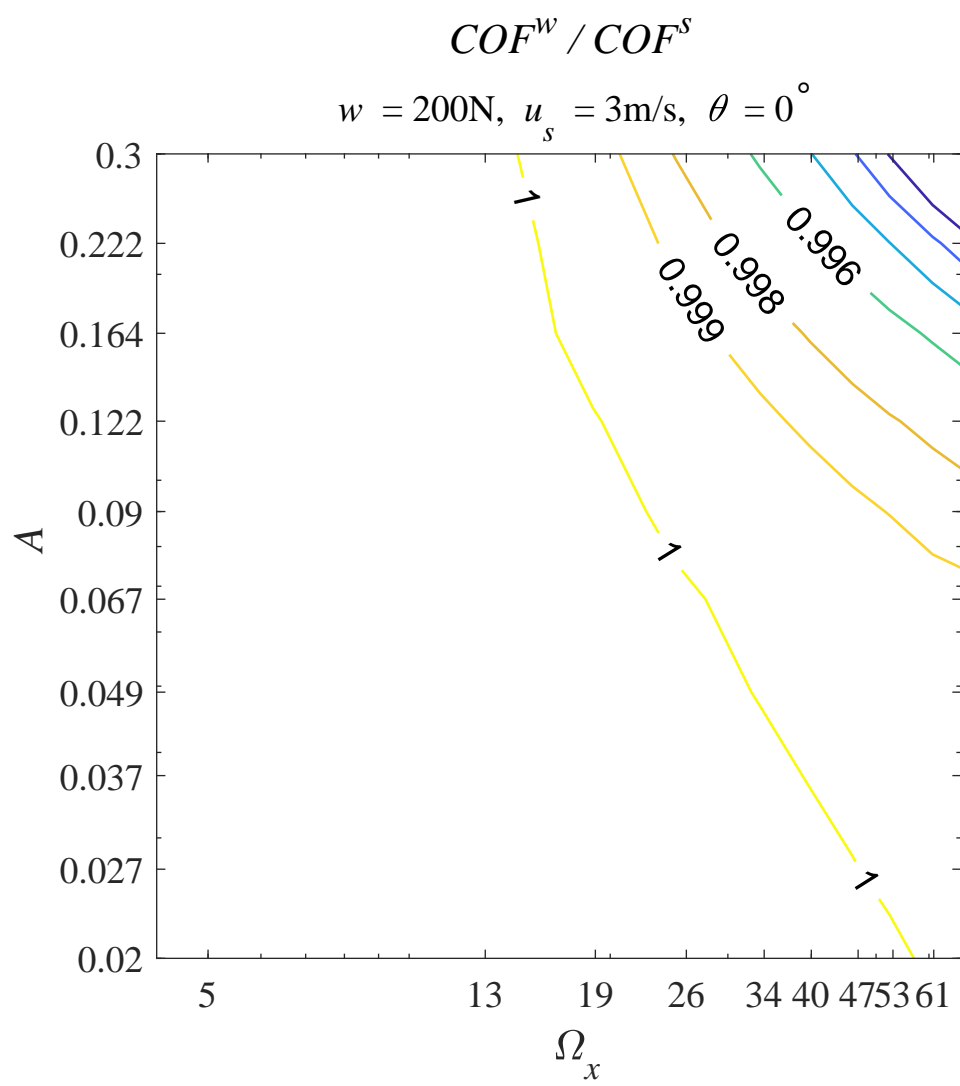

Supplement: s1 [file s1]

$$h_{mean}^w / h_{mean}^s$$

$$w = 500\text{N}, u_s = 0.3\text{m/s}, \theta = 0^\circ$$

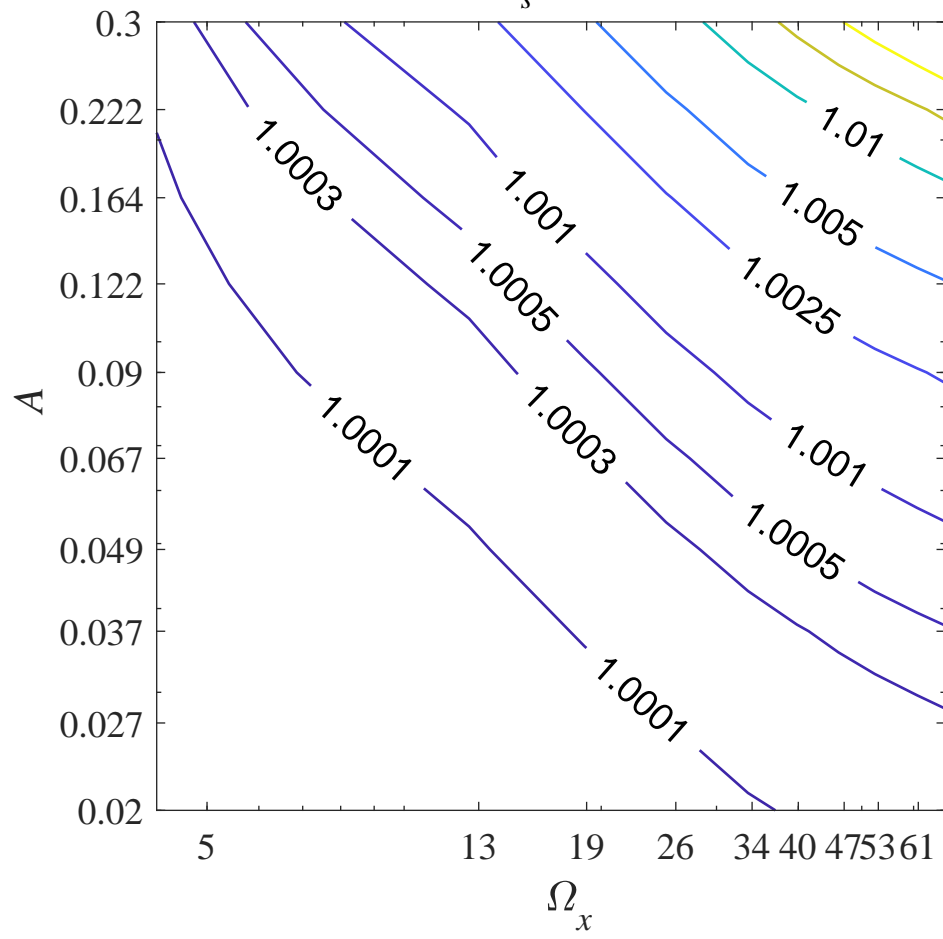

Supplement: s1 [file s1]

$$P_{max}^w / P_{max}^s$$

$$w = 500\text{N}, u_s = 3\text{m/s}, \theta = 0^\circ$$

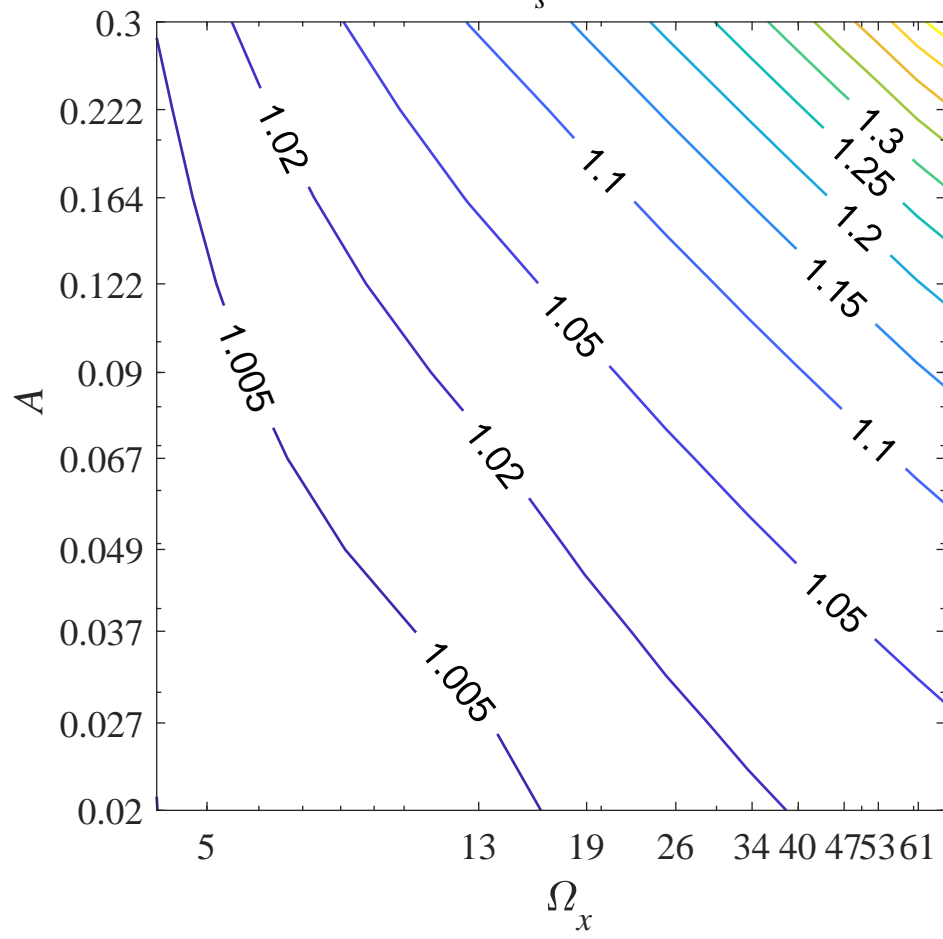

Supplement: s1 [file s1]

$$w = 200\text{N}, u_s = 3\text{m/s}, \theta = 0^\circ$$

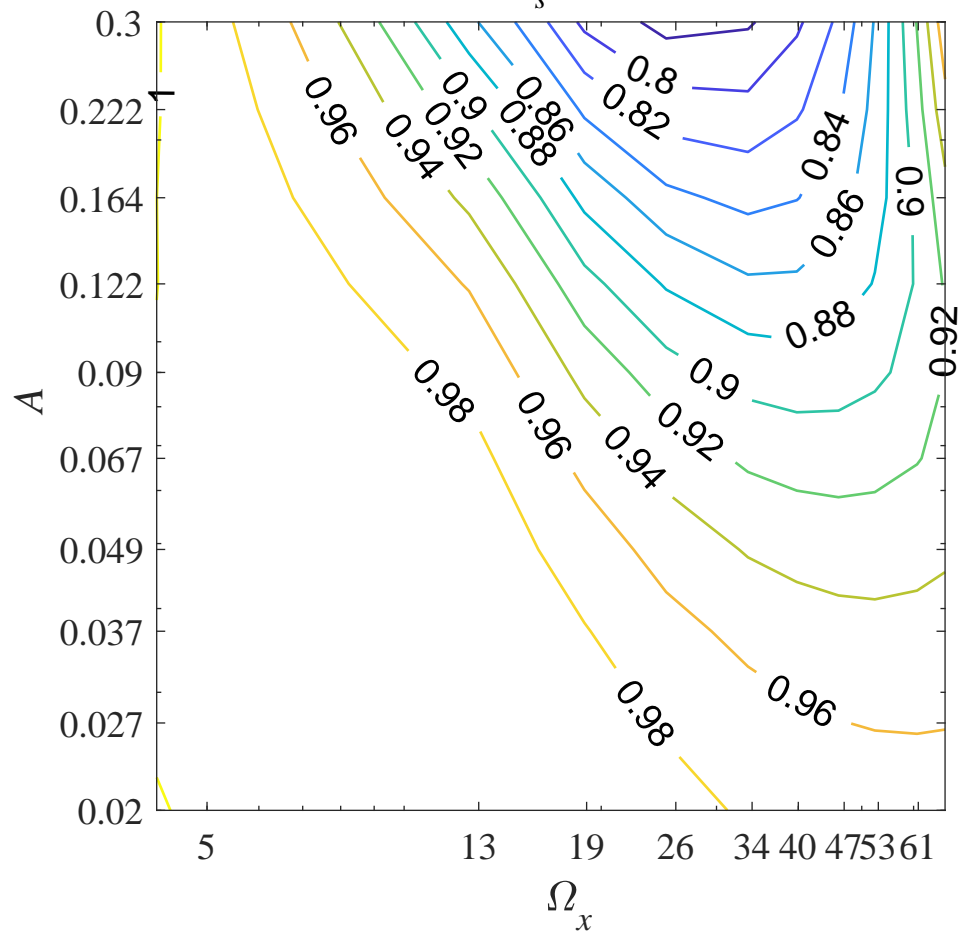

Supplement: s1 [file s1]

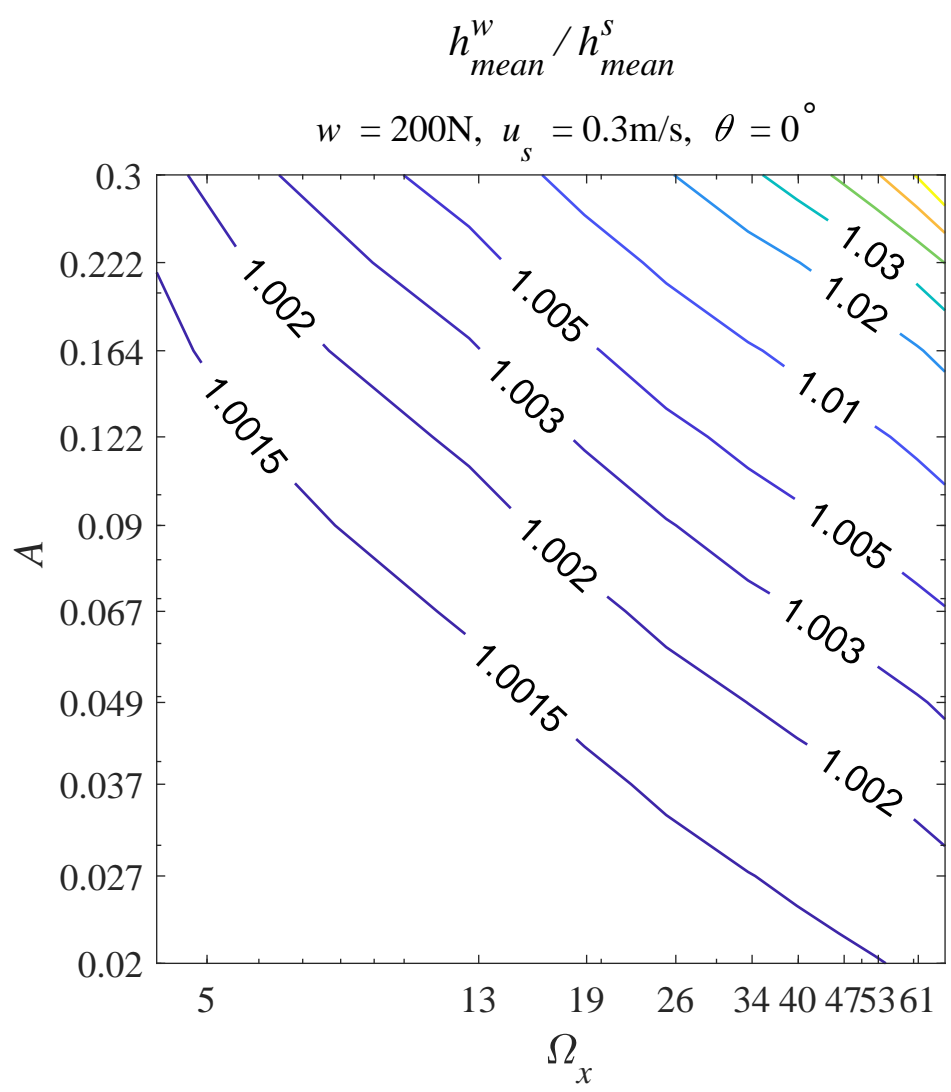

Supplement: s1 [file s1]

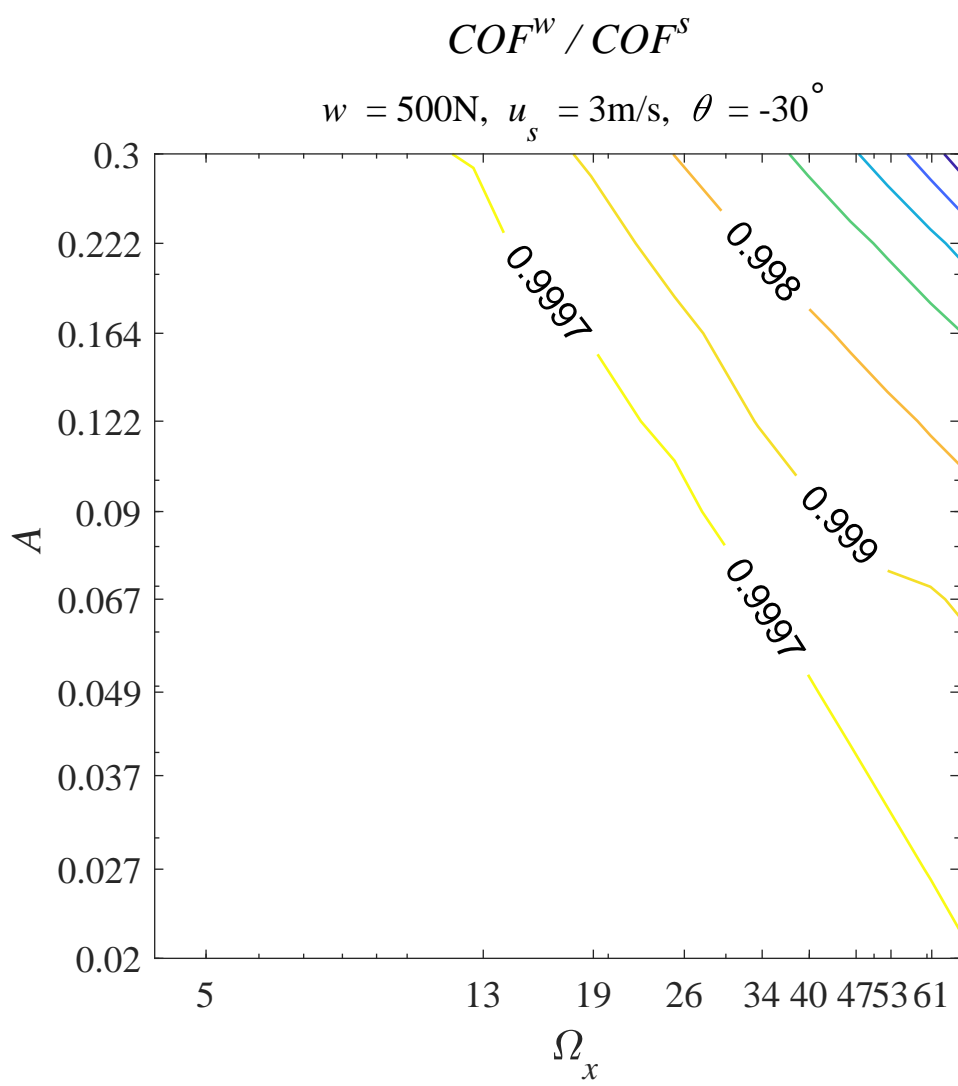

Supplement: s1 [file s1]

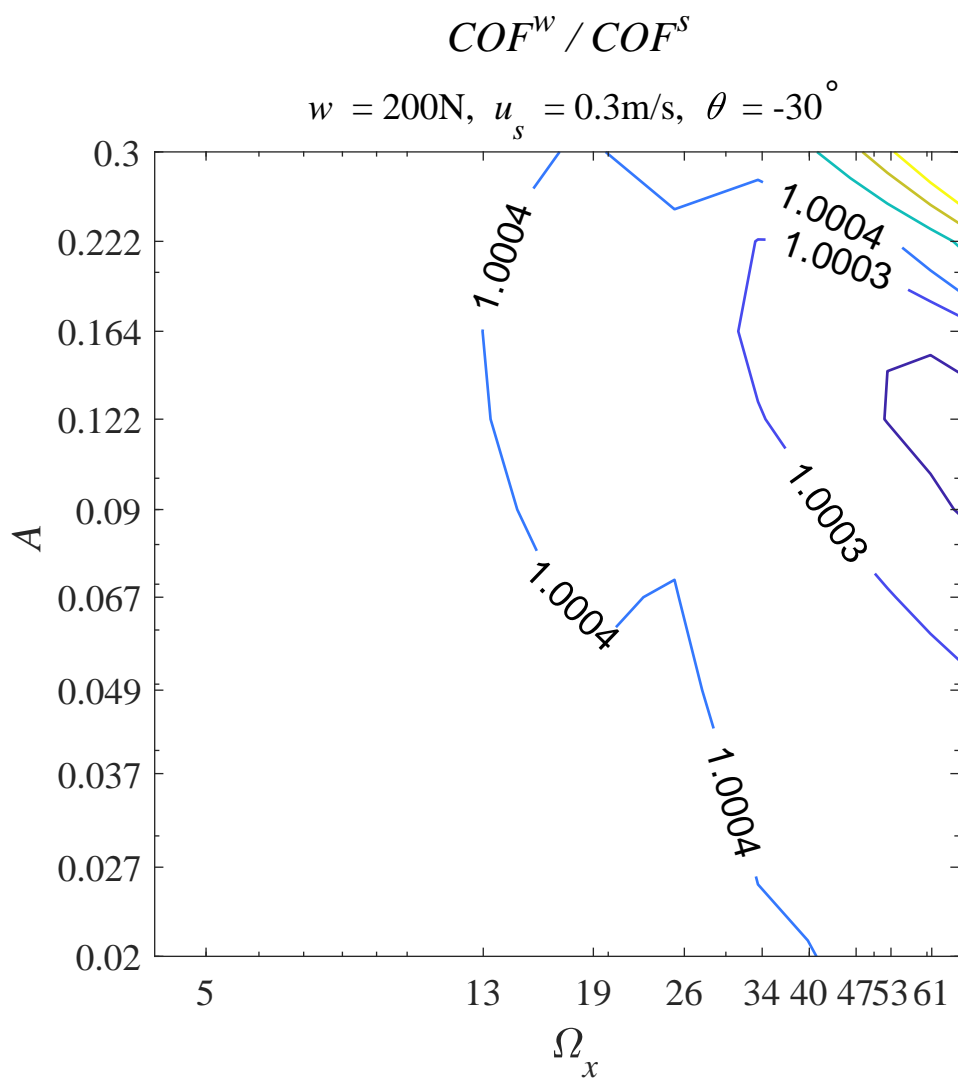

Supplement: s1 [file s1]

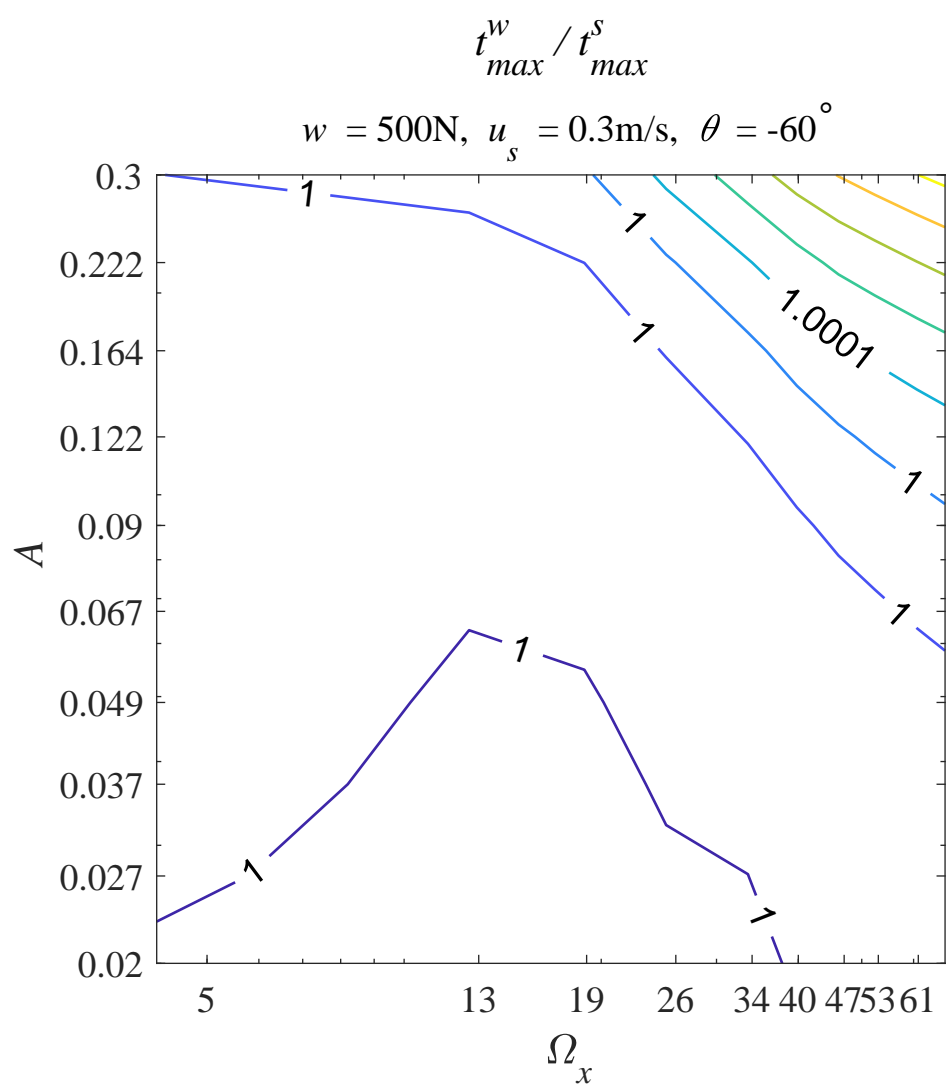

Supplement: s1 [file s1]

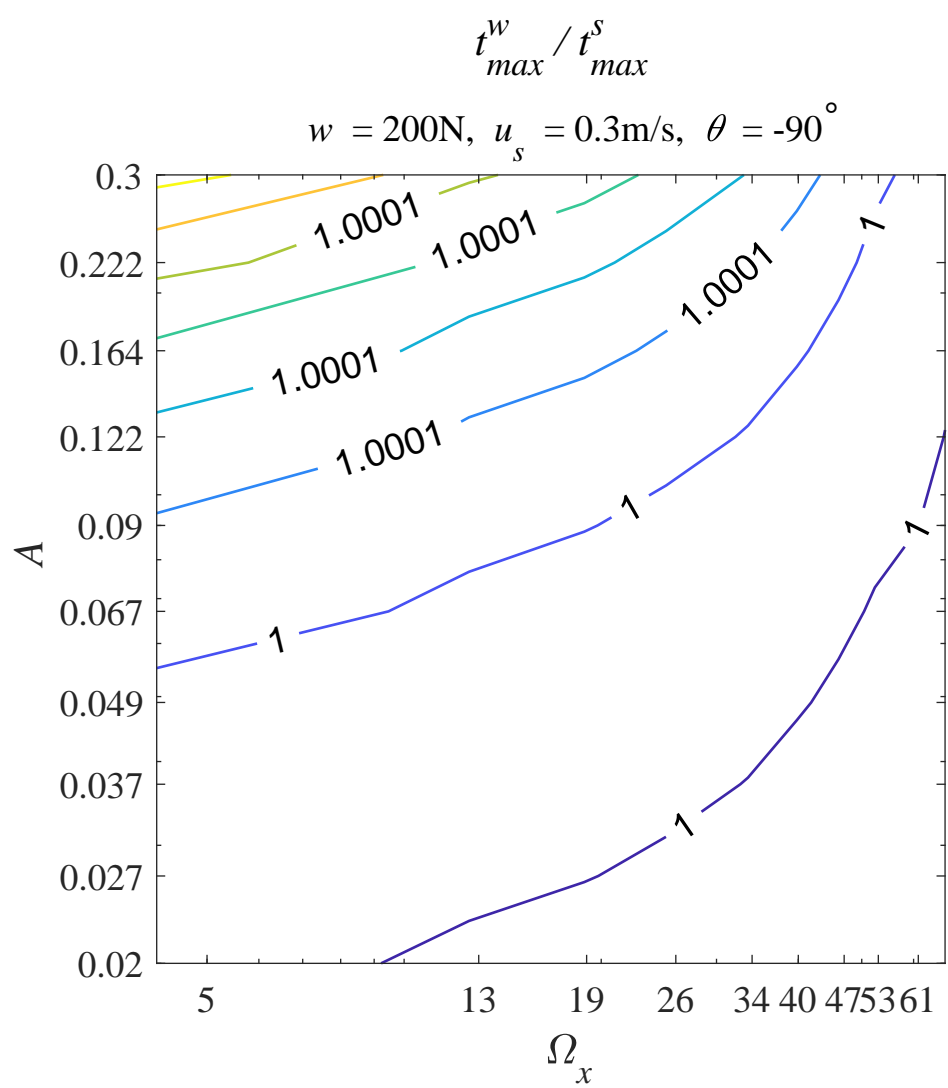

Supplement: s1 [file s1]

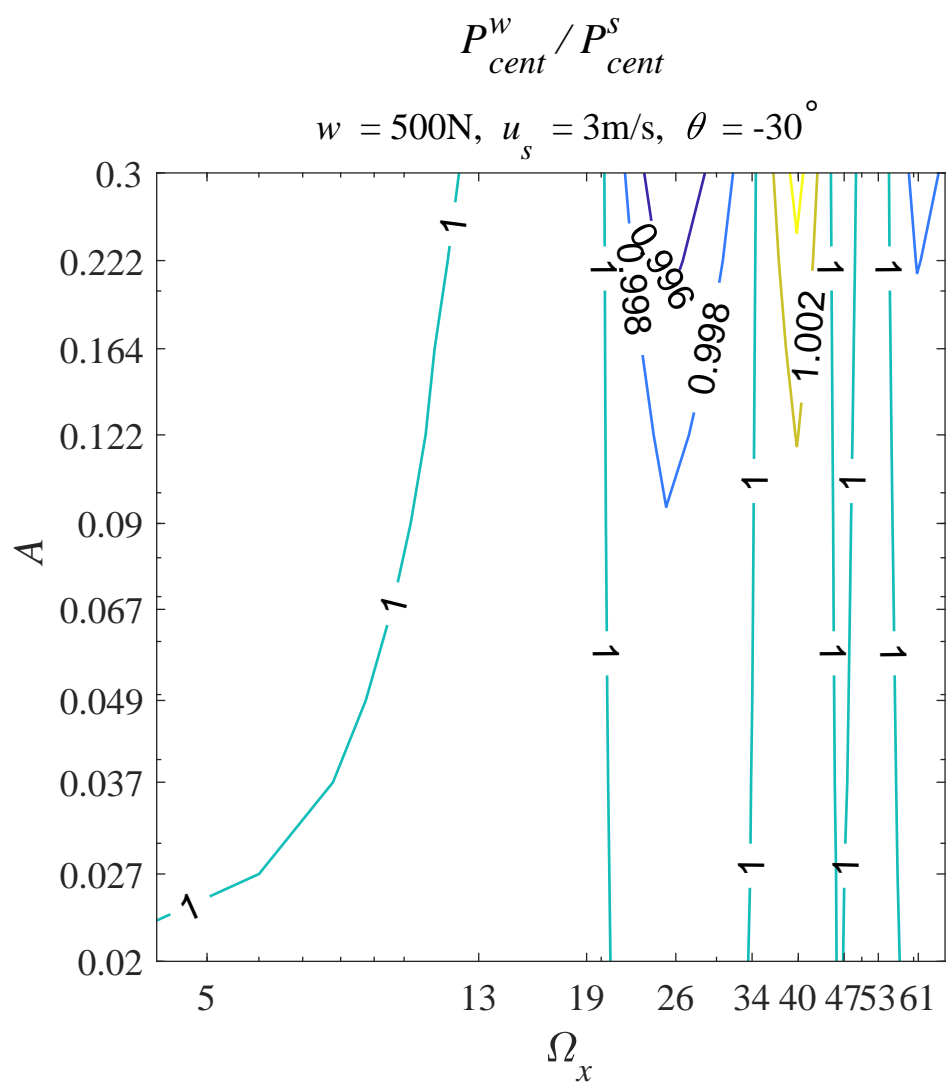

Supplement: s1 [file s1]

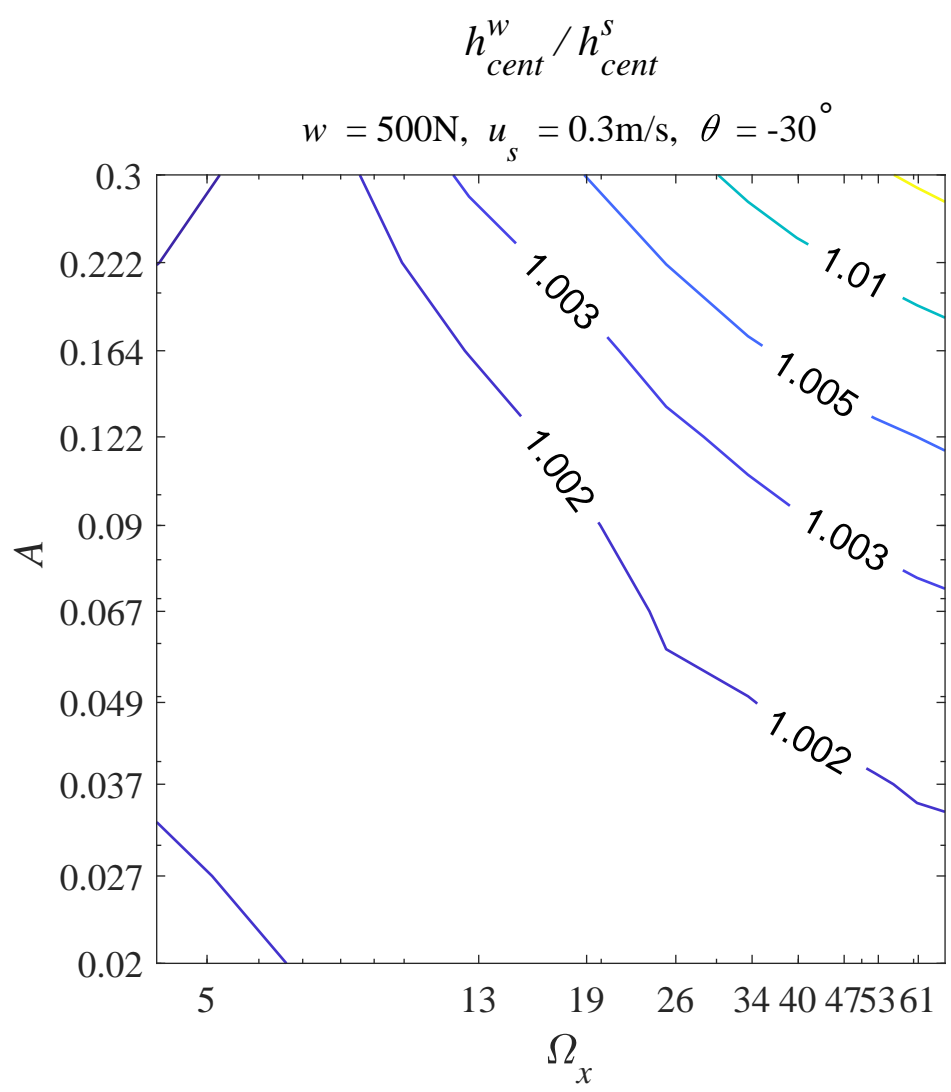

Supplement: s1 [file s1]

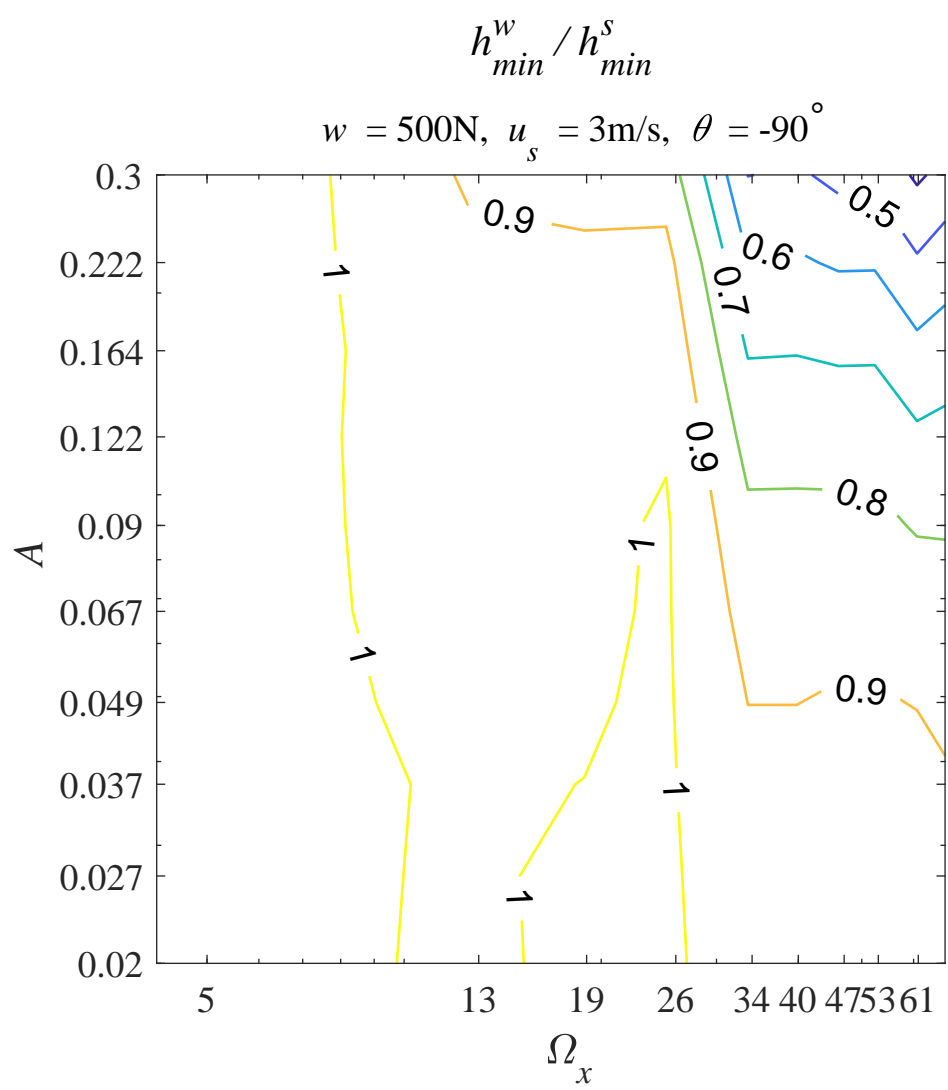

Supplement: s1 [file s1]

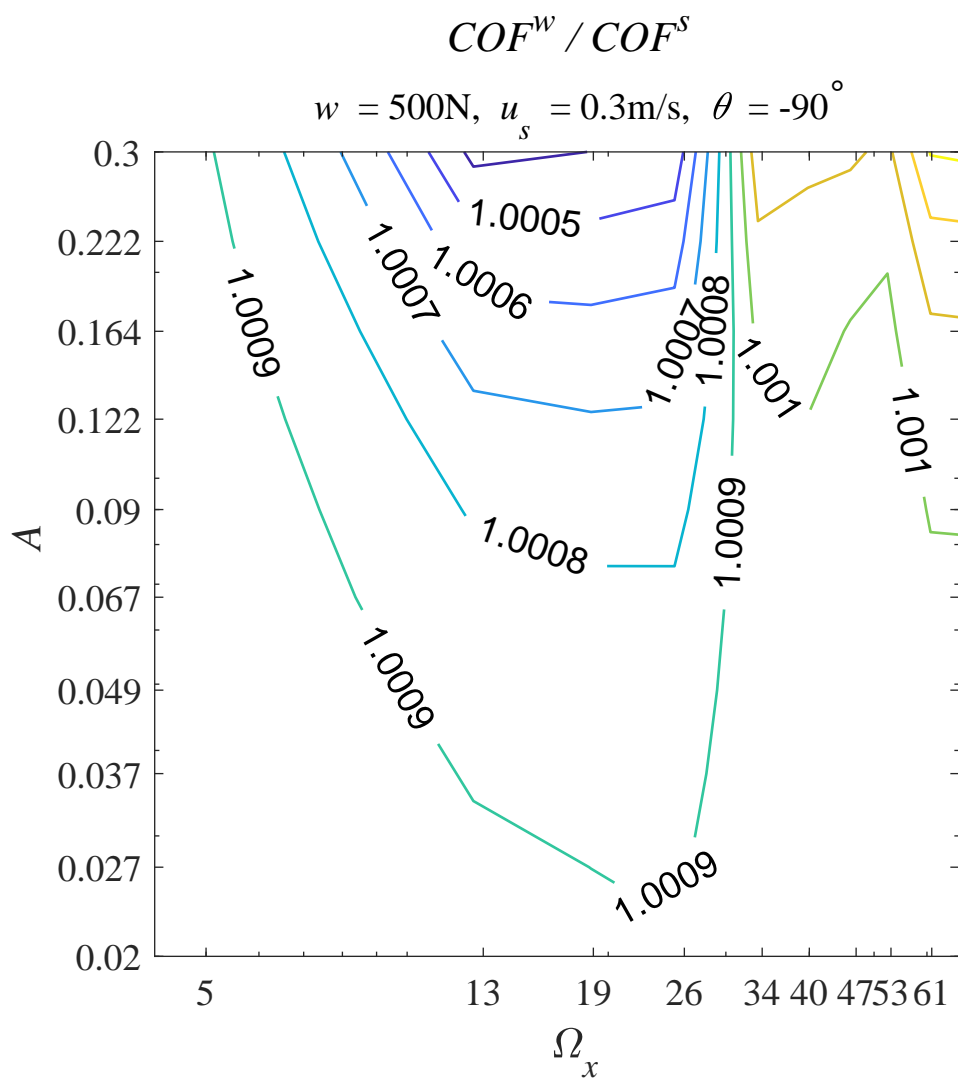

Supplement: s1 [file s1]

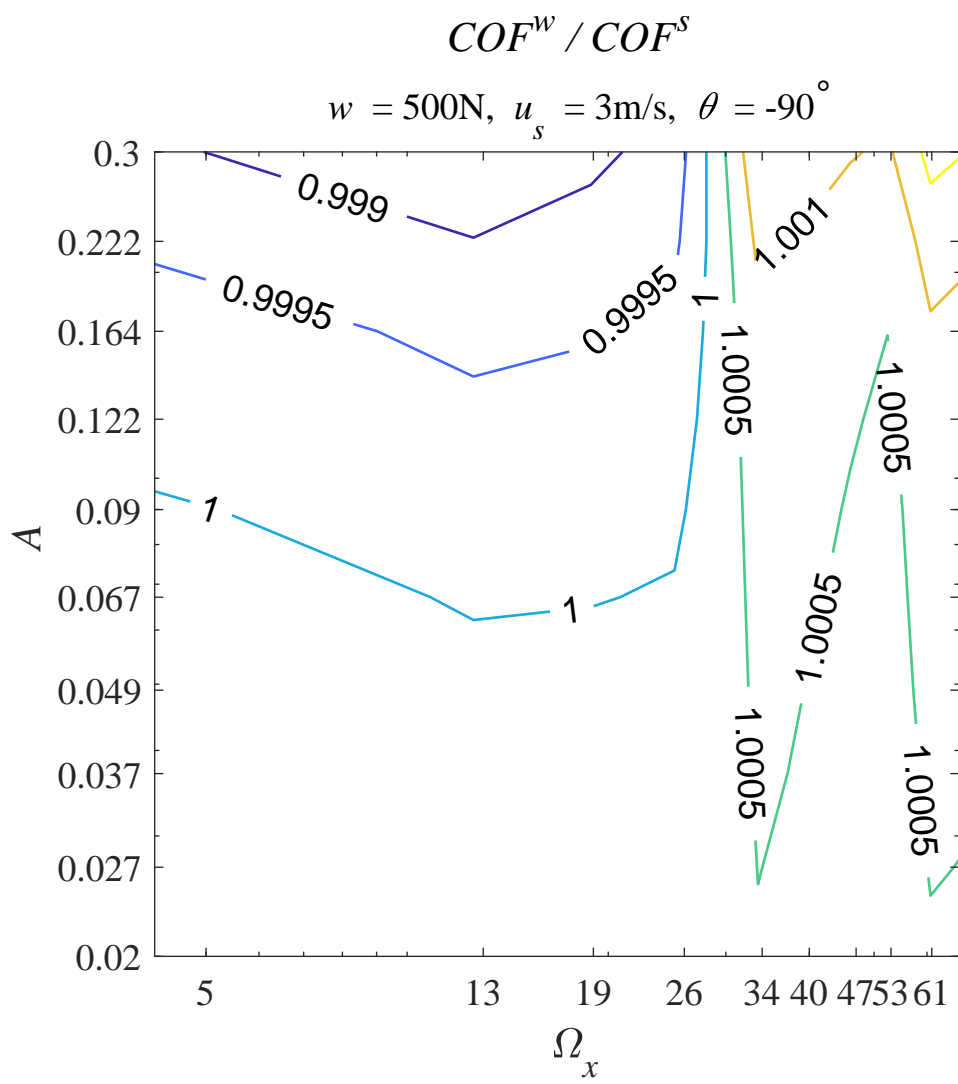

Supplement: s1 [file s1]

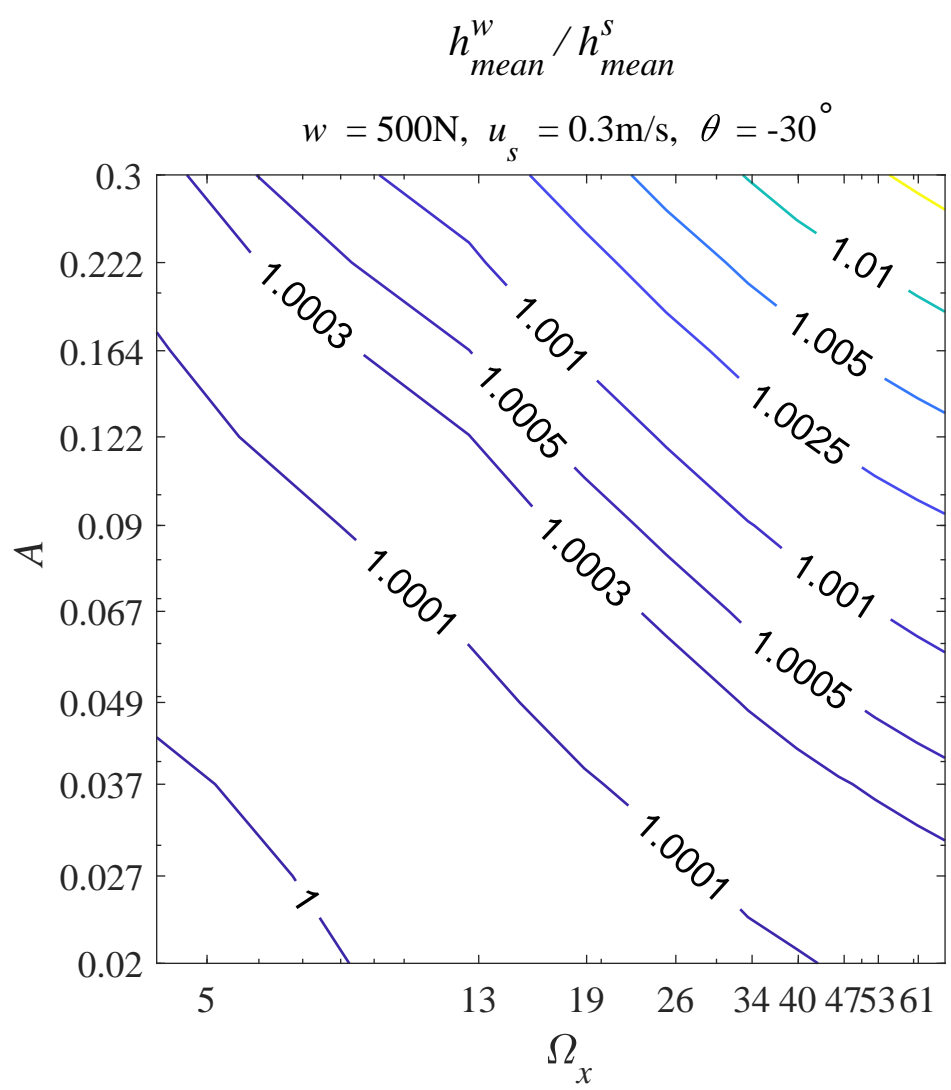

Supplement: s1 [file s1]

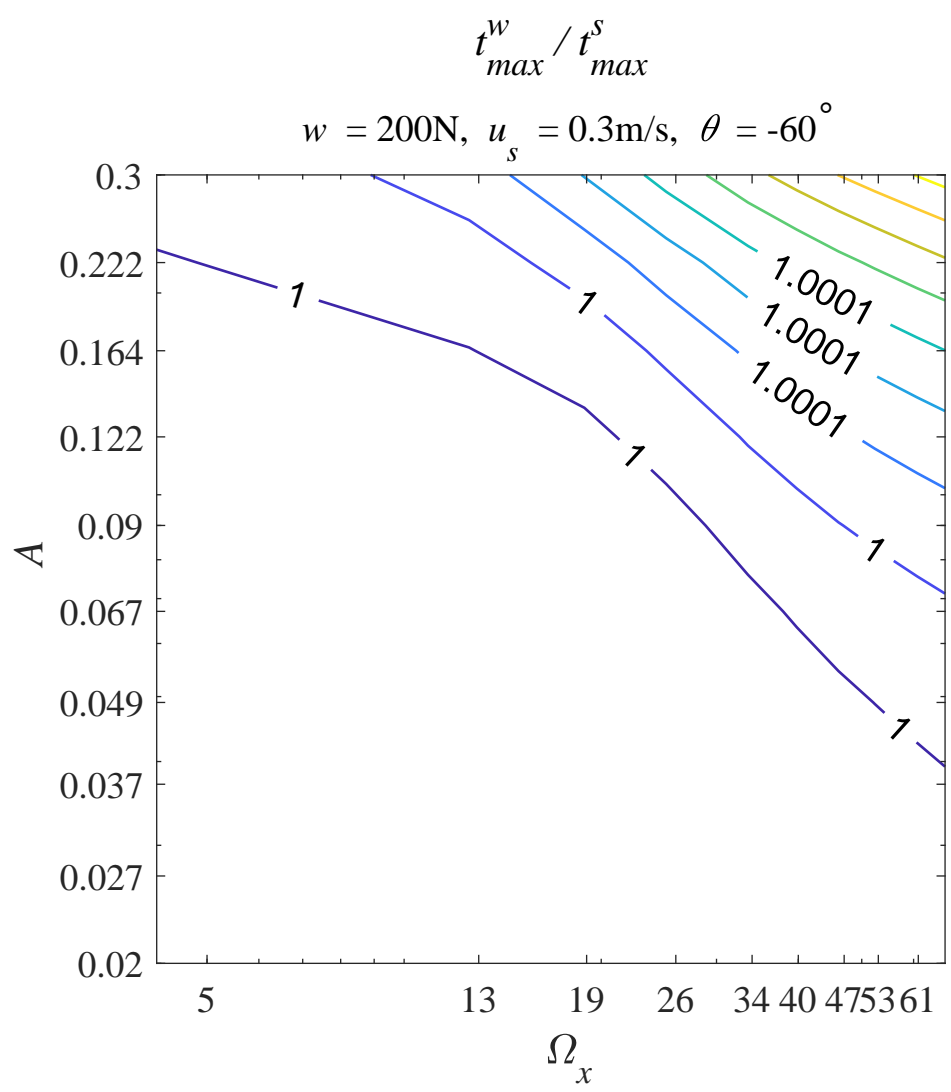

Supplement: s1 [file s1]

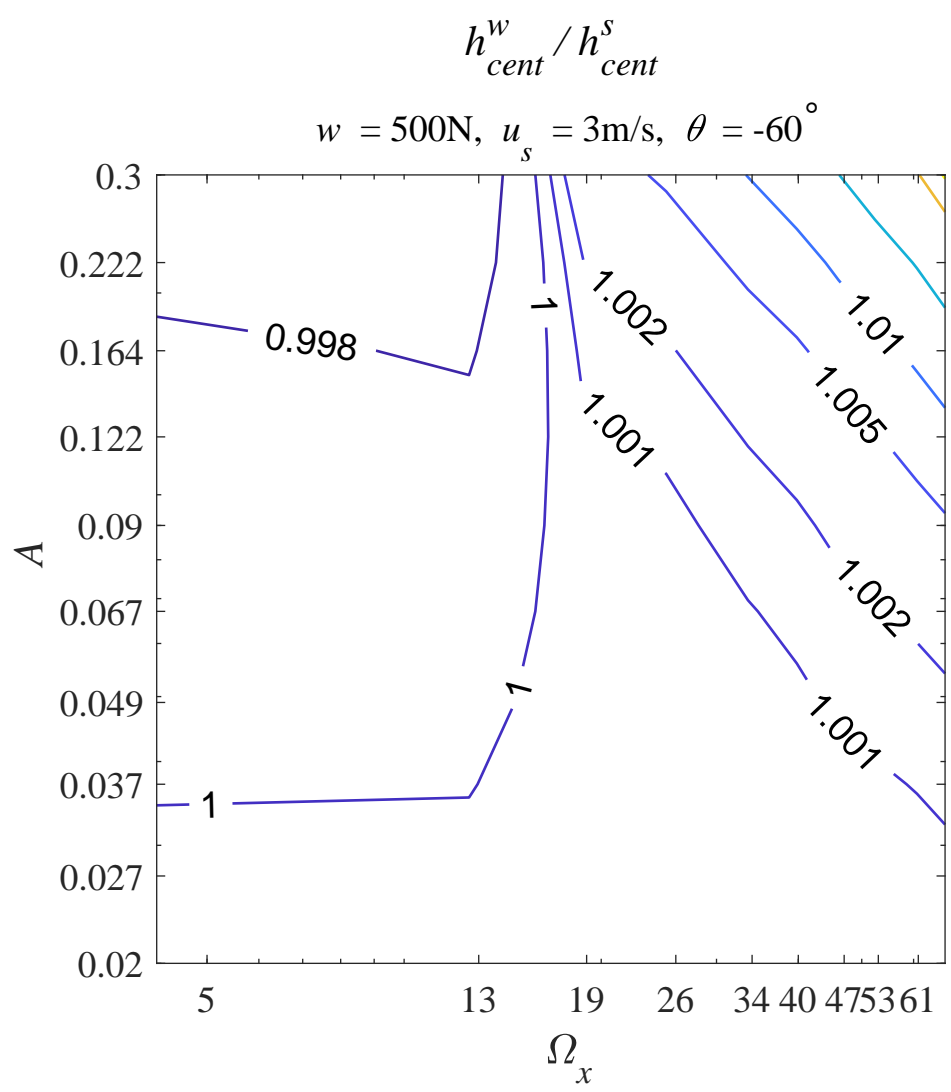

Supplement: s1 [file s1]

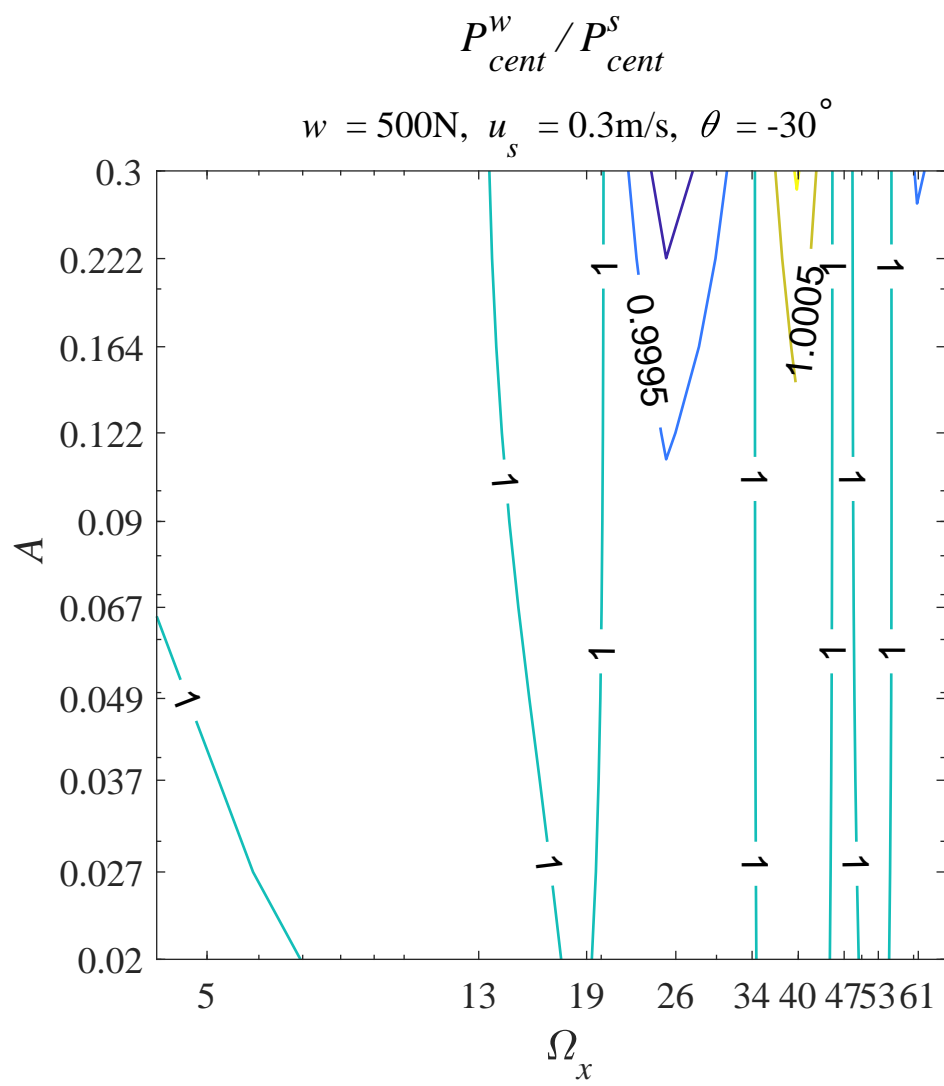

Supplement: s1 [file s1]

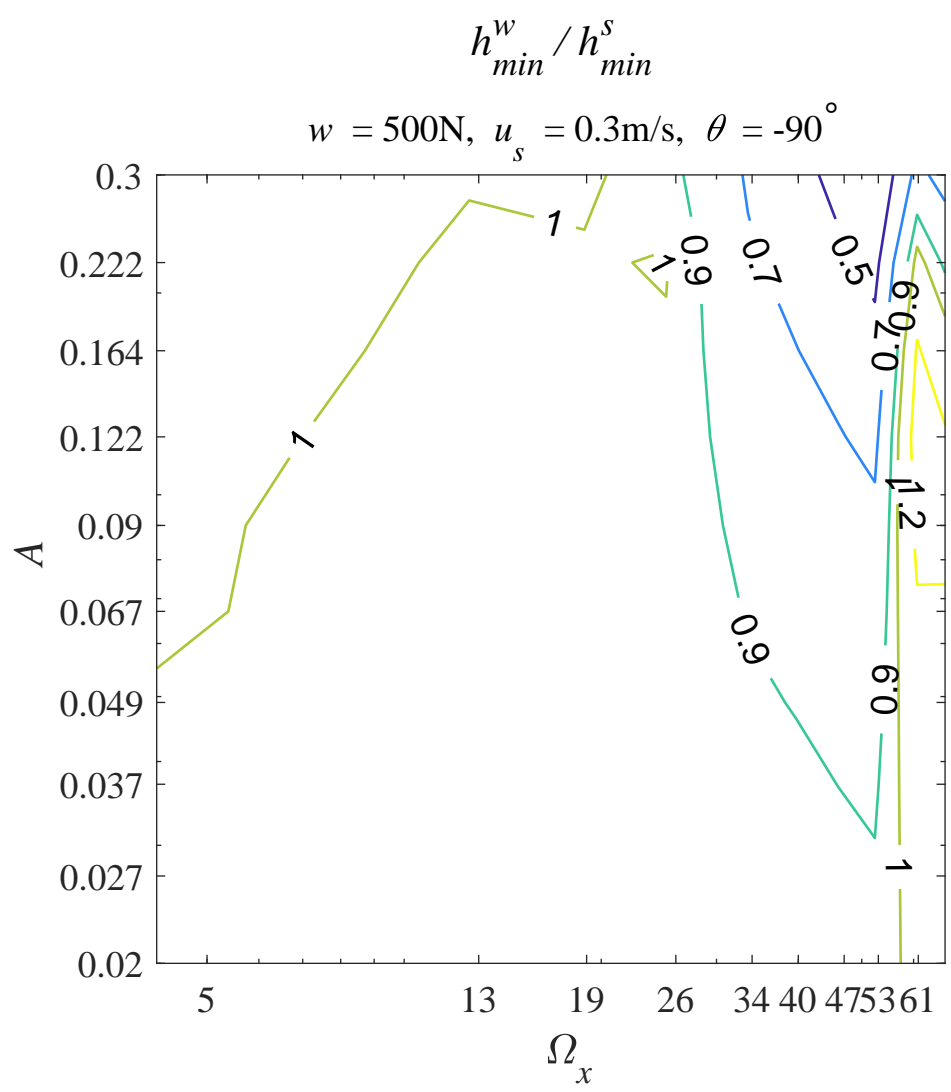

Supplement: s1 [file s1]

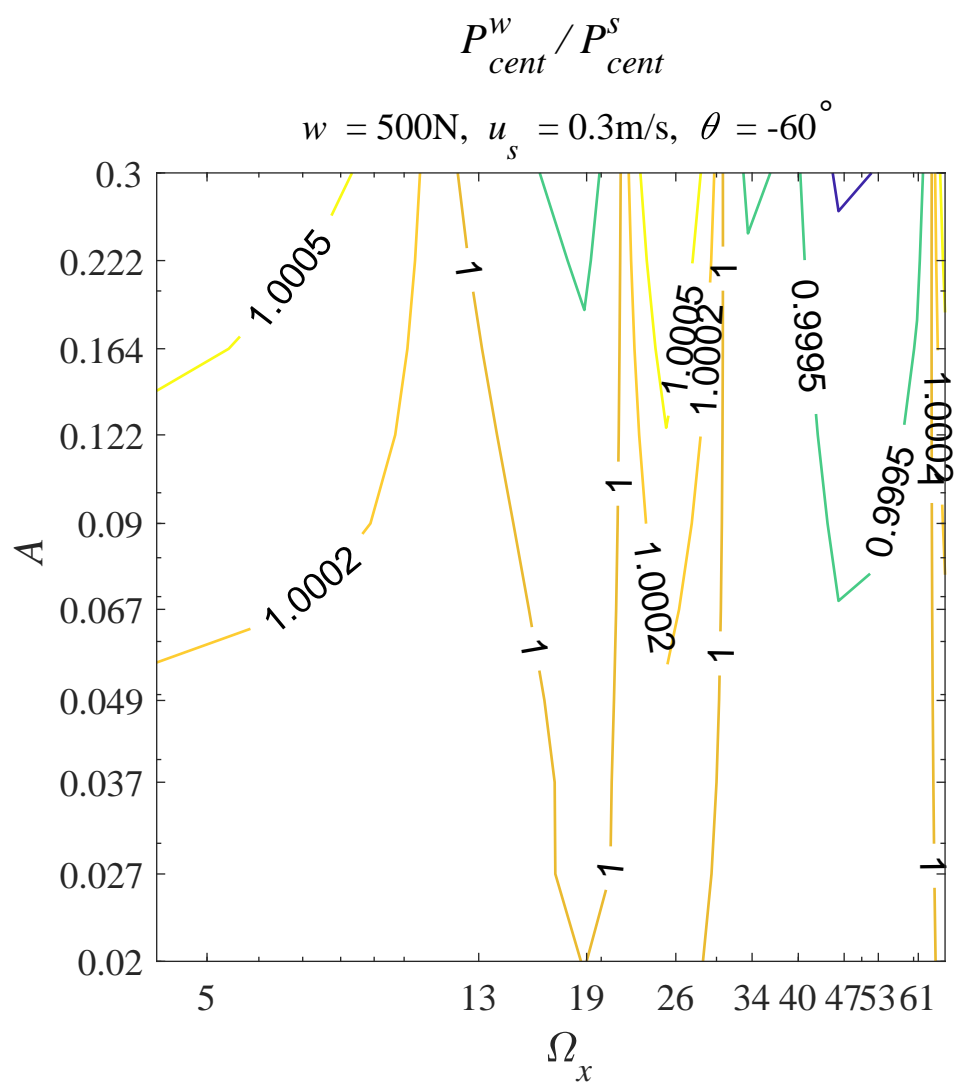

Supplement: s1 [file s1]

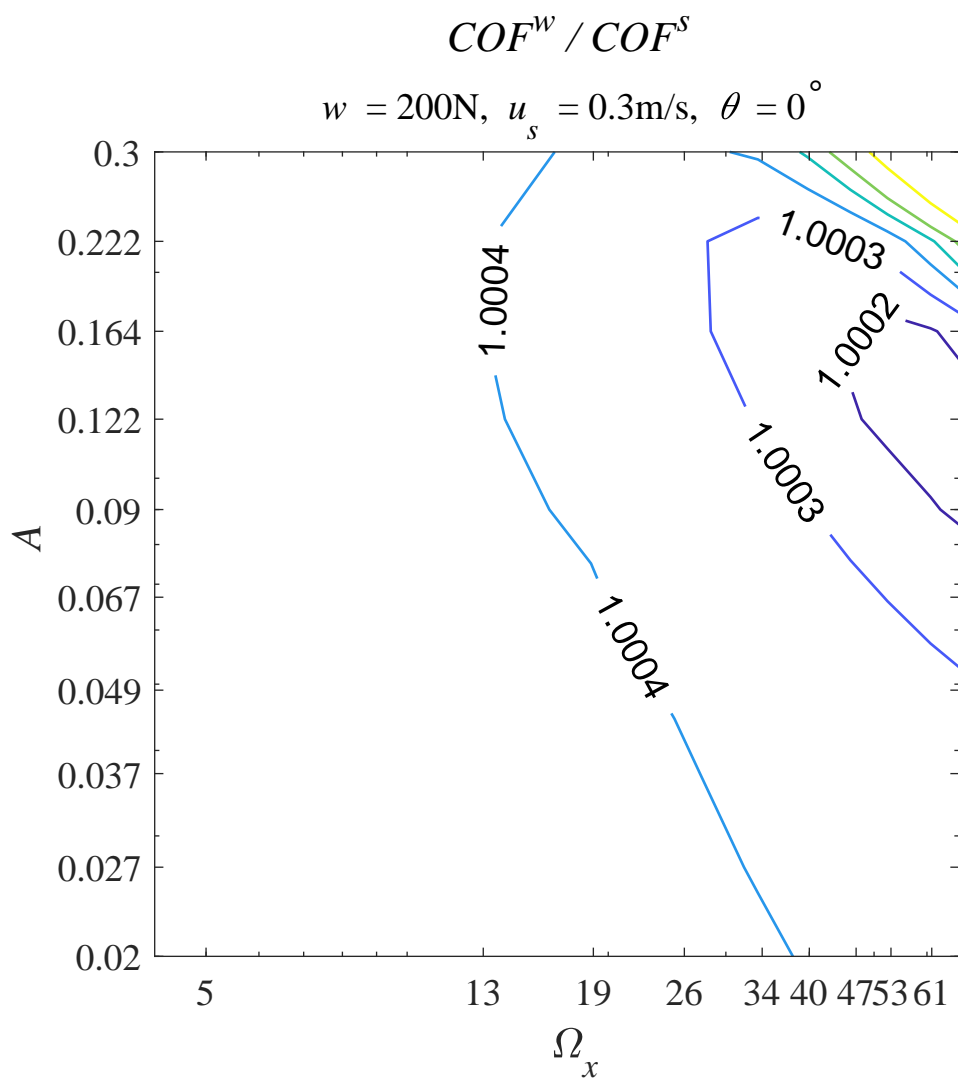

Supplement: s1 [file s1]

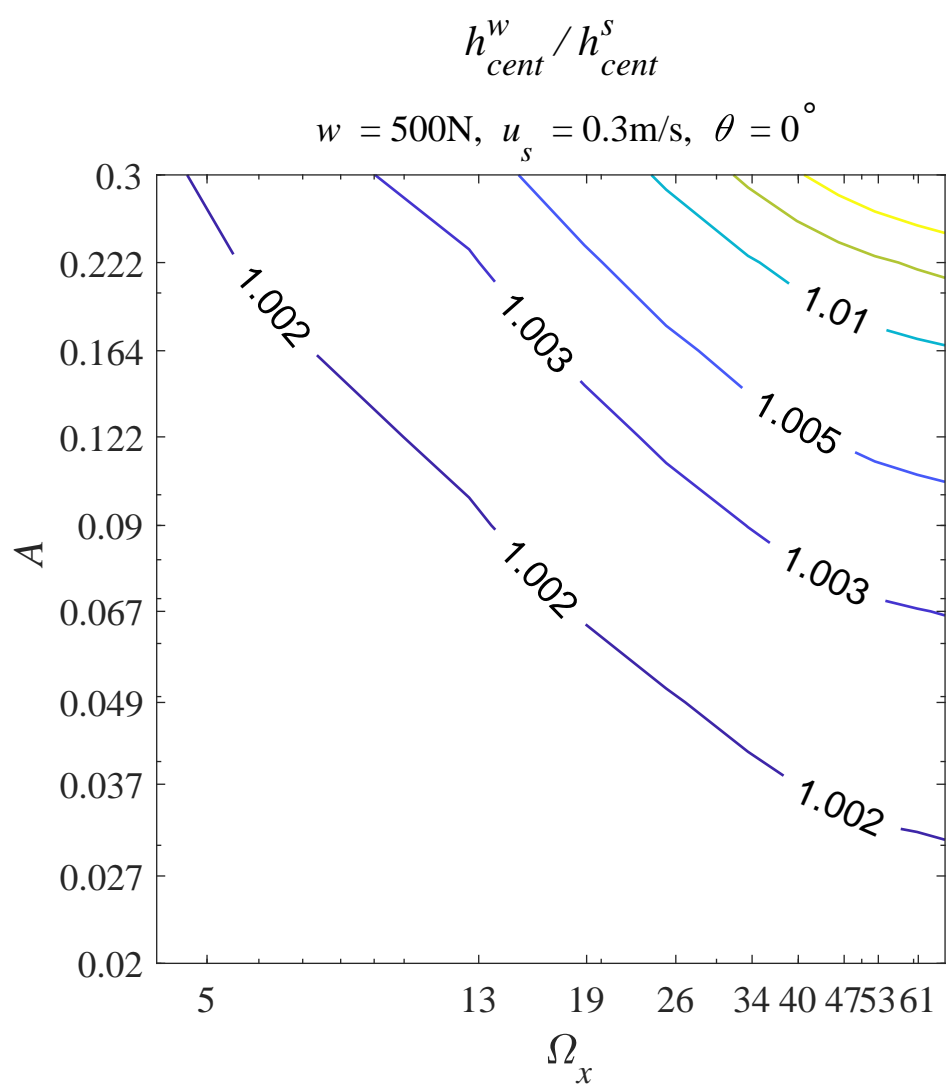

Supplement: s1 [file s1]

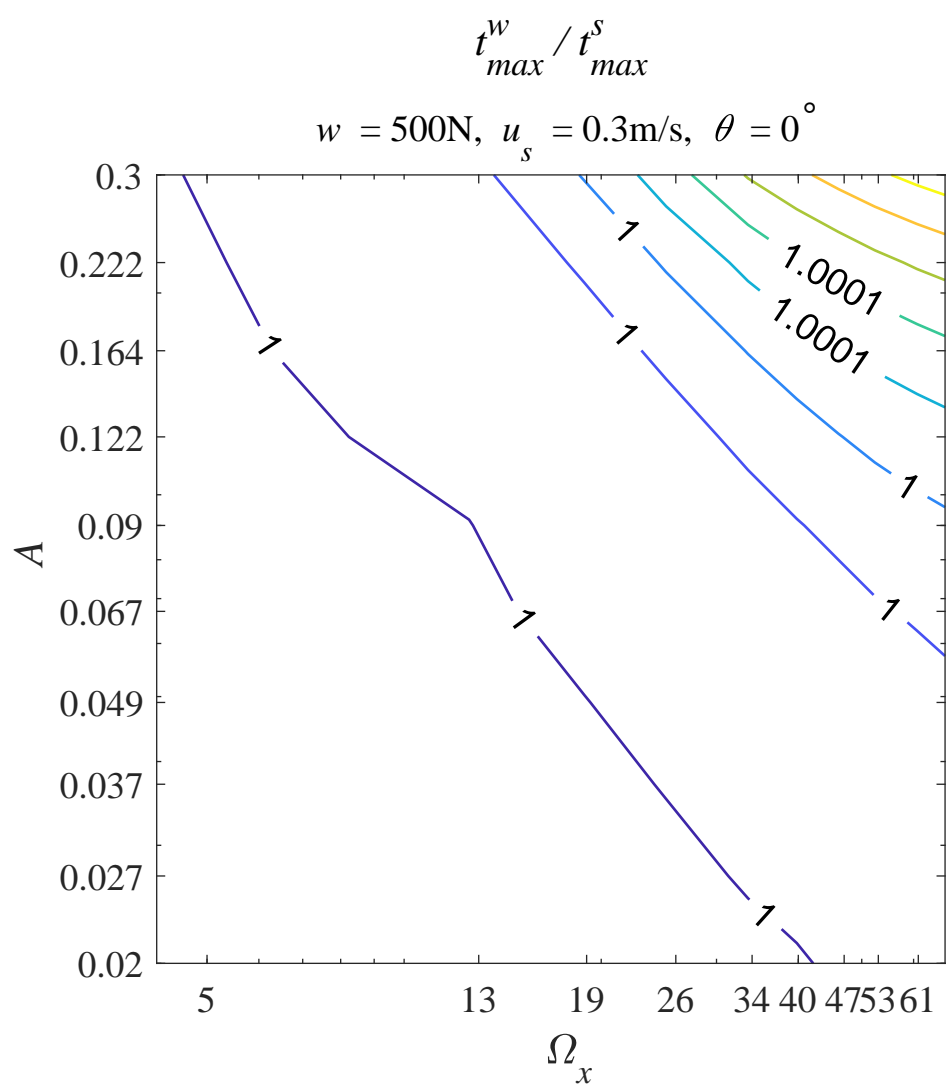

Supplement: s1 [file s1]

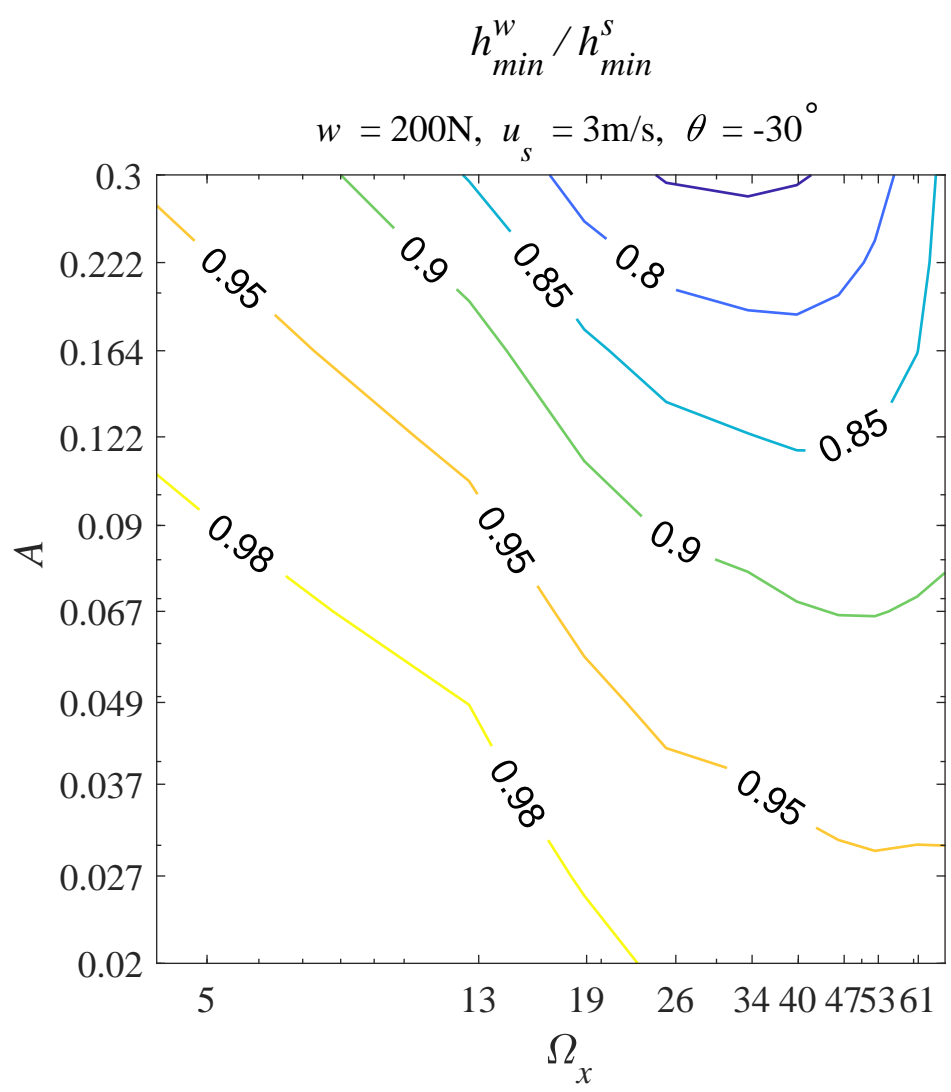

Supplement: s1 [file s1]

$$P_{max}^w / P_{max}^s$$

$$w = 500\text{N}, u_s = 0.3\text{m/s}, \theta = -60^\circ$$

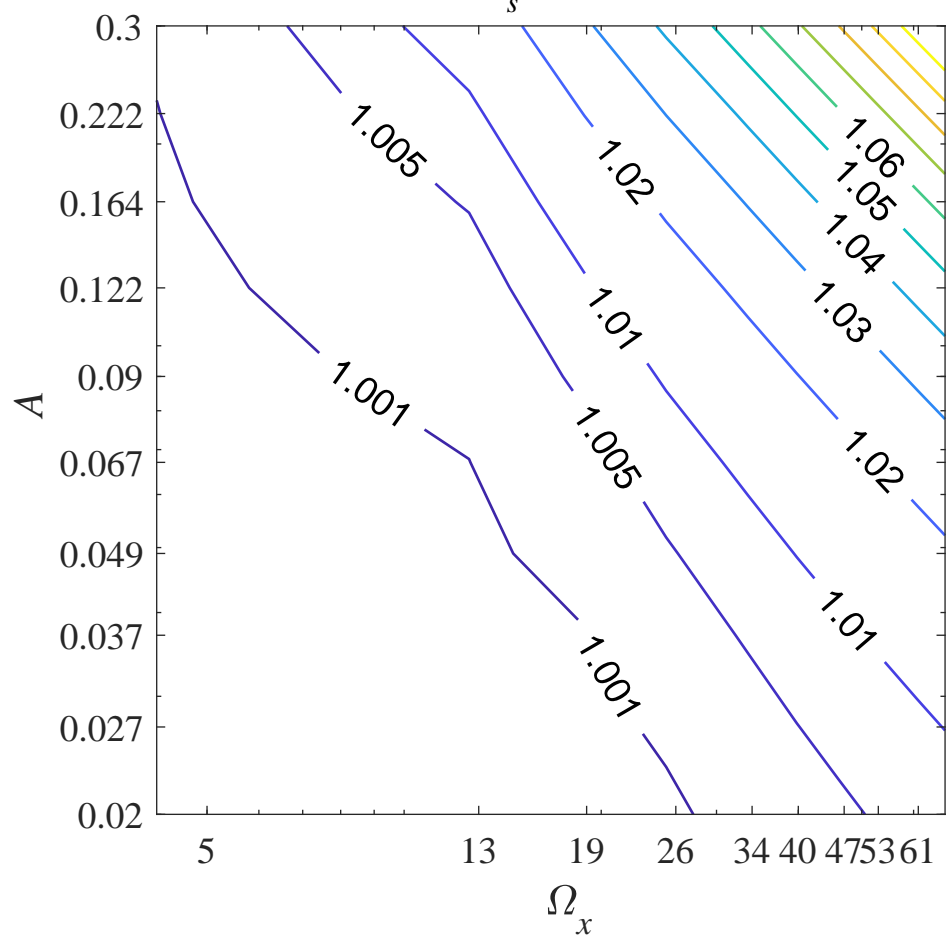

Supplement: s1 [file s1]

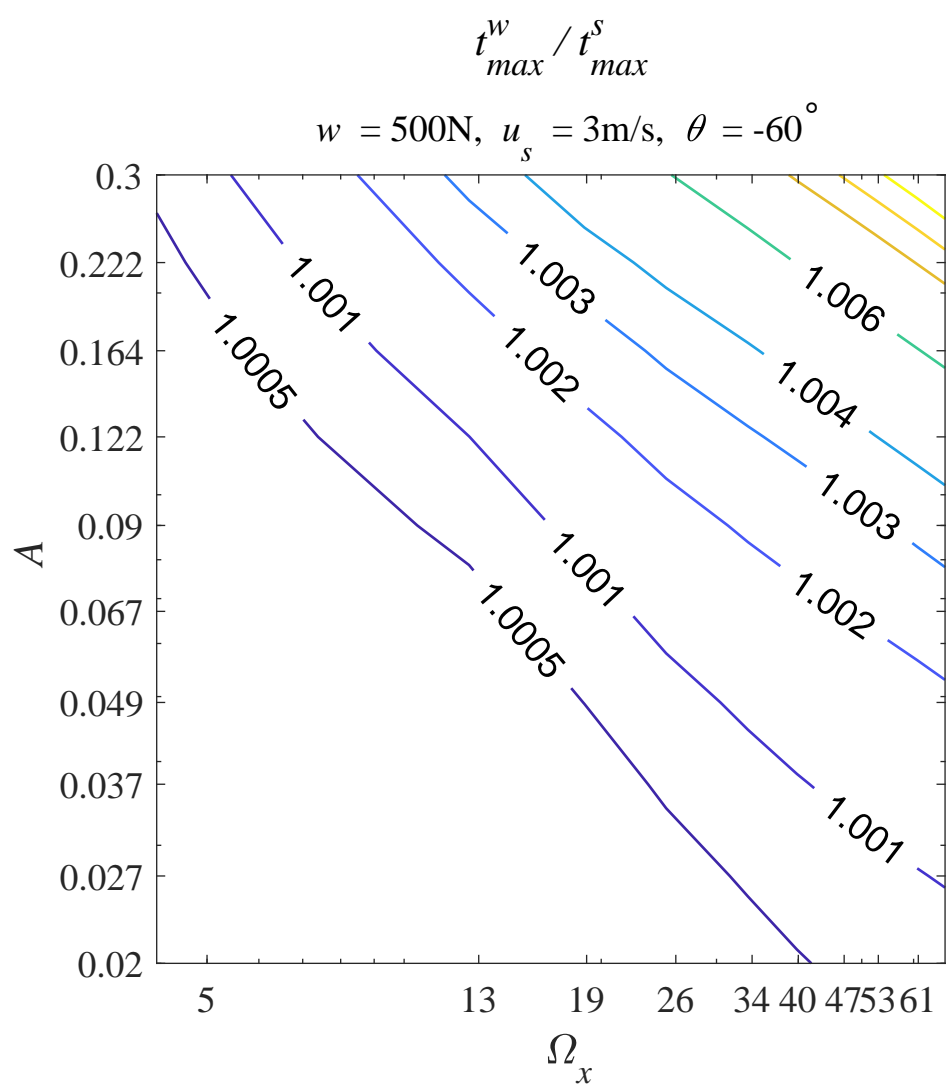

Supplement: s1 [file s1]

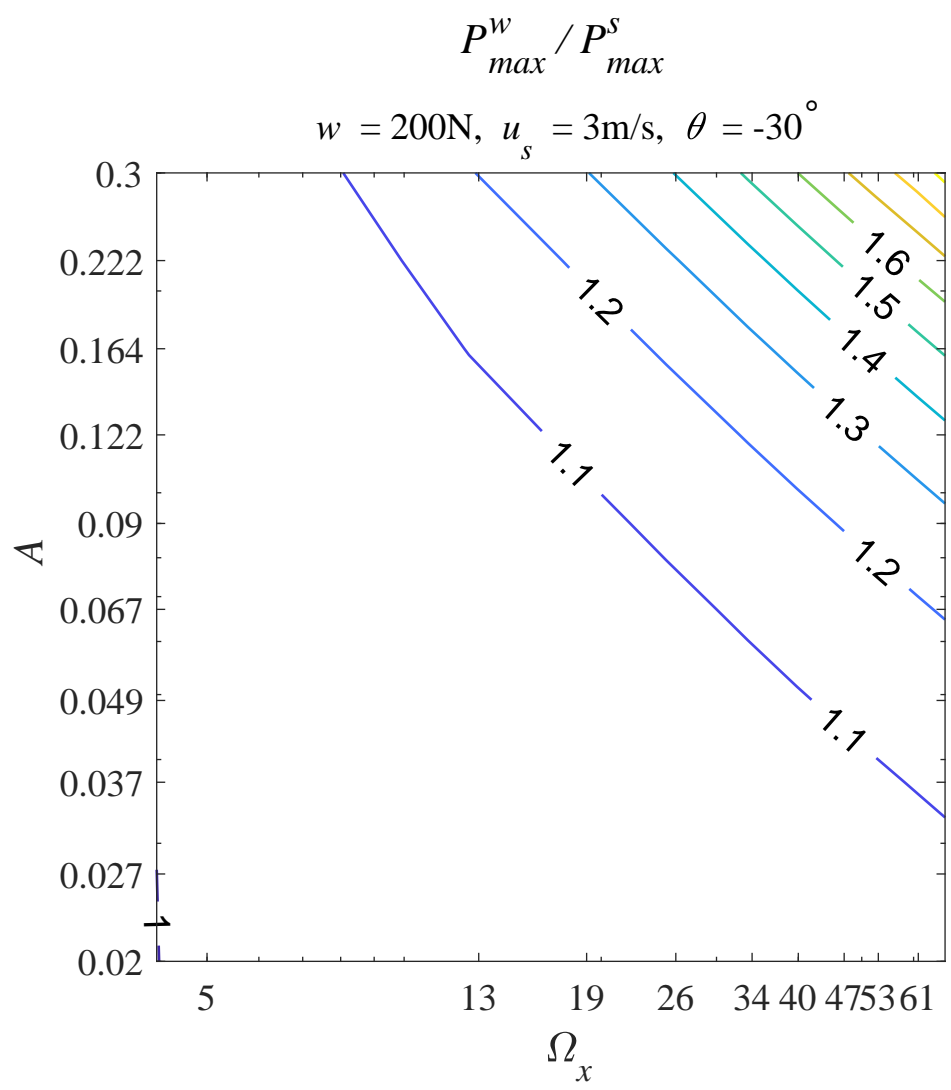

Supplement: s1 [file s1]

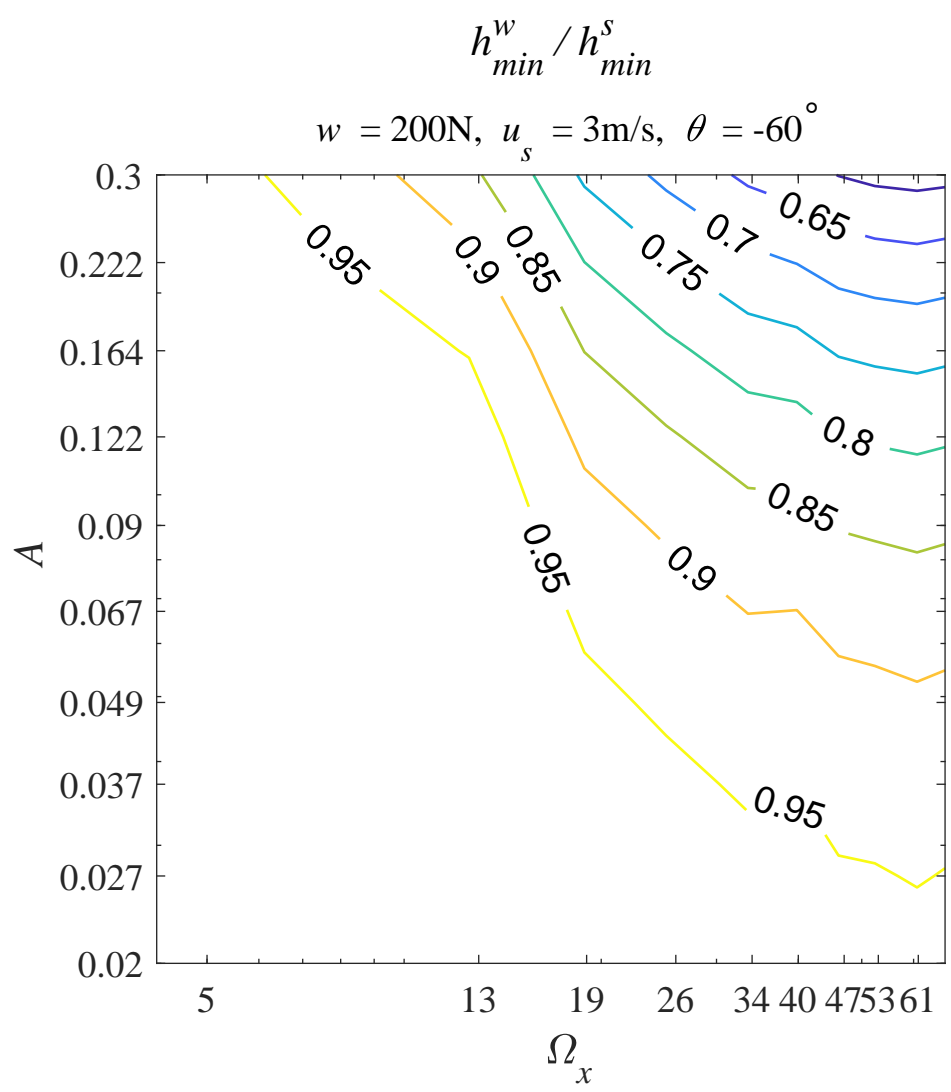

Supplement: s1 [file s1]

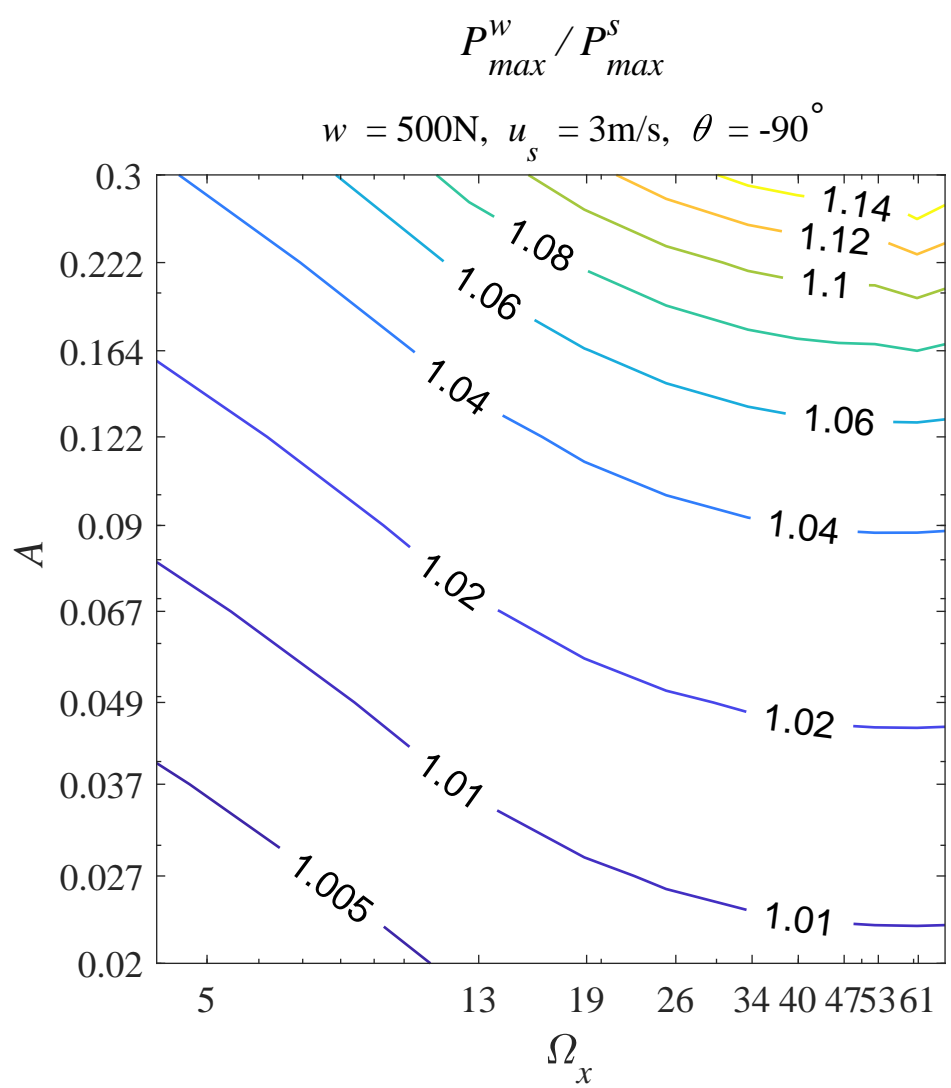

Supplement: s1 [file s1]

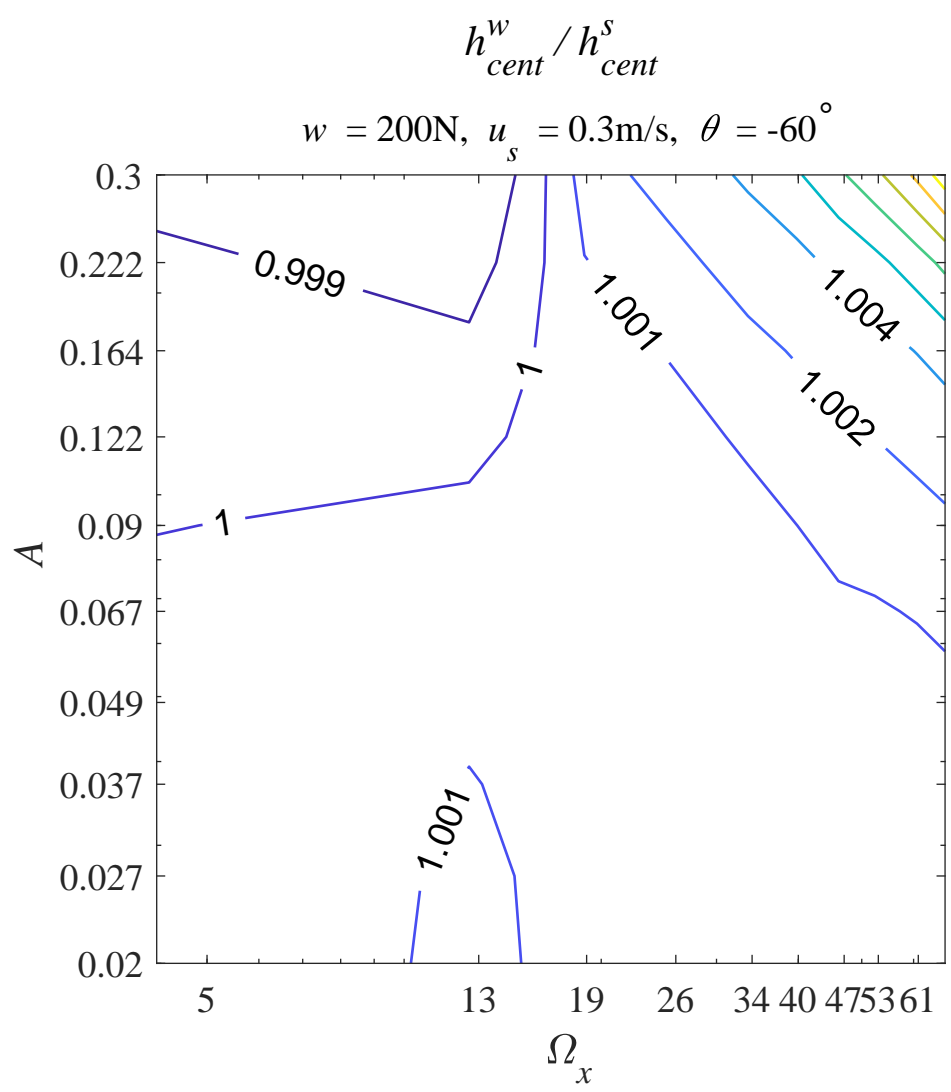

Supplement: s1 [file s1]

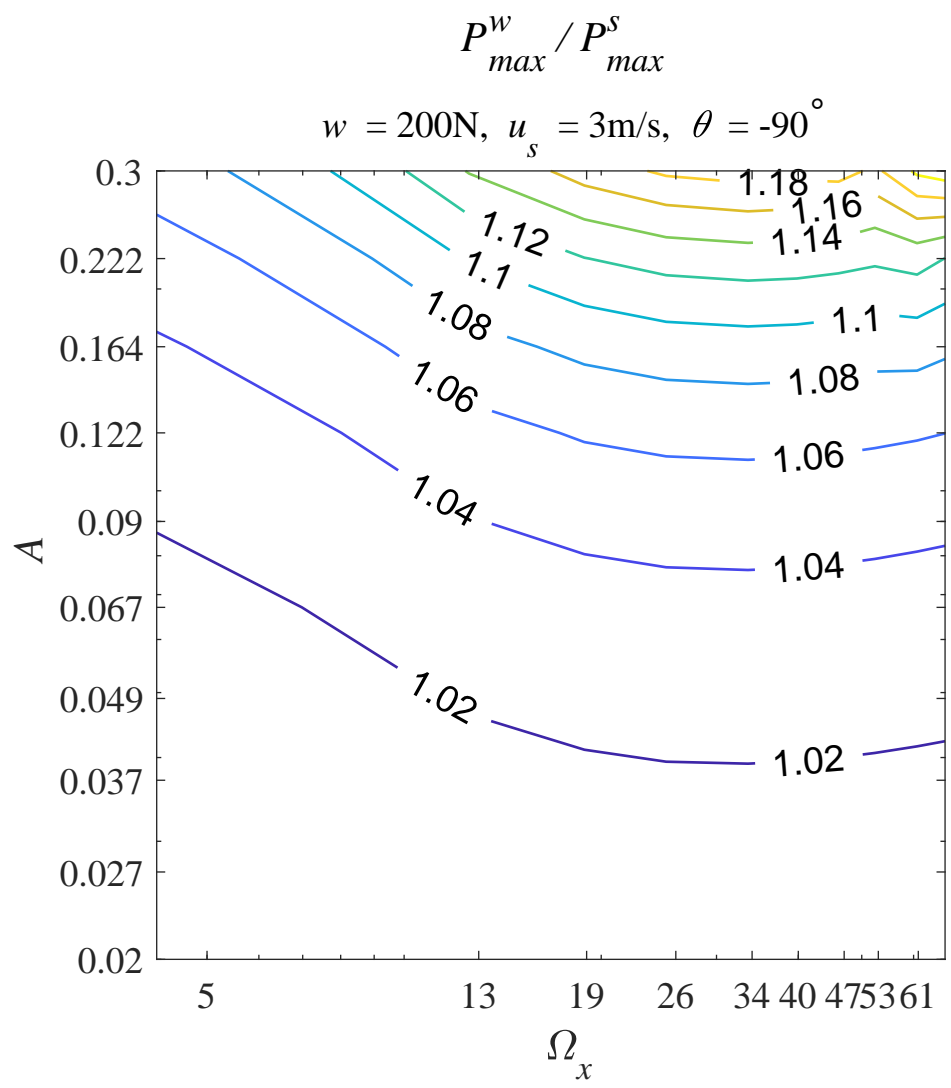

Supplement: s1 [file s1]

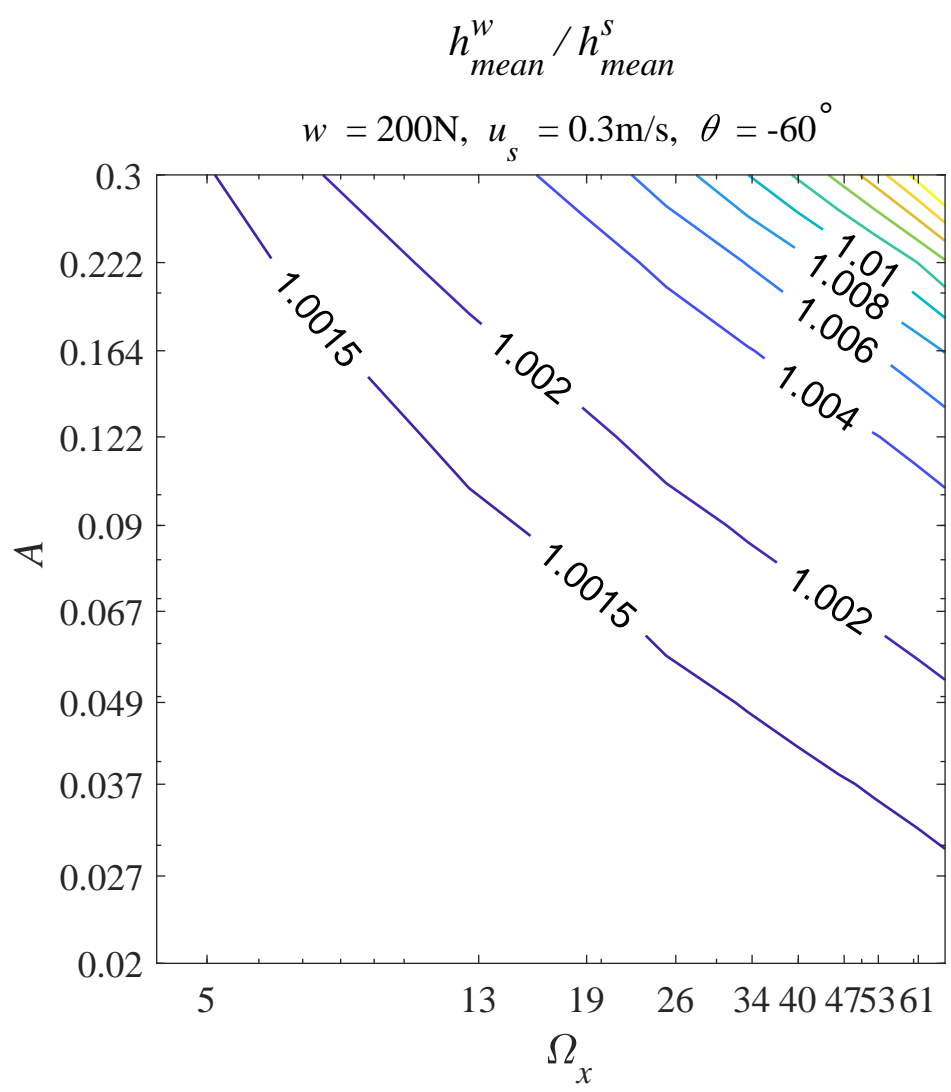

Supplement: s1 [file s1]

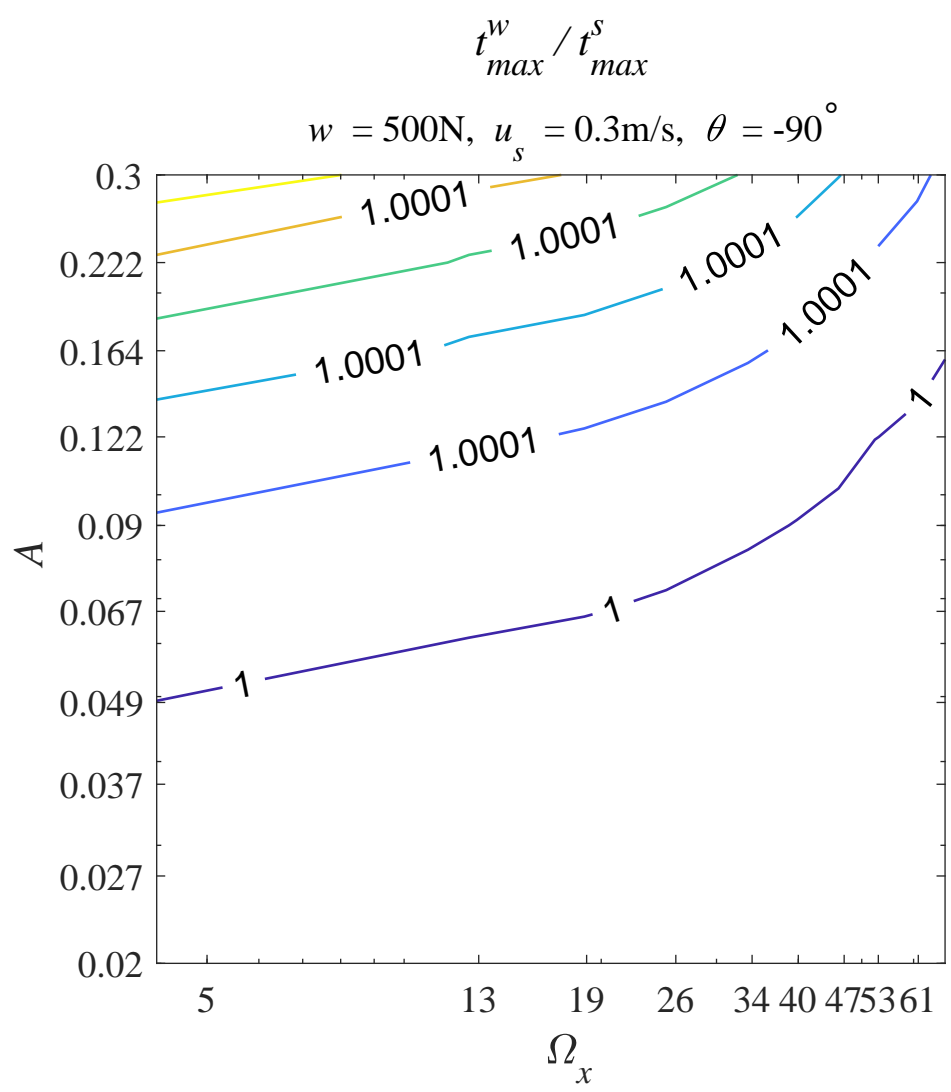

Supplement: s1 [file s1]

$$COF^w / COF^s$$

$$w = 200\text{N}, u_s = 0.3\text{m/s}, \theta = -90^\circ$$

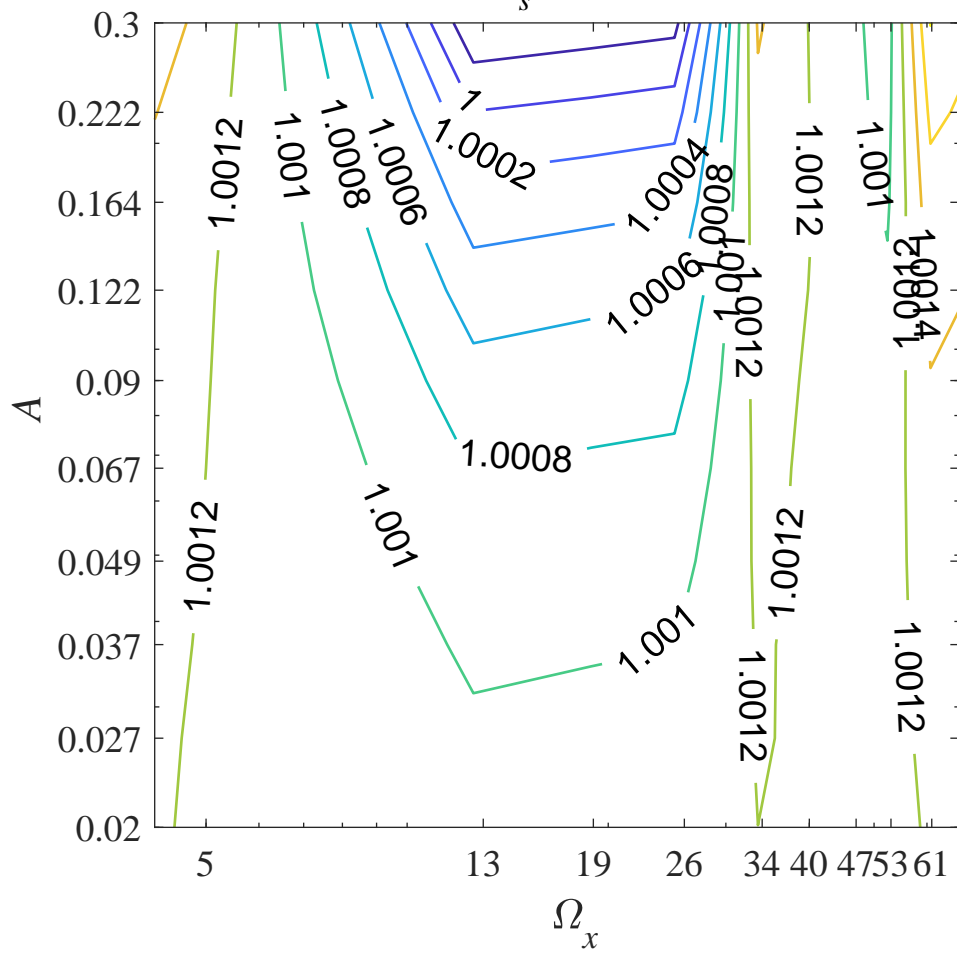

Supplement: s1 [file s1]

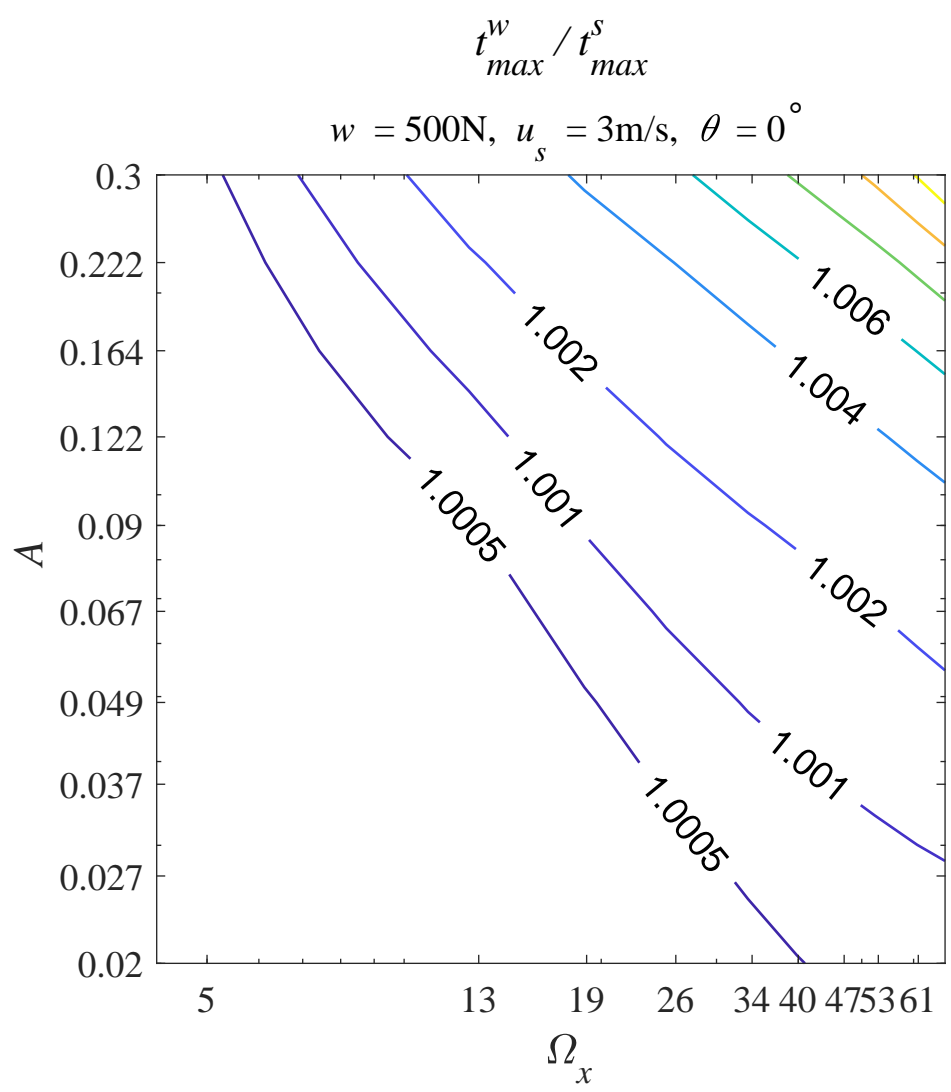

Supplement: s1 [file s1]

$$P_{max}^w / P_{max}^s$$

$$w = 200\text{N}, u_s = 0.3\text{m/s}, \theta = 0^\circ$$

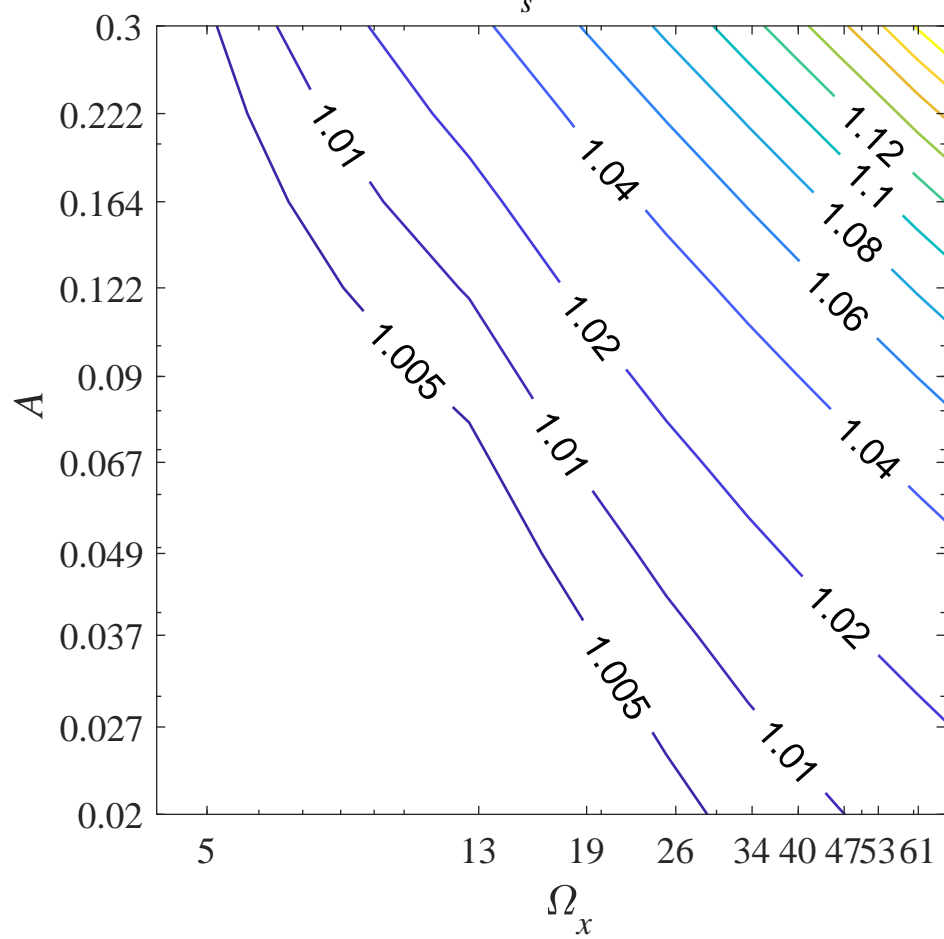

Supplement: s1 [file s1]
